# Supplementary material for: Why electrostatically enhanced thiourea is better than Schreiner's thiourea in both catalytic activity and regioselectivity?
Source: Royal Society of Chemistry journal article supplement (doi:10.1039/c9qo00251k), 2019-01-01
Supplement: c9qo00251k1.pdf [file c9qo00251k1.pdf]

## Supporting Information

### **Why Electrostatically Enhanced Thiourea Is Better Than Schreiner's Thiourea in Both Catalytic Activity and Regioselectivity?**

*Chao-Xian Yan,<sup>a</sup> Rui-Zhi Wu,<sup>a</sup> Ka Lu,<sup>a</sup> Fang-Ling Yang,<sup>a</sup> Xiao-Shan Yang,<sup>a</sup> Rui Wang,<sup>a</sup> Xing Yang,<sup>a</sup> Pan-Pan Zhou,<sup>\*a</sup> Xiangfeng Shao<sup>\*a</sup>*

*<sup>a</sup>State Key Laboratory of Applied Organic Chemistry, Key Laboratory of Nonferrous Metal Chemistry and Resources Utilization of Gansu Province, College of Chemistry and Chemical Engineering, Lanzhou University, 222 South Tianshui Road, Lanzhou 730000, P. R. China.*

*Fax: +86-931-8912582; Tel: +86 931 8912862; \*E-mail: [zhoupp@lzu.edu.cn](mailto:zhoupp@lzu.edu.cn);*

*[shaoxf@lzu.edu.cn](mailto:shaoxf@lzu.edu.cn)*

## Table of Contents

|                                                                                     |            |
|-------------------------------------------------------------------------------------|------------|
| <b>1. Free energy correction.....</b>                                               | <b>S3</b>  |
| <b>2. Identification of the conformations of active catalysts.....</b>              | <b>S4</b>  |
| <b>3. QTAIM analyses of the complexes COM-I~VIII .....</b>                          | <b>S6</b>  |
| <b>4. Optimized structures of eleven unfavorable transition states TS1s .....</b>   | <b>S9</b>  |
| <b>5. Evaluation of basis set .....</b>                                             | <b>S10</b> |
| <b>6. QTAIM analyses of the intermediates, transition states and products. ....</b> | <b>S12</b> |
| <b>7. Cartesian coordinates.....</b>                                                | <b>S24</b> |

## 1. Free energy correction

According to the Supporting Information of Kass' results (Org. Lett. 2016, 18, 188-191), the aminolysis reaction is carried out as follows: "In a 3 dram vial, 0.093 g (1.0 mmol) of aniline, 0.12 g (1.0 mmol) of styrene oxide and 0.1 or 1.0 mol% of the desired catalyst were added under argon at 60 °C". Thereby, the concentrations of two substrates and catalysts:  $\rho(\text{aniline}) = 1.022 \text{ g/mL}$  and  $\rho(\text{styrene oxide}) = 1.054 \text{ g/mL}$ , therefore  $V(\text{aniline}) = 0.091 \text{ mL}$  and  $V(\text{styrene oxide}) = 0.114 \text{ mL}$ , the total volume  $V(\text{total})$  is approximately 0.205 mL,  $c(\text{aniline}) = c(\text{styrene oxide}) = 4.9 \text{ M}$ ,  $c(\text{Cat-I}) = c(\text{Cat-II}) = 4.9 \text{ M} \times 1\% = 0.049 \text{ M}$ ,  $c(\text{BAr}^{\text{F}_4}) = 2c(\text{Cat-II}) = 0.098 \text{ M}$ .

In terms of the ideal gas law  $pV = nRT$ , when  $p = 101.325 \text{ kPa}$ ,  $n = 1 \text{ mol}$ ,  $R = 8.3145 \text{ J/(mol}\cdot\text{K)}$  =  $1.986 \times 10^{-3} \text{ kcal/(mol}\cdot\text{K)}$ ,  $T = 333 \text{ K}$ , the molar volume of gas is  $V_m = (nRT/p) = 0.027 \text{ m}^3/\text{mol} = 27.3 \text{ L/mol}$ . That is, in 1 atm gas-phase condition, the molar concentration  $c = (1/27.3) \text{ mol/L}$ .

At 333.0K, the correction from 1 atm to 4.9 M concentration is

$$RT \ln(4.9 \times 27.3) = 1.986 \times 10^{-3} \text{ kcal/(mol}\cdot\text{K)} \times 333 \text{ K} \times \ln(4.9 \times 27.3) = 3.2 \text{ kcal/mol}$$

while at 333.0K, the correction from 1 atm to 0.098 M concentration is

$$RT \ln(0.098 \times 27.3) = 1.986 \times 10^{-3} \text{ kcal/(mol}\cdot\text{K)} \times 333 \text{ K} \times \ln(0.098 \times 27.3) = 0.7 \text{ kcal/mol}$$

Therefore, the following free energy corrections were applied:

(1) For the **Cat-I**(*syn-anti*) + **R1** → **COM-I** procedure, it is a 2 to 1 component procedure.

The calculated free energy change without correction is 6.6 kcal/mol, while the free energy change after correction is  $6.6 + (1-2) \times 3.2 = 3.4 \text{ kcal/mol}$ .

(2) For the **Cat-I**(*syn-anti*) + **R1** + **R2** → **TS1(IA)** procedure, it is a 3 to 1 component procedure. The calculated free energy change without correction is 39.9 kcal/mol, while the free energy change after correction is  $39.9 + (1-3) \times 3.2 = 33.5 \text{ kcal/mol}$ .

(3) For the **Cat-II**(*anti-anti*)-1 + 2**BAr**<sup>F<sub>4</sub></sup> → **Cat-II**(*anti-anti*)-1•(**BAr**<sup>F<sub>4</sub></sup>)<sub>2</sub> procedure, it is a 3 to 1 component procedure. The calculated free energy change without correction is 16.8 kcal/mol, while the free energy change after correction is  $16.8 + (1-3) \times 0.7 = 15.4 \text{ kcal/mol}$ .

In this work, a correction of 3.2 kcal/mol was applied to per component change, that is, the Gibbs free energy change of a reaction from n to m components should be added the correction of  $(m-n) \times 3.2 \text{ kcal/mol}$ .

## 2. Identification of the conformations of active catalysts

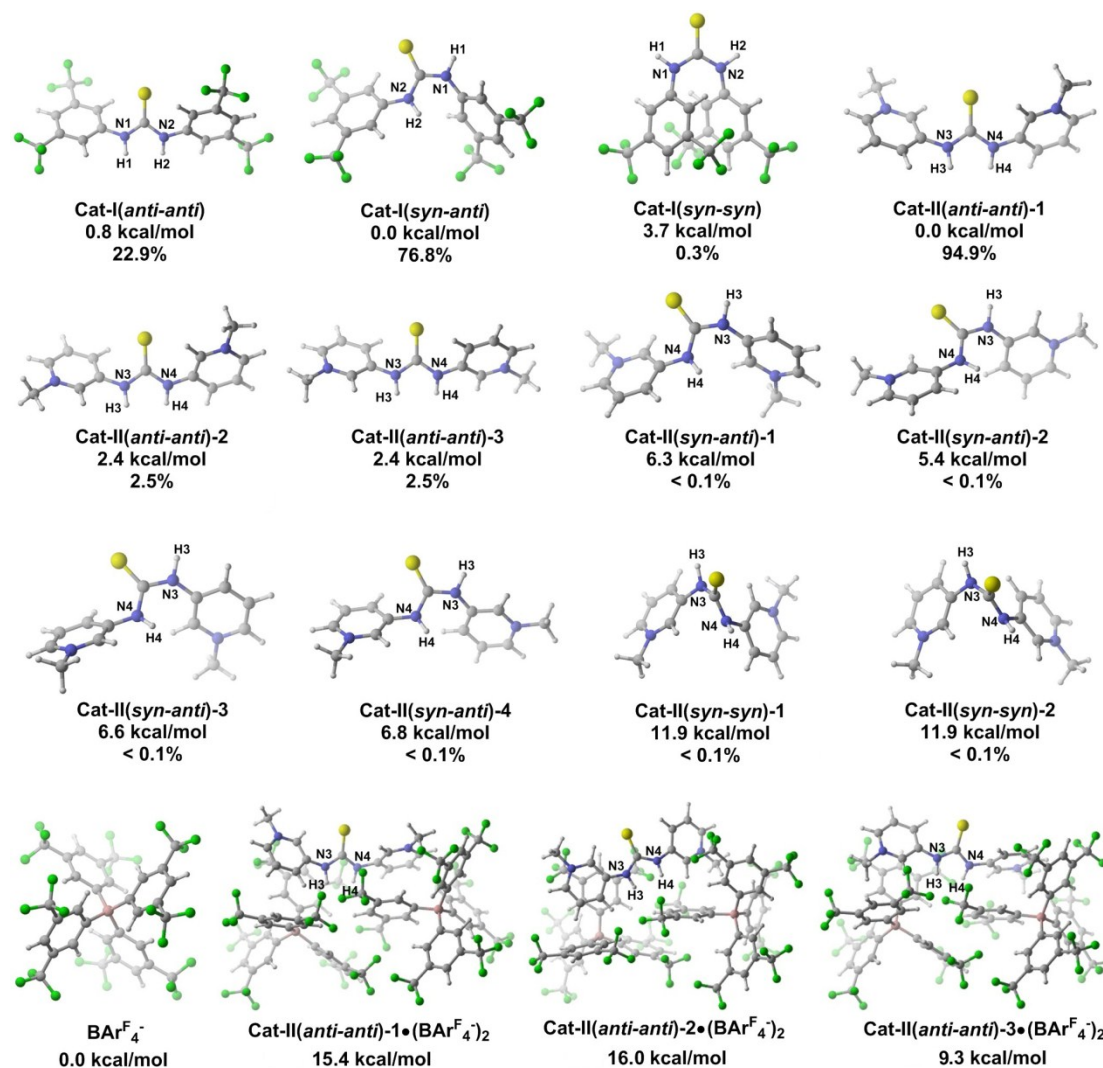

**Fig. S1.** Optimized structures, relative Gibbs free energies and Boltzmann distribution (%) of all possible catalysts. The Boltzmann distributions of **Cat-II**•( $\text{BAr}^{\text{F}_4^-}$ )<sub>2</sub> are not displayed because we do not consider their existence in polar solvent.

For **Cat-I**, three possible conformations (i.e., *anti-anti*, *syn-anti*, *syn-syn*) were taken into account. For **Cat-II**, besides all possible conformations, we also consider the combination of two tetrakis(3,5-bis(trifluoromethyl)phenyl) borate (i.e.,  $\text{BAr}^{\text{F}_4^-}$ ) anions. The corresponding optimized structures and relative Gibbs free energies are displayed in Fig. 1. For **Cat-I**, the *syn-anti* conformation is of majority in Boltzmann distribution, while for **Cat-II**, the *anti-anti* conformation is overwhelming majority. In practice, the isolated **Cat-II** rather than **Cat-II**•( $\text{BAr}^{\text{F}_4^-}$ )<sub>2</sub> catalyzes the reaction, the reasons are as follows: (1) The formation of **Cat-II**•( $\text{BAr}^{\text{F}_4^-}$ )<sub>2</sub> is energetically unfavorable in solvent; (2) The N-H moieties of **Cat-II** are totally blocked when the combination of **Cat-II** with  $\text{BAr}^{\text{F}_4^-}$  anion,

HB donor cannot reach the reactants unless removing  $\text{BAr}^{\text{F}_4^-}$  anions. (3) In large polar solvent the solvent-separated ion pairs are preferred while in non-polar solvent the tight ion pairs are majority, herein all reactants and products are polar molecules, therefore the formation of tight ion pairs is unlikely (M. Samet, J. Buhle, Y. Zhou and S. R. Kass, *J. Am. Chem. Soc.*, 2015, 137, 4678-4680.). (4) In previous research by Kass and co-workers (M. Samet, J. Buhle, Y. Zhou and S. R. Kass, *J. Am. Chem. Soc.*, 2015, 137, 4678-4680.) using  $\text{I}^-$  anion to replace  $\text{BAr}^{\text{F}_4^-}$  anion lowers the interaction between O-H group of phenol and counterion, indicating that  $\text{BAr}^{\text{F}_4^-}$  can hardly combine with HB donor catalyst. Based on the discussions above, we consider three conformations of **Cat-I** and three *anti-anti* conformations of **Cat-II** as active catalysts involved in the whole reactions.

### 3. QTAIM analyses of the complexes COM-I~VIII

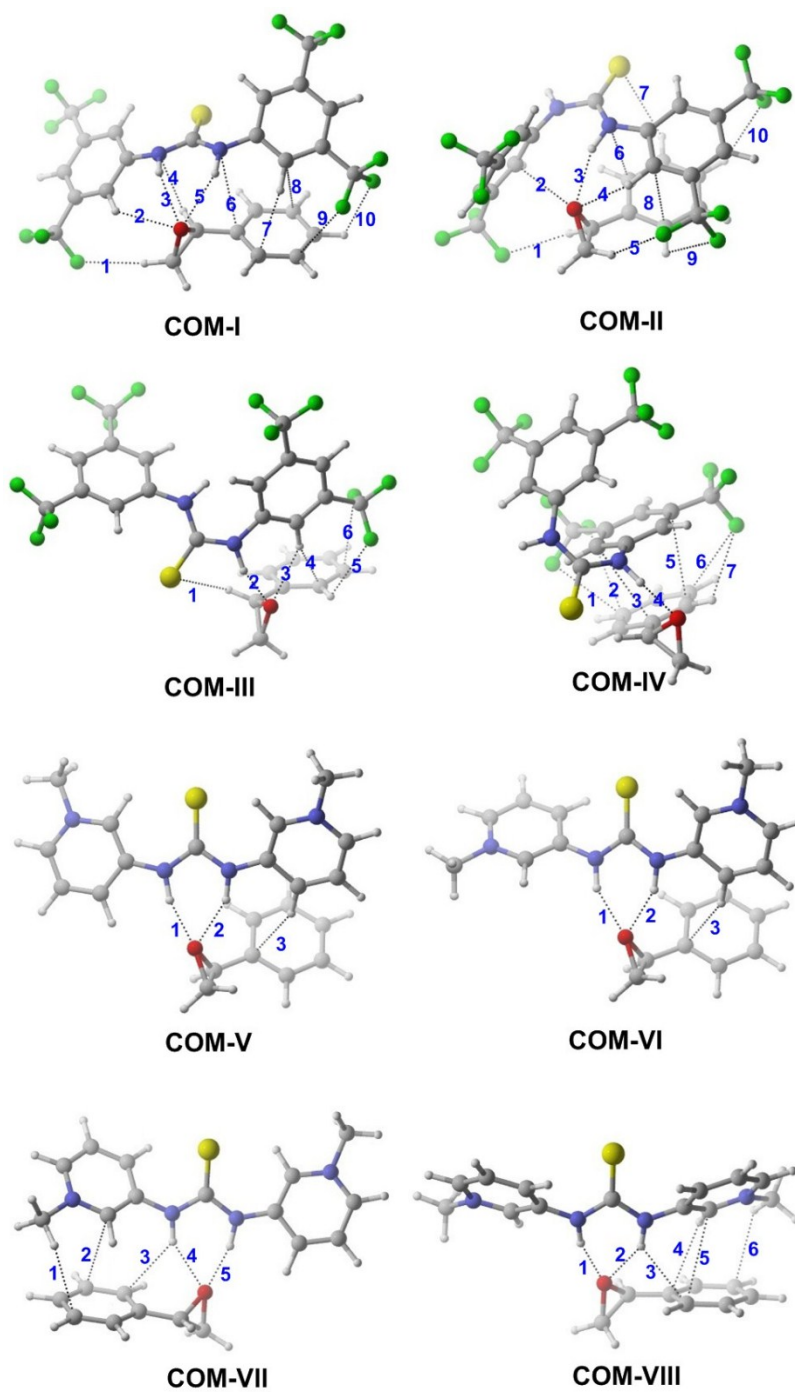

**Fig. S2** Intermolecular interactions in COM-I~VIII and numbers of bond critical points (BCPs No.).

**Table S1** Numbers of bond critical points (BCPs No.) and the corresponding distances between atoms ( $d$ , in Å), classifications of the intermolecular interactions, electron density ( $\rho$ , in a.u.) and its Laplacian value ( $\nabla^2\rho$ , in a.u.), the electronic kinetic energy density ( $G$ , in a.u.), the electronic potential energy density ( $V$ , in a.u.) and the electronic energy density ( $H$ , in a.u.) at the BCPs of **COM-I~VIII**.

|                | BCPs No. | Classification  | $d$  | $\rho$ | $\nabla^2\rho$ | $G$    | $V$     | $H$     |
|----------------|----------|-----------------|------|--------|----------------|--------|---------|---------|
| <b>COM-I</b>   | 1        | C-H...F         | 2.58 | 0.0056 | 0.0249         | 0.0050 | -0.0038 | 0.0012  |
|                | 2        | C-H...O         | 2.47 | 0.0109 | 0.0382         | 0.0088 | -0.0080 | 0.0008  |
|                | 3        | N-H...O         | 2.18 | 0.0178 | 0.0627         | 0.0152 | -0.0148 | 0.0004  |
|                | 4        | C-H...N         | 2.65 | 0.0097 | 0.0363         | 0.0077 | -0.0064 | 0.0013  |
|                | 5        | N-H...O         | 2.38 | 0.0098 | 0.0388         | 0.0089 | -0.0080 | 0.0009  |
|                | 6        | lp... $\pi$     | 3.34 | 0.0066 | 0.0203         | 0.0044 | -0.0038 | 0.0006  |
|                | 7        | C-H... $\pi$    | 2.65 | 0.0091 | 0.0281         | 0.0060 | -0.0050 | 0.0010  |
|                | 8        | $\pi$ ... $\pi$ | 3.38 | 0.0064 | 0.0200         | 0.0041 | -0.0032 | 0.0009  |
|                | 9        | lp... $\pi$     | 3.07 | 0.0068 | 0.0287         | 0.0059 | -0.0046 | 0.0013  |
|                | 10       | C-H...F         | 2.59 | 0.0072 | 0.0340         | 0.0068 | -0.0050 | 0.0018  |
| <b>COM-II</b>  | 1        | C-H...F         | 2.45 | 0.0085 | 0.0361         | 0.0078 | -0.0066 | 0.0012  |
|                | 2        | lp... $\pi$     | 3.02 | 0.0101 | 0.0357         | 0.0080 | -0.0071 | 0.0009  |
|                | 3        | N-H...O         | 2.14 | 0.0168 | 0.0518         | 0.0134 | -0.0139 | -0.0005 |
|                | 4        | C-H...O         | 2.40 | 0.0124 | 0.0399         | 0.0096 | -0.0092 | 0.0004  |
|                | 5        | C-H...F         | 2.60 | 0.0054 | 0.0248         | 0.0050 | -0.0037 | 0.0013  |
|                | 6        | lp... $\pi$     | 3.11 | 0.0095 | 0.0278         | 0.0063 | -0.0057 | 0.0006  |
|                | 7        | C-H...S         | 3.24 | 0.0052 | 0.0152         | 0.0029 | -0.0021 | 0.0008  |
|                | 8        | $\pi$ ... $\pi$ | 3.16 | 0.0091 | 0.0265         | 0.0056 | -0.0046 | 0.0010  |
|                | 9        | C-H...F         | 2.65 | 0.0063 | 0.0307         | 0.0060 | -0.0043 | 0.0017  |
|                | 10       | C-H...F         | 2.95 | 0.0024 | 0.0133         | 0.0024 | -0.0014 | 0.0010  |
| <b>COM-III</b> | 1        | C-H...S         | 2.93 | 0.0080 | 0.0232         | 0.0048 | -0.0037 | 0.0011  |
|                | 2        | N-H...O         | 1.90 | 0.0279 | 0.0913         | 0.0231 | -0.0234 | -0.0003 |
|                | 3        | C-H...O         | 2.39 | 0.0108 | 0.0388         | 0.0090 | -0.0082 | 0.0007  |
|                | 4        | C-H... $\pi$    | 2.61 | 0.0085 | 0.0269         | 0.0057 | -0.0046 | 0.0011  |
|                | 5        | C-H...F         | 2.76 | 0.0051 | 0.0249         | 0.0048 | -0.0034 | 0.0014  |
|                | 6        | lp... $\pi$     | 3.25 | 0.0043 | 0.0194         | 0.0038 | -0.0027 | 0.0011  |
| <b>COM-IV</b>  | 1        | lp... $\pi$     | 3.11 | 0.0066 | 0.0279         | 0.0057 | -0.0044 | 0.0013  |
|                | 2        | lp... $\pi$     | 3.29 | 0.0046 | 0.0198         | 0.0039 | -0.0028 | 0.0011  |
|                | 3        | $\pi$ ... $\pi$ | 3.30 | 0.0075 | 0.0214         | 0.0045 | -0.0036 | 0.0009  |
|                | 4        | N-H...O         | 2.06 | 0.0211 | 0.0700         | 0.0178 | -0.0181 | -0.0003 |
|                | 5        | $\pi$ ... $\pi$ | 3.32 | 0.0068 | 0.0008         | 0.0041 | -0.0033 | 0.0008  |
|                | 6        | lp... $\pi$     | 3.19 | 0.0054 | 0.0268         | 0.0052 | -0.0037 | 0.0015  |
|                | 7        | C-H...F         | 2.69 | 0.0058 | 0.0286         | 0.0056 | -0.0040 | 0.0016  |
| <b>COM-V</b>   | 1        | N-H...O         | 1.86 | 0.0283 | 0.0990         | 0.0242 | -0.0236 | 0.0006  |
|                | 2        | N-H...O         | 2.02 | 0.0232 | 0.0647         | 0.0176 | -0.0190 | -0.0014 |
|                | 3        | C-H... $\pi$    | 2.59 | 0.0104 | 0.0325         | 0.0071 | -0.0061 | 0.0010  |

|                 |   |                 |      |        |        |        |         |         |
|-----------------|---|-----------------|------|--------|--------|--------|---------|---------|
| <b>COM-VI</b>   | 1 | N-H...O         | 1.93 | 0.0245 | 0.0832 | 0.0207 | -0.0207 | 0.0000  |
|                 | 2 | N-H...O         | 1.94 | 0.0271 | 0.0781 | 0.0208 | -0.0221 | -0.0013 |
|                 | 3 | C-H... $\pi$    | 2.59 | 0.0104 | 0.0323 | 0.0071 | -0.0061 | 0.0010  |
| <b>COM-VII</b>  | 1 | C-H... $\pi$    | 2.79 | 0.0069 | 0.0213 | 0.0042 | -0.0031 | 0.0011  |
|                 | 2 | $\pi$ ... $\pi$ | 3.31 | 0.0072 | 0.0222 | 0.0045 | -0.0034 | 0.0011  |
|                 | 3 | N-H... $\pi$    | 2.62 | 0.0080 | 0.0271 | 0.0057 | -0.0046 | 0.0011  |
|                 | 4 | N-H...O         | 2.12 | 0.0176 | 0.0541 | 0.0141 | -0.0147 | -0.0006 |
|                 | 5 | N-H...O         | 1.87 | 0.0280 | 0.0961 | 0.0235 | -0.0231 | 0.0004  |
| <b>COM-VIII</b> | 1 | N-H...O         | 1.90 | 0.0261 | 0.0883 | 0.0218 | -0.0215 | 0.0003  |
|                 | 2 | N-H...O         | 2.09 | 0.0189 | 0.0573 | 0.0151 | -0.0158 | -0.0007 |
|                 | 3 | N-H... $\pi$    | 2.61 | 0.0082 | 0.0284 | 0.0059 | -0.0048 | 0.0011  |
|                 | 4 | C-H... $\pi$    | 2.76 | 0.0077 | 0.0244 | 0.0051 | -0.0040 | 0.0011  |
|                 | 5 | $\pi$ ... $\pi$ | 3.33 | 0.0073 | 0.0223 | 0.0045 | -0.0035 | 0.0010  |
|                 | 6 | C-H... $\pi$    | 2.81 | 0.0066 | 0.0207 | 0.0041 | -0.0030 | 0.0011  |

---



#### 4. Optimized structures of eleven unfavorable transition states TS1s

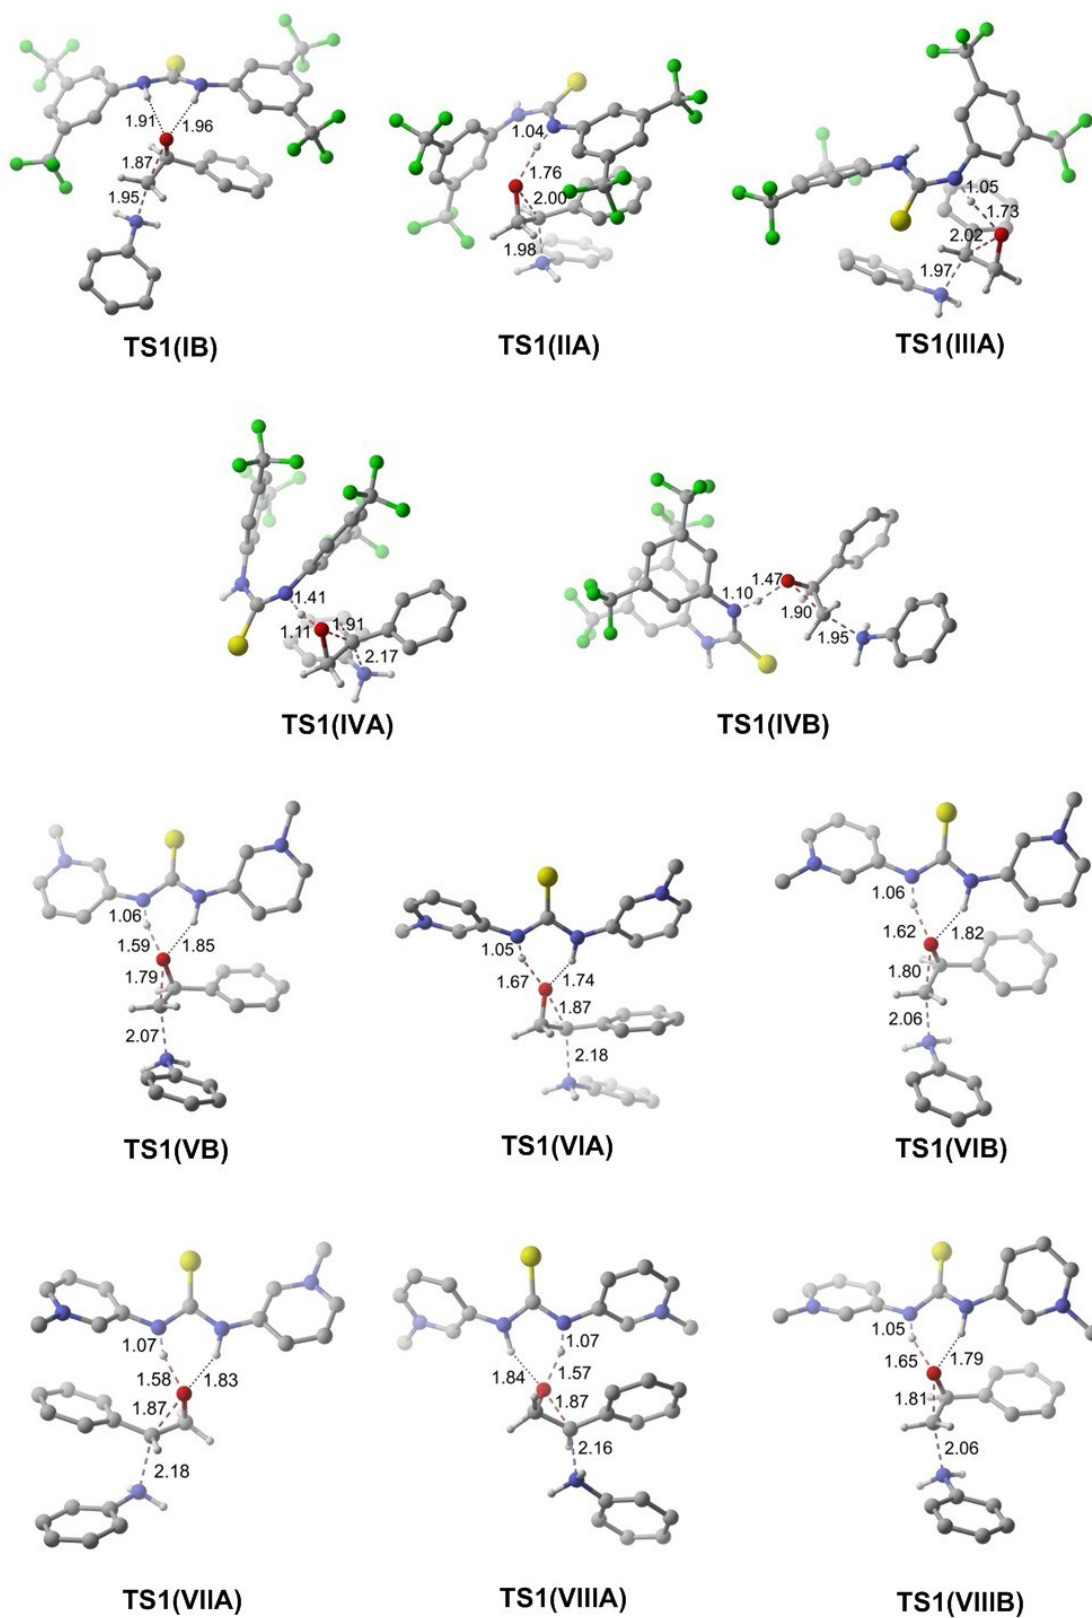

**Fig. S3.** Optimized structures of eleven unfavorable transition states **TS1s**. Distances are in Å. Some hydrogen atoms and intermolecular interactions are omitted for clarity.

## 5. Evaluation of basis set

Because there are strong electrostatic interactions in **Cat-II**, we also calculated single-point energies at the M06-2X-D3/6-311++G(2df,2pd)/IEFPCM(aniline) level of theory for **TS1** structures. The solution-phase Gibbs free energy using diffuse function is denoted as  $G(\text{diffuse})$ , which is the sum of gas-phase thermal correction to Gibbs free energy at M06-2X/6-31G(d,p) (333.0 K) level and solution-phase single-point energy at M06-2X-D3/6-311++G(2df,2pd)/IEFPCM(aniline) level. The calculated results are displayed in **Table S2**. It can be seen that the theoretical regioselectivity significantly deviates from the experimental result after considering the diffuse function.

**Table S2** Relative activation Gibbs free energies ( $G_{\text{act}}(\text{diffuse})$ , in kcal•mol<sup>-1</sup>), relative reaction rates ( $k_{\text{rel}}$ ) and their summary ( $k_{\text{rel}}(\text{sum})$ ), the calculated and real regioselectivities (dr) of **TS1s** when using  $G(\text{diffuse})$ . The Gibbs free energies of **R1**, **R2**, **Cat-I** (*syn-anti*) and **Cat-II** (*anti-anti*)-1 are set to 0.0 kcal/mol as reference.

| Pathways   | TSs        | $G_{\text{act}}(\text{diffuse})$ | $k_{\text{rel}}^a$ | $k_{\text{rel}}(\text{sum})$ | $\text{dr}(\mathbf{A}:\mathbf{B})_{\text{Theor}}^b$ | $\text{dr}(\mathbf{A}:\mathbf{B})_{\text{Exp}}$ |
|------------|------------|----------------------------------|--------------------|------------------------------|-----------------------------------------------------|-------------------------------------------------|
| path IA    | TS1(IA)    | 31.0                             | 1.0000             | 1.0315                       | 5.97:1                                              | 1.86:1                                          |
| path IIA   | TS1(IIA)   | 33.5                             | 0.0241             |                              |                                                     |                                                 |
| path IIIA  | TS1(IIIA)  | 35.1                             | 0.0021             |                              |                                                     |                                                 |
| path IVA   | TS1(IVA)   | 34.5                             | 0.0053             |                              |                                                     |                                                 |
| path IB    | TS1(IB)    | 35.7                             | 0.0008             | 0.1727                       |                                                     |                                                 |
| path IIB   | TS1(IIB)   | 32.2                             | 0.1670             |                              |                                                     |                                                 |
| path IIIB  | TS1(IIIB)  | 34.6                             | 0.0040             |                              |                                                     |                                                 |
| path IVB   | TS1(IVB)   | 35.6                             | 0.0009             |                              |                                                     |                                                 |
| path VA    | TS1(VA)    | 25.1                             | 1.0000             | 1.1383                       | 379:1                                               | 9:1                                             |
| path VIA   | TS1(VIA)   | 27.6                             | 0.0239             |                              |                                                     |                                                 |
| path VIIA  | TS1(VIIA)  | 26.8                             | 0.0795             |                              |                                                     |                                                 |
| path VIIIA | TS1(VIIIA) | 27.3                             | 0.0349             |                              |                                                     |                                                 |
| path VB    | TS1(VB)    | 30.1                             | 0.0006             | 0.0030                       |                                                     |                                                 |
| path VIB   | TS1(VIB)   | 30.6                             | 0.0003             |                              |                                                     |                                                 |
| path VIIB  | TS1(VIIB)  | 29.2                             | 0.0021             |                              |                                                     |                                                 |
| path VIIB  | TS1(VIIB)  | 31.8                             | 0.0000             |                              |                                                     |                                                 |

<sup>a</sup> For paths **IA-IVB**,  $k_{\text{rel}}$  of **TS1(IA)** is set to 1.0000 as reference, and  $k_{\text{rel}}$  of other TSs (denoted as **TS1(X)**)

is calculated as:  $k_{\text{rel}}(\mathbf{TS1(X)}) : k_{\text{rel}}(\mathbf{TS1(IA)}) = \exp\left(\frac{-G_{\text{act}}(\mathbf{TS1(X)})}{RT}\right) : \exp\left(\frac{-G_{\text{act}}(\mathbf{TS1(IA)})}{RT}\right) = \exp\left(-\frac{G_{\text{act}}(\mathbf{TS1(X)}) - G_{\text{act}}(\mathbf{TS1(IA)})}{RT}\right)$ ;

For paths **VA-VIIIB**,  $k_{\text{rel}}$  of **TS1(VA)** is set to 1.0000 as reference, and  $k_{\text{rel}}$  of other TSs (denoted as **TS1(Y)**) is calculated as:  $k_{\text{rel}}(\mathbf{TS1(Y)}) : k_{\text{rel}}(\mathbf{TS1(VA)}) = \exp\left(\frac{-G_{\text{act}}(\mathbf{TS1(Y)})}{RT}\right) :$

$$\exp\left(\frac{-G_{act}(TS1(VA))}{RT}\right) = \exp\left(\frac{G_{act}(TS1(Y)) - G_{act}(TS1(VA))}{RT}\right); \text{ where } R = 1.986 \times 10^{-3} \text{ kcal}\cdot(\text{mol}\cdot\text{K})^{-1} \text{ and } T = 333.0 \text{ K.}$$

<sup>b</sup>The theoretical dr (**A:B**) =  $k_{rel}(\text{sum pathA}) : k_{rel}(\text{sum pathB})$ .

## 6. QTAIM analyses of the intermediates, transition states and products.

QTAIM analyses were carried out on some optimized intermediates, transition states and products to figure out the intermolecular interactions. No intramolecular hydrogen bond is found in product **A** or **B**.

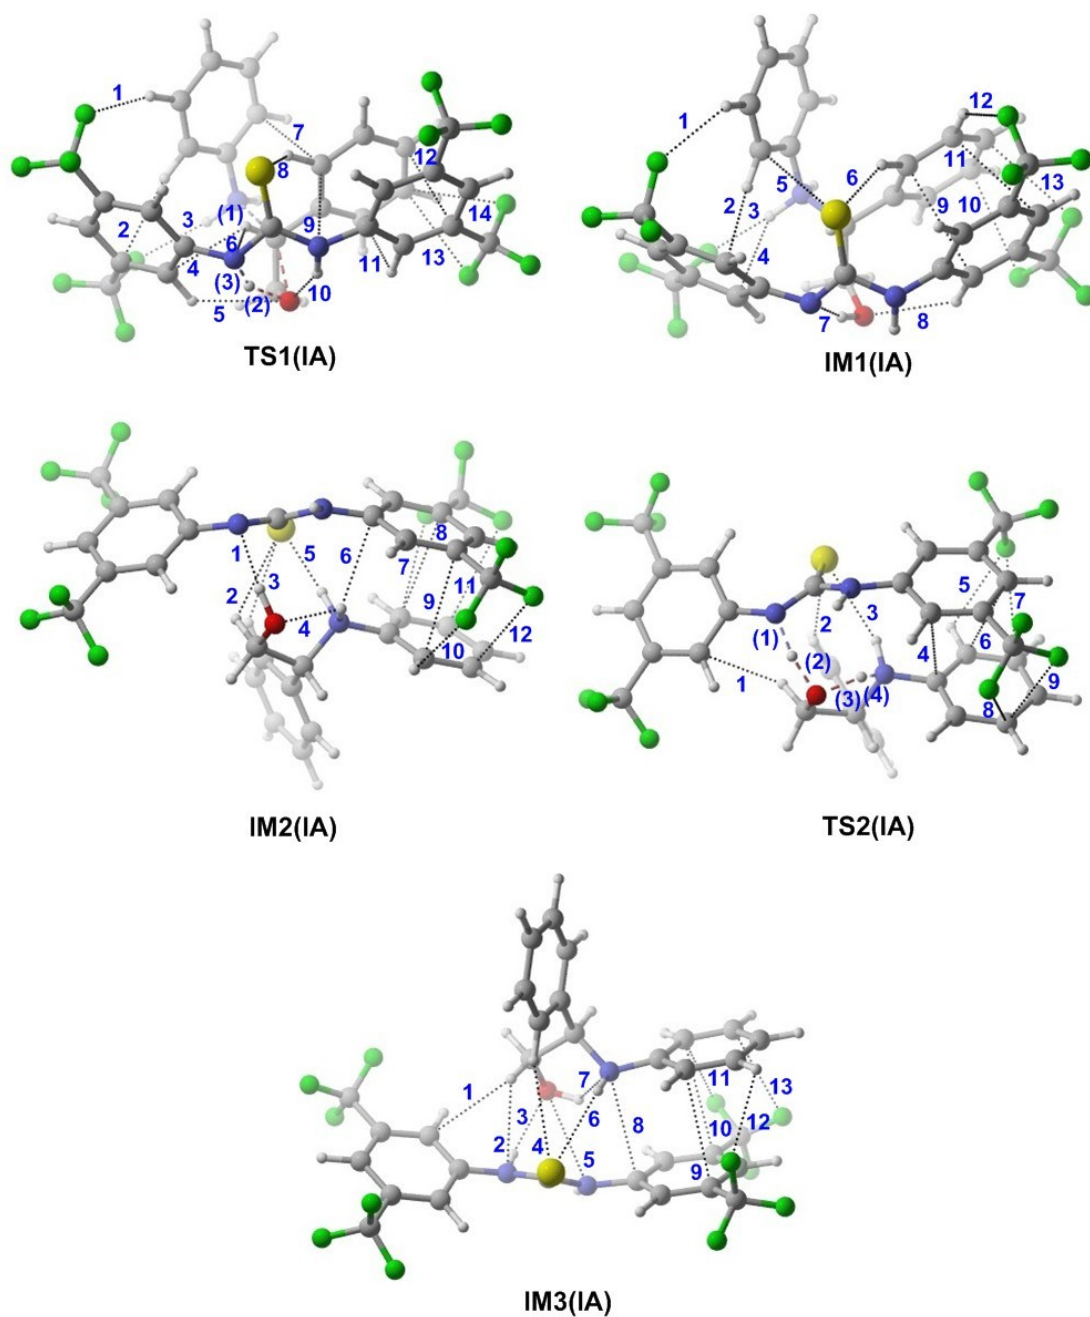

**Fig. S4** Intermolecular interactions in **TS1(IA)**, **IM1(IA)**, **IM2(IA)**, **TS2(IA)** and **IM3(IA)**, and numbers of bond critical points (BCPs No.) The BCPs No. of TSs are in parentheses.

**Table S3** Numbers of Bond Critical Point (BCPs No.) and the corresponding distances between atoms ( $d$ , in Å), classifications of the intermolecular interactions, electron density ( $\rho$ , in a.u.) and its Laplacian value ( $\nabla^2\rho$ , in a.u.), the electronic kinetic energy density ( $G$ , in a.u.), the electronic potential energy density ( $V$ , in a.u.) and the electronic energy density ( $H$ , in a.u.) at the BCPs of **TS1(IA)**, **IM1(IA)**, **IM2(IA)**, **TS2(IA)** and **IM3(IA)**.

|                | BCPs No.    | Classification  | $d$    | $\rho$ | $\nabla^2\rho$ | $G$     | $V$     | $H$     |
|----------------|-------------|-----------------|--------|--------|----------------|---------|---------|---------|
| <b>TS1(IA)</b> | 1           | C-H...F         | 2.41   | 0.3085 | -0.8242        | 0.1008  | -0.4076 | -0.3068 |
|                | 2           | C-H... $\pi$    | 2.64   | 0.0090 | 0.0280         | 0.0060  | -0.0050 | 0.0010  |
|                | 3           | N-H...F         | 2.25   | 0.0104 | 0.0412         | 0.0097  | -0.0092 | 0.0007  |
|                | 4           | C-H... $\pi$    | 2.56   | 0.0102 | 0.0348         | 0.0074  | -0.0061 | 0.0013  |
|                | 5           | C-H...O         | 2.61   | 0.0093 | 0.0336         | 0.0074  | -0.0064 | 0.0010  |
|                | 6           | C-H...N         | 2.53   | 0.0107 | 0.0386         | 0.0085  | -0.0074 | 0.0011  |
|                | 7           | $\pi$ ... $\pi$ | 3.13   | 0.0097 | 0.0288         | 0.0060  | -0.0047 | 0.0013  |
|                | 8           | C-H...S         | 2.99   | 0.0074 | 0.0224         | 0.0045  | -0.0034 | 0.0011  |
|                | 9           | lp... $\pi$     | 3.20   | 0.0081 | 0.0250         | 0.0056  | -0.0049 | 0.0007  |
|                | 10          | N-H...O         | 1.84   | 0.0319 | 0.1073         | 0.0270  | -0.0271 | -0.0001 |
|                | 11          | C-H... $\pi$    | 2.91   | 0.0067 | 0.0215         | 0.0043  | -0.0032 | 0.0011  |
|                | 12          | $\pi$ ... $\pi$ | 3.32   | 0.0071 | 0.0203         | 0.0042  | -0.0033 | 0.0009  |
|                | 13          | lp... $\pi$     | 3.14   | 0.0059 | 0.0258         | 0.0052  | -0.0039 | 0.0013  |
|                | 14          | lp... $\pi$     | 3.06   | 0.0073 | 0.0335         | 0.0068  | -0.0051 | 0.0017  |
|                | (1)         | C...N           | 2.07   | 0.0671 | 0.1035         | 0.0390  | -0.0521 | -0.0131 |
|                | (2)         | O...H           | 1.84   | 0.0358 | 0.1052         | 0.0280  | -0.0296 | -0.0016 |
|                | (3)         | H...N           | 1.03   | 0.3253 | -1.7473        | 0.0473  | -0.5313 | -0.4840 |
| <b>IM1(IA)</b> | 1           | C-H...F         | 2.50   | 0.0065 | 0.0295         | 0.0061  | -0.0049 | 0.0012  |
|                | 2           | C-H... $\pi$    | 2.67   | 0.0087 | 0.0278         | 0.0059  | -0.0049 | 0.0010  |
|                | 3           | N-H...F         | 2.06   | 0.0169 | 0.0561         | 0.0147  | -0.0154 | -0.0007 |
|                | 4           | N-H... $\pi$    | 2.89   | 0.0054 | 0.0185         | 0.0037  | -0.0028 | 0.0009  |
|                | 5           | lp... $\pi$     | 3.75   | 0.0052 | 0.0143         | 0.0028  | -0.0020 | 0.0008  |
|                | 6           | C-H...S         | 2.65   | 0.0130 | 0.0353         | 0.0080  | -0.0073 | 0.0007  |
|                | 7           | O-H...N         | 1.76   | 0.0479 | 0.0989         | 0.0299  | -0.0351 | -0.0052 |
|                | 8           | C-H...O         | 2.58   | 0.0084 | 0.0293         | 0.0065  | -0.0056 | 0.0009  |
|                | 9           | $\pi$ ... $\pi$ | 3.40   | 0.0067 | 0.0183         | 0.0038  | -0.0031 | 0.0007  |
|                | 10          | lp... $\pi$     | 3.16   | 0.0059 | 0.0246         | 0.0050  | -0.0038 | 0.0012  |
|                | 11          | $\pi$ ... $\pi$ | 3.32   | 0.0070 | 0.0197         | 0.0041  | -0.0033 | 0.0008  |
|                | 12          | C-H...F         | 2.63   | 0.0051 | 0.0243         | 0.0048  | -0.0035 | 0.0013  |
| 13             | lp... $\pi$ | 3.07            | 0.0071 | 0.0297 | 0.0061         | -0.0047 | 0.0014  |         |
| <b>IM2(IA)</b> | 1           | O-H...N         | 1.93   | 0.0315 | 0.0798         | 0.0213  | -0.0227 | -0.0014 |
|                | 2           | C-H...S         | 3.03   | 0.0076 | 0.0232         | 0.0048  | -0.0038 | 0.0010  |
|                | 3           | C-H...S         | 2.82   | 0.0096 | 0.0286         | 0.0060  | -0.0049 | 0.0011  |
|                | 4           | N-H...O         | 2.07   | 0.0071 | 0.0251         | 0.0052  | -0.0041 | 0.0011  |
|                | 5           | N-H...S         | 2.12   | 0.0373 | 0.0480         | 0.0178  | -0.0237 | -0.0059 |
|                | 6           | N-H... $\pi$    | 2.58   | 0.0100 | 0.0378         | 0.0078  | -0.0061 | 0.0017  |
|                | 7           | lp... $\pi$     | 3.10   | 0.0065 | 0.0293         | 0.0059  | -0.0045 | 0.0014  |

|                |     |                 |      |        |         |        |         |         |
|----------------|-----|-----------------|------|--------|---------|--------|---------|---------|
| <b>IM2(IA)</b> | 8   | $\pi \dots \pi$ | 3.25 | 0.0077 | 0.0224  | 0.0047 | -0.0037 | 0.0010  |
|                | 9   | $\pi \dots \pi$ | 3.22 | 0.0082 | 0.0239  | 0.0050 | -0.0040 | 0.0010  |
|                | 10  | C-H...F         | 2.54 | 0.0075 | 0.0359  | 0.0072 | -0.0054 | 0.0018  |
|                | 11  | lp... $\pi$     | 3.24 | 0.0047 | 0.0209  | 0.0041 | -0.0029 | 0.0012  |
|                | 12  | lp... $\pi$     | 3.25 | 0.0046 | 0.0208  | 0.0040 | -0.0028 | 0.0012  |
| <b>TS2(IA)</b> | 1   | C-H... $\pi$    | 2.73 | 0.0079 | 0.0278  | 0.0056 | -0.0043 | 0.0013  |
|                | 2   | C-H...S         | 2.85 | 0.0090 | 0.0258  | 0.0054 | -0.0044 | 0.0010  |
|                | 3   | N-H...S         | 2.66 | 0.0124 | 0.0321  | 0.0075 | -0.0069 | 0.0006  |
|                | 4   | $\pi \dots \pi$ | 3.32 | 0.0074 | 0.0207  | 0.0044 | -0.0035 | 0.0009  |
|                | 5   | C-H...F         | 2.69 | 0.0058 | 0.0292  | 0.0057 | -0.0041 | 0.0016  |
|                | 6   | $\pi \dots \pi$ | 3.46 | 0.0066 | 0.0188  | 0.0039 | -0.0031 | 0.0008  |
|                | 7   | lp... $\pi$     | 3.17 | 0.0056 | 0.0278  | 0.0054 | -0.0039 | 0.0015  |
|                | 8   | lp... $\pi$     | 3.09 | 0.0069 | 0.0288  | 0.0059 | -0.0046 | 0.0013  |
|                | 9   | lp... $\pi$     | 3.10 | 0.0068 | 0.0281  | 0.0058 | -0.0045 | 0.0013  |
|                | (1) | N...H           | 1.25 | 0.1727 | -0.4827 | 0.0663 | -0.2532 | -0.1869 |
|                | (2) | H...O           | 1.25 | 0.1557 | -0.2559 | 0.0876 | -0.2391 | -0.1515 |
|                | (3) | O...H           | 1.38 | 0.1148 | 0.0545  | 0.0754 | -0.1371 | -0.0617 |
|                | (4) | H...N           | 1.18 | 0.2160 | -0.8688 | 0.0610 | -0.3391 | -0.2781 |
| <b>IM3(IA)</b> | 1   | C-H... $\pi$    | 2.85 | 0.0064 | 0.0223  | 0.0045 | -0.0034 | 0.0011  |
|                | 2   | C-H...N         | 2.66 | 0.0089 | 0.0335  | 0.0072 | -0.0061 | 0.0010  |
|                | 3   | N-H...O         | 2.05 | 0.0239 | 0.0709  | 0.0189 | -0.0200 | -0.0011 |
|                | 4   | C-H...S         | 3.07 | 0.0058 | 0.0166  | 0.0033 | -0.0024 | 0.0009  |
|                | 5   | lp...lp         | 3.12 | 0.0096 | 0.0364  | 0.0080 | -0.0068 | 0.0012  |
|                | 6   | N-H...S         | 2.71 | 0.0109 | 0.0318  | 0.0070 | -0.0061 | 0.0009  |
|                | 7   | O-H...N         | 2.03 | 0.0290 | 0.0864  | 0.0228 | -0.0239 | -0.0011 |
|                | 8   | lp... $\pi$     | 3.15 | 0.0088 | 0.0273  | 0.0061 | -0.0053 | 0.0008  |
|                | 9   | $\pi \dots \pi$ | 3.34 | 0.0069 | 0.0199  | 0.0041 | -0.0033 | 0.0008  |
|                | 10  | $\pi \dots \pi$ | 3.36 | 0.0071 | 0.0193  | 0.0040 | -0.0033 | 0.0007  |
|                | 11  | lp... $\pi$     | 3.10 | 0.0067 | 0.0285  | 0.0058 | -0.0045 | 0.0013  |
|                | 12  | C-H...F         | 2.65 | 0.0061 | 0.0301  | 0.0059 | -0.0043 | 0.0016  |
|                | 13  | lp... $\pi$     | 3.13 | 0.0061 | 0.0255  | 0.0052 | -0.0040 | 0.0012  |

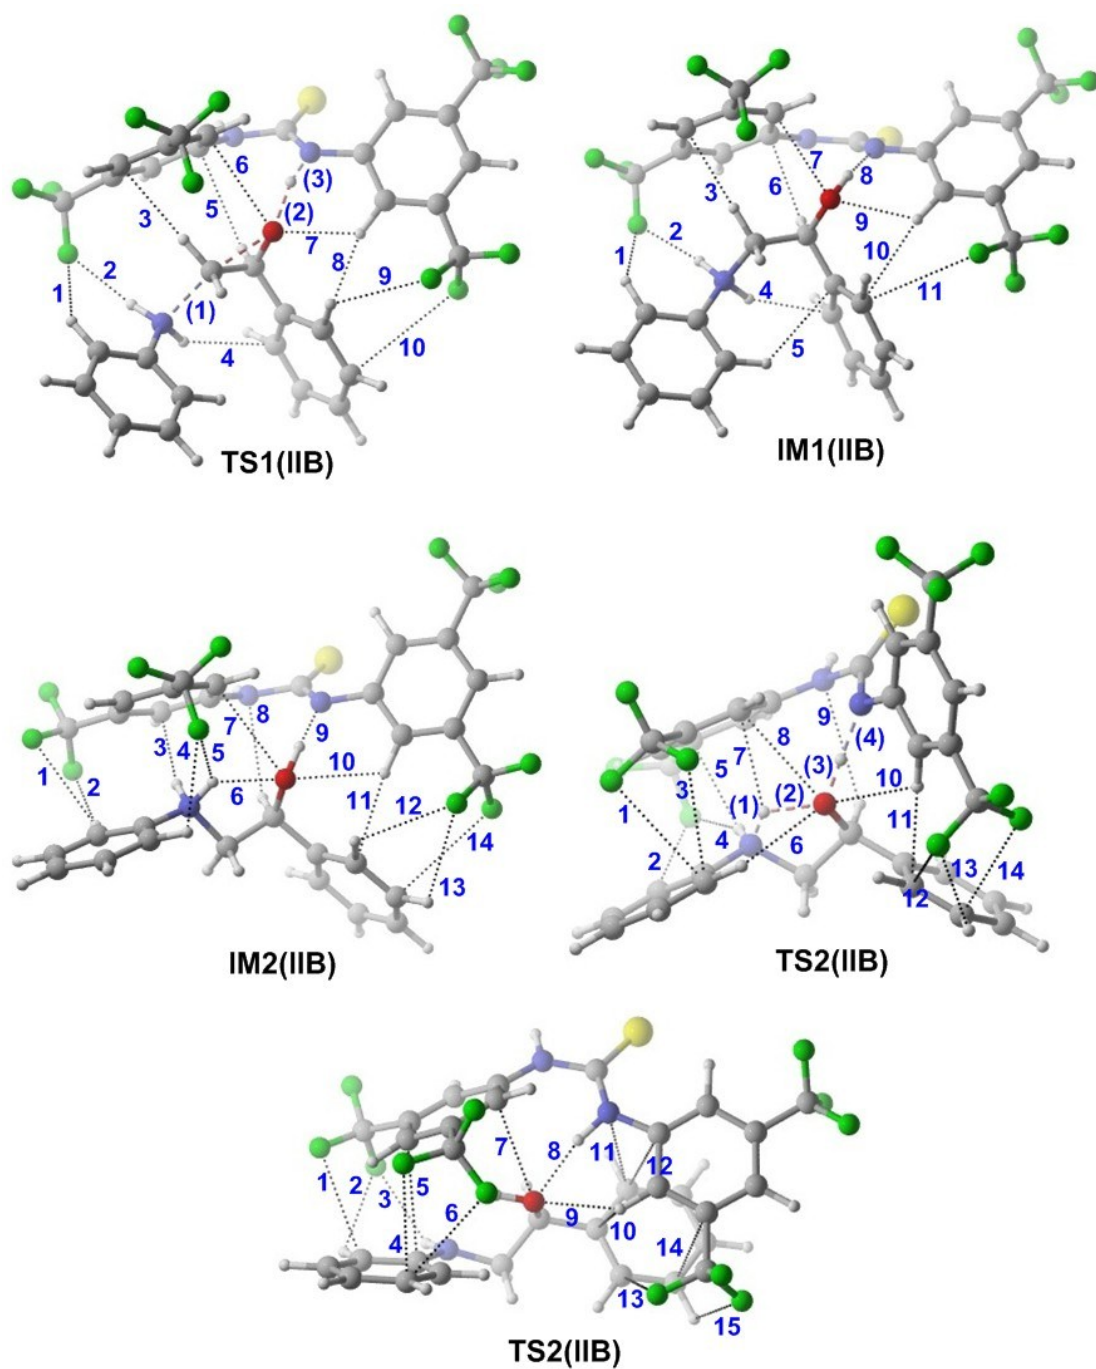

**Fig. S5** Intermolecular interactions in TS1(IIB), IM1(IIB), IM2(IIB), TS2(IIB) and IM3(IIB), and numbers of bond critical points (BCPs No.) The BCPs No. of TSs are in parentheses.

**Table S4** Numbers of Bond Critical Point (BCPs No.) and the corresponding distances between atoms ( $d$ , in Å), classifications of the intermolecular interactions, electron density ( $\rho$ , in a.u.) and its Laplacian value ( $\nabla^2\rho$ , in a.u.), the electronic kinetic energy density ( $G$ , in a.u.), the electronic potential energy density ( $V$ , in a.u.) and the electronic energy density ( $H$ , in a.u.) at the BCPs of **TS1(IIB)**, **IM1(IIB)**, **IM2(IIB)**, **TS2(IIB)** and **IM3(IIB)**.

|                 | BCPs No. | Classification | $d$    | $\rho$ | $\nabla^2\rho$ | $G$     | $V$     | $H$     |
|-----------------|----------|----------------|--------|--------|----------------|---------|---------|---------|
| <b>TS1(IIB)</b> | 1        | C-H...F        | 2.58   | 0.0059 | 0.0265         | 0.0054  | -0.0041 | 0.0013  |
|                 | 2        | N-H...F        | 2.12   | 0.0143 | 0.0523         | 0.0131  | -0.0132 | -0.0001 |
|                 | 3        | C-H... $\pi$   | 2.56   | 0.0104 | 0.0347         | 0.0075  | -0.0063 | 0.0012  |
|                 | 4        | N-H... $\pi$   | 2.61   | 0.0087 | 0.0292         | 0.0061  | -0.0048 | 0.0013  |
|                 | 5        | C-H... $\pi$   | 2.95   | 0.0053 | 0.0196         | 0.0039  | -0.0029 | 0.0010  |
|                 | 6        | lp... $\pi$    | 2.99   | 0.0109 | 0.0352         | 0.0080  | -0.0072 | 0.0008  |
|                 | 7        | C-H...O        | 2.31   | 0.0150 | 0.0480         | 0.0118  | -0.0115 | 0.0003  |
|                 | 8        | C-H... $\pi$   | 2.67   | 0.0077 | 0.0271         | 0.0054  | -0.0041 | 0.0013  |
|                 | 9        | C-H...F        | 2.67   | 0.0053 | 0.0266         | 0.0051  | -0.0036 | 0.0015  |
|                 | 10       | lp... $\pi$    | 3.61   | 0.0020 | 0.0107         | 0.0019  | -0.0012 | 0.0007  |
|                 | (1)      | N...C          | 1.95   | 0.0843 | 0.0968         | 0.0481  | -0.0720 | -0.0239 |
|                 | (2)      | O...H          | 1.56   | 0.0671 | 0.1562         | 0.0500  | -0.0610 | -0.0110 |
|                 | (3)      | H...N          | 1.07   | 0.2846 | -1.4383        | 0.0502  | -0.4599 | -0.4097 |
| <b>IM1(IIB)</b> | 1        | C-H...F        | 2.35   | 0.0099 | 0.0409         | -0.0081 | 0.0092  | 0.0011  |
|                 | 2        | N-H...F        | 2.00   | 0.0192 | 0.0641         | -0.0178 | 0.0169  | -0.0009 |
|                 | 3        | C-H... $\pi$   | 2.55   | 0.0108 | 0.0335         | -0.0063 | 0.0073  | 0.0010  |
|                 | 4        | N-H... $\pi$   | 2.32   | 0.0156 | 0.0479         | -0.0098 | 0.0109  | 0.0011  |
|                 | 5        | C-H... $\pi$   | 2.92   | 0.0059 | 0.0187         | -0.0029 | 0.0038  | 0.0009  |
|                 | 6        | C-H... $\pi$   | 2.54   | 0.0104 | 0.0370         | -0.0063 | 0.0078  | 0.0015  |
|                 | 7        | lp... $\pi$    | 2.95   | 0.0113 | 0.0380         | -0.0076 | 0.0085  | 0.0009  |
|                 | 8        | O-H...N        | 1.60   | 0.0688 | 0.1043         | -0.0587 | 0.0424  | -0.0163 |
|                 | 9        | C-H...O        | 2.42   | 0.0123 | 0.0445         | -0.0089 | 0.0100  | 0.0011  |
|                 | 10       | C-H... $\pi$   | 2.74   | 0.0068 | 0.0217         | -0.0034 | 0.0044  | 0.0010  |
| <b>IM2(IIB)</b> | 11       | lp... $\pi$    | 3.48   | 0.0027 | 0.0140         | -0.0016 | 0.0026  | 0.0010  |
|                 | 1        | lp... $\pi$    | 2.78   | 0.0055 | 0.0262         | 0.0050  | -0.0035 | 0.0015  |
|                 | 2        | lp... $\pi$    | 2.36   | 0.0101 | 0.0398         | 0.0090  | -0.0081 | 0.0009  |
|                 | 3        | C-H... $\pi$   | 2.46   | 0.0126 | 0.0369         | 0.0084  | -0.0077 | 0.0007  |
|                 | 4        | C-H...F        | 2.60   | 0.0073 | 0.0340         | 0.0069  | -0.0052 | 0.0017  |
|                 | 5        | N-H...F        | 2.24   | 0.0119 | 0.0480         | 0.0113  | -0.0106 | 0.0007  |
|                 | 6        | N-H...O        | 1.98   | 0.0296 | 0.1025         | 0.0258  | -0.0260 | -0.0002 |
|                 | 7        | lp... $\pi$    | 3.04   | 0.0098 | 0.0329         | 0.0073  | -0.0064 | 0.0009  |
|                 | 8        | C-H...N        | 2.83   | 0.0065 | 0.0202         | 0.0044  | -0.0038 | 0.0006  |
|                 | 9        | O-H...N        | 1.55   | 0.0775 | 0.0907         | 0.0464  | -0.0701 | -0.0237 |
|                 | 10       | C-H...O        | 2.62   | 0.0085 | 0.0346         | 0.0072  | -0.0057 | 0.0015  |
|                 | 11       | C-H... $\pi$   | 2.45   | 0.0112 | 0.0358         | 0.0078  | -0.0067 | 0.0011  |
|                 | 12       | C-H...F        | 2.81   | 0.0043 | 0.0219         | 0.0041  | -0.0028 | 0.0013  |
| 13              | C-H...F  | 2.83           | 0.0040 | 0.0209 | 0.0039         | -0.0026 | 0.0013  |         |



|                 |                 |                 |        |        |         |         |         |         |
|-----------------|-----------------|-----------------|--------|--------|---------|---------|---------|---------|
| <b>TS2(IIb)</b> | 14              | lp... $\pi$     | 3.37   | 0.0033 | 0.0161  | 0.0030  | -0.0020 | 0.0010  |
|                 | 1               | lp... $\pi$     | 3.22   | 0.0057 | 0.0246  | 0.0050  | -0.0038 | 0.0012  |
|                 | 2               | C-H...F         | 2.45   | 0.0081 | 0.0352  | 0.0075  | -0.0062 | 0.0013  |
|                 | 3               | lp... $\pi$     | 3.11   | 0.0062 | 0.0269  | 0.0054  | -0.0041 | 0.0013  |
|                 | 4               | N-H...F         | 2.30   | 0.0099 | 0.0402  | 0.0093  | -0.0085 | 0.0008  |
|                 | 5               | N-H... $\pi$    | 2.50   | 0.0110 | 0.0377  | 0.0081  | -0.0067 | 0.0014  |
|                 | 6               | C-H...O         | 2.68   | 0.0075 | 0.0284  | 0.0060  | -0.0049 | 0.0011  |
|                 | 7               | H... $\pi$      | 2.51   | 0.0110 | 0.0359  | 0.0078  | -0.0066 | 0.0012  |
|                 | 8               | lp... $\pi$     | 3.03   | 0.0107 | 0.0335  | 0.0076  | -0.0068 | 0.0008  |
|                 | 9               | C-H...N         | 3.10   | 0.0039 | 0.0140  | 0.0029  | -0.0023 | 0.0006  |
|                 | 10              | C-H...O         | 2.62   | 0.0086 | 0.0349  | 0.0073  | -0.0058 | 0.0015  |
|                 | 11              | C-H... $\pi$    | 2.45   | 0.0113 | 0.0352  | 0.0077  | -0.0066 | 0.0011  |
|                 | 12              | lp... $\pi$     | 3.30   | 0.0044 | 0.0219  | 0.0042  | -0.0029 | 0.0013  |
|                 | 13              | C-H...F         | 2.73   | 0.0050 | 0.0254  | 0.0049  | -0.0034 | 0.0015  |
| <b>IM3(IIb)</b> | 14              | lp... $\pi$     | 3.22   | 0.0047 | 0.0210  | 0.0041  | -0.0029 | 0.0012  |
|                 | (1)             | N...H           | 1.07   | 0.2908 | -1.5124 | 0.0448  | -0.4677 | -0.4229 |
|                 | (2)             | H...O           | 1.65   | 0.0590 | 0.1604  | 0.0462  | -0.0523 | -0.0061 |
|                 | (3)             | O...H           | 1.11   | 0.2234 | -0.8305 | 0.0864  | -0.3803 | -0.2939 |
|                 | (4)             | H...N           | 1.40   | 0.1139 | -0.0374 | 0.0620  | -0.1334 | -0.0714 |
|                 | 1               | lp... $\pi$     | 3.02   | 0.0081 | 0.0331  | 0.0070  | -0.0057 | 0.0013  |
|                 | 2               | C-H...F         | 2.50   | 0.0090 | 0.0413  | 0.0085  | -0.0067 | 0.0018  |
|                 | 3               | N-H...F         | 2.35   | 0.0104 | 0.0486  | 0.0105  | -0.0089 | 0.0016  |
|                 | 4               | lp... $\pi$     | 3.24   | 0.0048 | 0.0208  | 0.0041  | -0.0030 | 0.0011  |
|                 | 5               | $\pi$ ... $\pi$ | 3.30   | 0.0071 | 0.0209  | 0.0044  | -0.0035 | 0.0009  |
|                 | 6               | lp... $\pi$     | 3.12   | 0.0063 | 0.0283  | 0.0057  | -0.0043 | 0.0014  |
|                 | 7               | lp... $\pi$     | 2.99   | 0.0115 | 0.0404  | 0.0088  | -0.0075 | 0.0013  |
|                 | 8               | N-H...O         | 1.93   | 0.0281 | 0.0826  | 0.0218  | -0.0229 | -0.0011 |
|                 | 9               | C-H...F         | 2.45   | 0.0103 | 0.0357  | 0.0082  | -0.0075 | 0.0007  |
|                 | 10              | C-H... $\pi$    | 2.90   | 0.0076 | 0.0247  | 0.0049  | -0.0037 | 0.0012  |
| 11              | lp... $\pi$     | 3.19            | 0.0080 | 0.0244 | 0.0055  | -0.0048 | 0.0007  |         |
| 12              | $\pi$ ... $\pi$ | 3.27            | 0.0072 | 0.0234 | 0.0048  | -0.0038 | 0.0010  |         |
| 13              | lp... $\pi$     | 3.16            | 0.0060 | 0.0258 | 0.0052  | -0.0039 | 0.0013  |         |
| 14              | $\pi$ ... $\pi$ | 3.41            | 0.0065 | 0.0185 | 0.0038  | -0.0031 | 0.0007  |         |
| 15              | C-H...F         | 2.60            | 0.0072 | 0.0340 | 0.0068  | -0.0050 | 0.0018  |         |

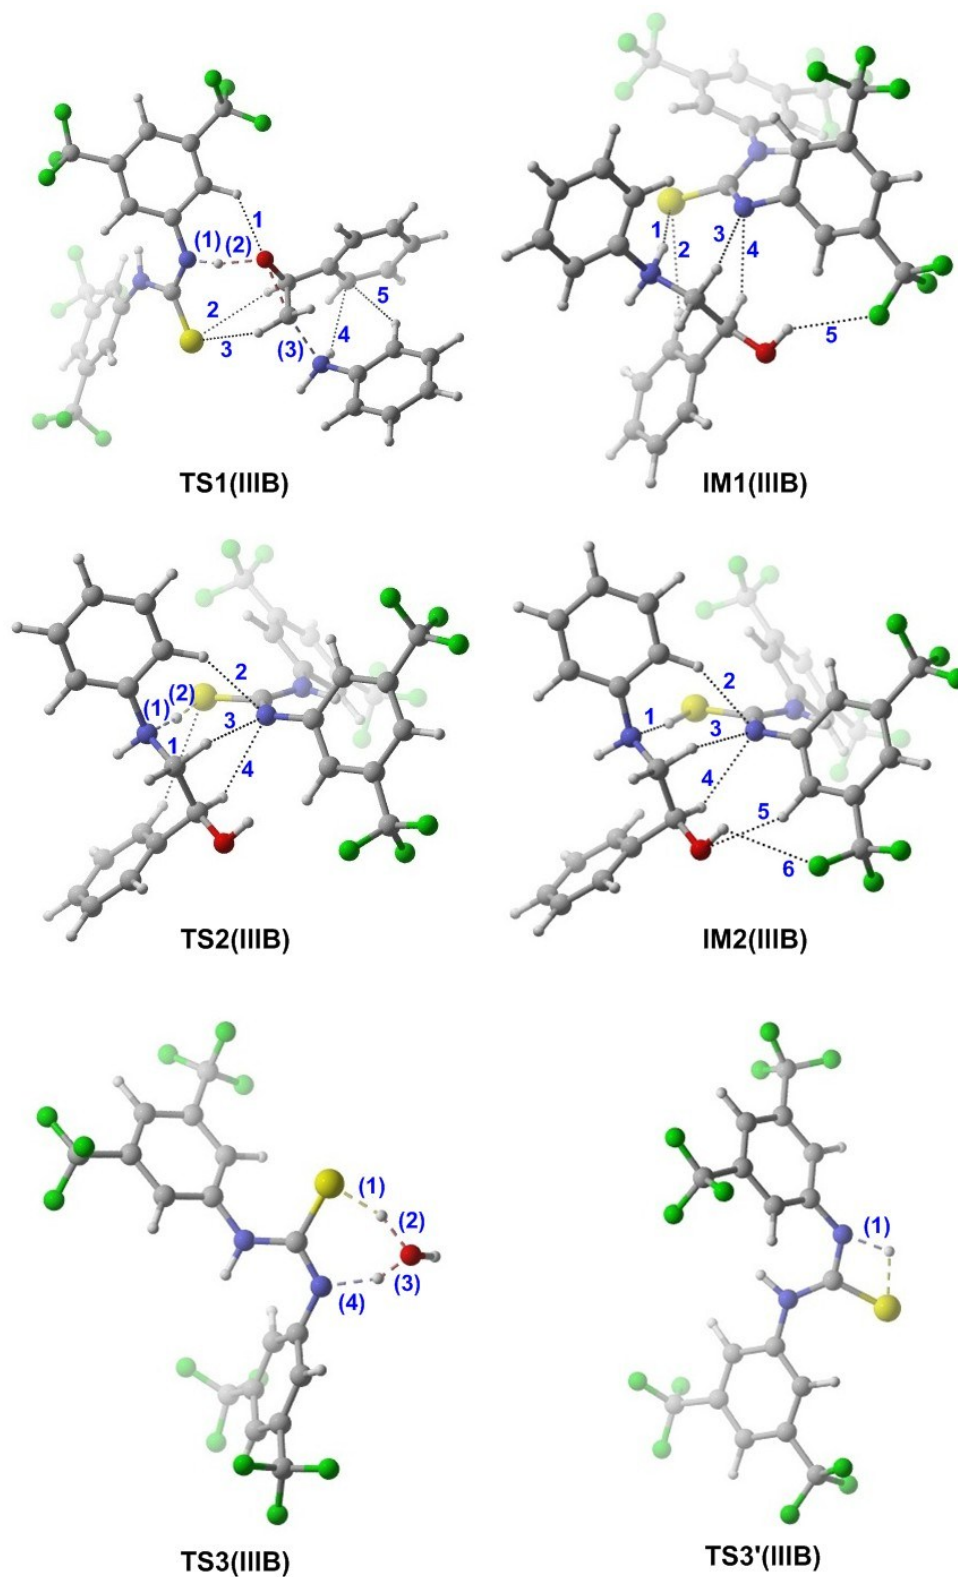

**Fig. S6** Intermolecular interactions in **TS1(IIIB)**, **IM1(IIIB)**, **TS2(IIIB)**, **IM2(IIIB)**, **TS3(IIIB)** and **TS3'(IIIB)**, and numbers of bond critical points (BCPs No.) The BCPs No. of TSs are in parentheses.

**Table S5** Numbers of Bond Critical Point (BCPs No.) and the corresponding distances between atoms ( $d$ , in Å), classifications of the intermolecular interactions, electron density ( $\rho$ , in a.u.) and its Laplacian value ( $\nabla^2\rho$ , in a.u.), the electronic kinetic energy density ( $G$ , in a.u.), the electronic potential energy density ( $V$ , in a.u.) and the electronic energy density ( $H$ , in a.u.) at the BCPs of **TS1(IIIB)**, **IM1(IIIB)**, **TS2(IIIB)**, **IM2(IIIB)**, **TS3(IIIB)** and **TS3'(IIIB)**.

|                   | BCPs No. | Classification | $d$  | $\rho$ | $\nabla^2\rho$ | $G$    | $V$     | $H$     |
|-------------------|----------|----------------|------|--------|----------------|--------|---------|---------|
| <b>TS1(IIIB)</b>  | 1        | C-H...O        | 2.31 | 0.0144 | 0.0460         | 0.0113 | -0.0110 | 0.0003  |
|                   | 2        | C-H...S        | 2.90 | 0.0092 | 0.0278         | 0.0058 | -0.0046 | 0.0012  |
|                   | 3        | C-H...S        | 2.75 | 0.0115 | 0.0346         | 0.0073 | -0.0060 | 0.0013  |
|                   | 4        | N-H... $\pi$   | 2.63 | 0.0085 | 0.0294         | 0.0061 | -0.0048 | 0.0013  |
|                   | 5        | C-H... $\pi$   | 2.82 | 0.0070 | 0.0225         | 0.0047 | -0.0037 | 0.0010  |
|                   | (1)      | N...H          | 1.09 | 0.2688 | -1.3228        | 0.0511 | -0.4328 | -0.3817 |
|                   | (2)      | H...O          | 1.52 | 0.0766 | 0.1496         | 0.0559 | -0.0743 | -0.0186 |
|                   | (3)      | C...N          | 1.95 | 0.0846 | 0.0962         | 0.0483 | -0.0725 | -0.0242 |
| <b>IM1(IIIB)</b>  | 1        | N-H...S        | 1.98 | 0.0516 | 0.0403         | 0.0219 | -0.0336 | -0.0117 |
|                   | 2        | C-H...S        | 3.09 | 0.0061 | 0.0171         | 0.0034 | -0.0025 | 0.0009  |
|                   | 3        | C-H...N        | 2.48 | 0.0138 | 0.0471         | 0.0104 | -0.0091 | 0.0013  |
|                   | 4        | C-H...N        | 2.52 | 0.0123 | 0.0371         | 0.0085 | -0.0078 | 0.0007  |
|                   | 5        | O-H...F        | 2.51 | 0.0094 | 0.0390         | 0.0079 | -0.0061 | 0.0018  |
| <b>TS2(IIIB)</b>  | 1        | C-H...S        | 3.16 | 0.0050 | 0.0149         | 0.0029 | -0.0021 | 0.0008  |
|                   | 2        | C-H...N        | 2.57 | 0.0098 | 0.0279         | 0.0065 | -0.0060 | 0.0005  |
|                   | 3        | C-H...N        | 2.50 | 0.0129 | 0.0430         | 0.0095 | -0.0083 | 0.0012  |
|                   | 4        | C-H...N        | 2.50 | 0.0125 | 0.0377         | 0.0086 | -0.0079 | 0.0007  |
|                   | (1)      | N...H          | 1.44 | 0.1113 | -0.0228        | 0.0518 | -0.1092 | -0.0574 |
|                   | (2)      | H...S          | 1.55 | 0.1372 | -0.2127        | 0.0304 | -0.1140 | -0.0836 |
| <b>IM2(IIIB)</b>  | 1        | S-H...N        | 1.84 | 0.0437 | 0.0803         | 0.0239 | -0.0277 | -0.0038 |
|                   | 2        | C-H...N        | 2.61 | 0.0090 | 0.0264         | 0.0060 | -0.0054 | 0.0006  |
|                   | 3        | C-H...N        | 2.59 | 0.0107 | 0.0359         | 0.0078 | -0.0067 | 0.0011  |
|                   | 4        | C-H...N        | 2.51 | 0.0120 | 0.0356         | 0.0082 | -0.0075 | 0.0007  |
|                   | 5        | C-H...O        | 2.47 | 0.0105 | 0.0405         | 0.0087 | -0.0073 | 0.0014  |
|                   | 6        | O-H...F        | 2.75 | 0.0033 | 0.0201         | 0.0037 | -0.0023 | 0.0014  |
| <b>TS3(IIIB)</b>  | (1)      | S...H          | 1.60 | 0.0814 | 0.0867         | 0.0492 | -0.0768 | -0.0276 |
|                   | (2)      | H...O          | 1.26 | 0.2656 | -1.2614        | 0.0796 | -0.4745 | -0.3949 |
|                   | (3)      | O...H          | 1.05 | 0.1514 | -0.2256        | 0.0826 | -0.2216 | -0.1390 |
|                   | (4)      | H...N          | 1.53 | 0.1215 | -0.1518        | 0.0312 | -0.1004 | -0.0692 |
| <b>TS3'(IIIB)</b> | (1)      | N...H          | 1.40 | 0.1184 | -0.0330        | 0.0606 | -0.1294 | -0.0688 |

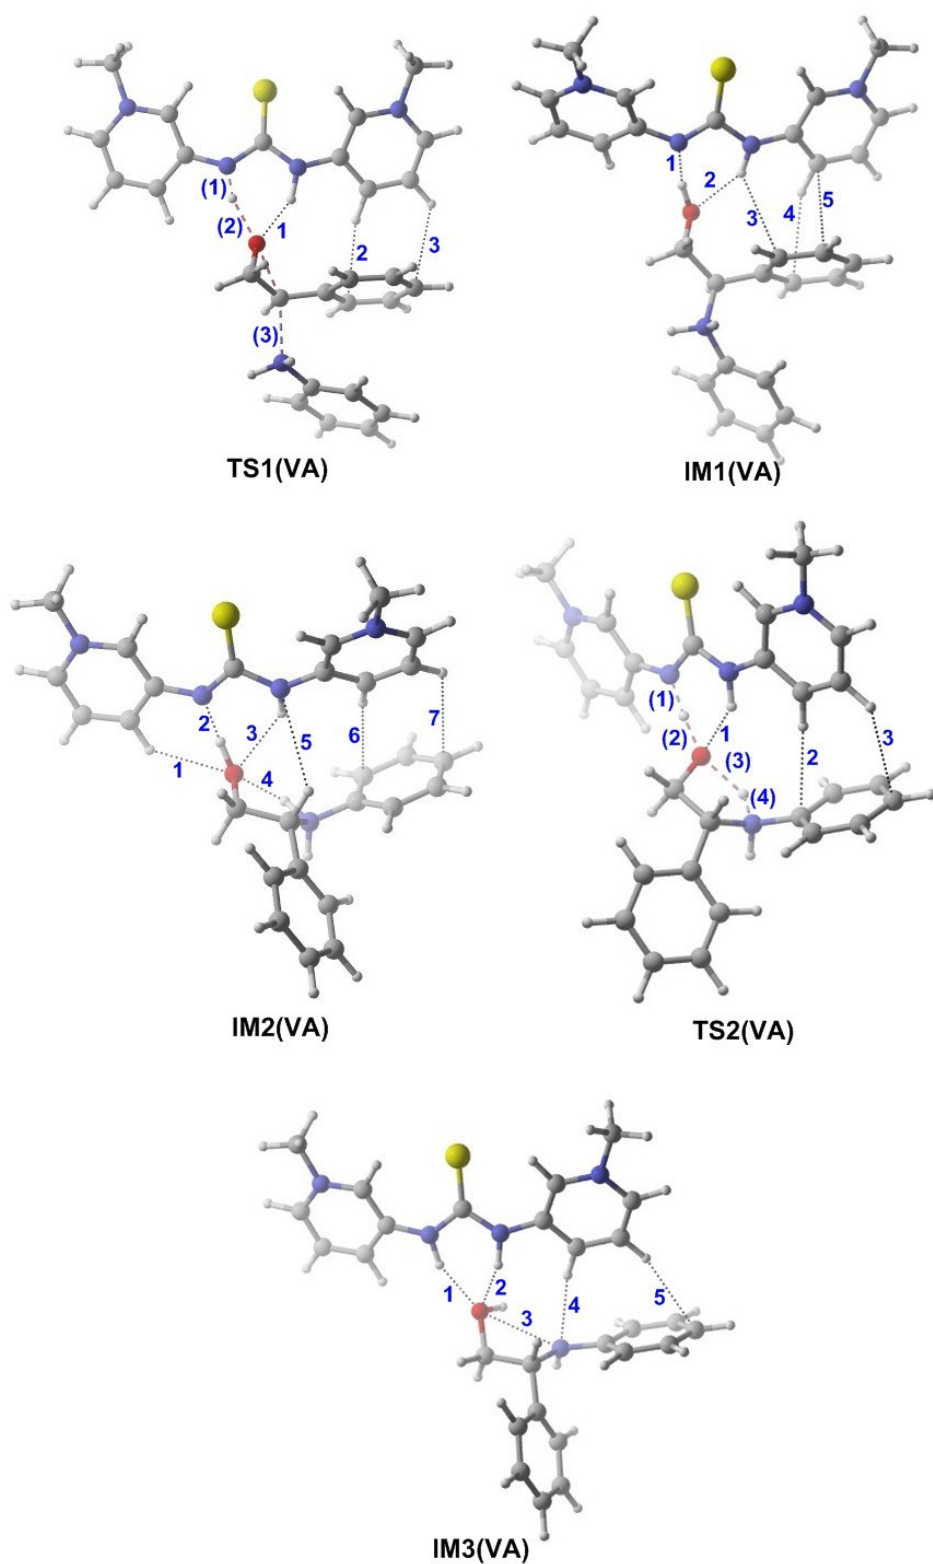

**Fig. S7** Intermolecular interactions in TS1(VA), IM1(VA), IM2(VA), TS2(VA) and IM3(VA), and numbers of bond critical points (BCPs No.) The BCPs No. of TSs are in parentheses.

**Table S6** Numbers of Bond Critical Point (BCPs No.) and the corresponding distances between atoms ( $d$ , in Å), classifications of the intermolecular interactions, electron density ( $\rho$ , in a.u.) and its Laplacian value ( $\nabla^2\rho$ , in a.u.), the electronic kinetic energy density ( $G$ , in a.u.), the electronic potential energy density ( $V$ , in a.u.) and the electronic energy density ( $H$ , in a.u.) at the BCPs of **TS1(VA)**, **IM1(VA)**, **IM2(VA)**, **TS2(VA)** and **IM3(VA)**.

|                | BCPs No. | Classification  | $d$  | $\rho$ | $\nabla^2\rho$ | $G$    | $V$     | $H$     |
|----------------|----------|-----------------|------|--------|----------------|--------|---------|---------|
| <b>TS1(VA)</b> | 1        | N-H...O         | 1.77 | 0.0400 | 0.1178         | 0.0308 | -0.0322 | -0.0014 |
|                | 2        | C-H... $\pi$    | 2.65 | 0.0088 | 0.0278         | 0.0059 | -0.0049 | 0.0010  |
|                | 3        | C-H... $\pi$    | 2.97 | 0.0050 | 0.0163         | 0.0032 | -0.0022 | 0.0010  |
|                | (1)      | N...H           | 1.05 | 0.3030 | -1.5854        | 0.0477 | -0.4917 | -0.4440 |
|                | (2)      | H...O           | 1.63 | 0.0545 | 0.1531         | 0.0424 | -0.0465 | -0.0041 |
|                | (3)      | C...N           | 2.18 | 0.0540 | 0.0973         | 0.0315 | -0.0387 | -0.0072 |
| <b>IM1(VA)</b> | 1        | O-H...N         | 1.61 | 0.0680 | 0.1073         | 0.0423 | -0.0578 | -0.0155 |
|                | 2        | N-H...O         | 2.08 | 0.0207 | 0.0650         | 0.0166 | -0.0170 | -0.0004 |
|                | 3        | N-H... $\pi$    | 3.02 | 0.0043 | 0.0146         | 0.0029 | -0.0021 | 0.0008  |
|                | 4        | C-H... $\pi$    | 2.82 | 0.0065 | 0.0212         | 0.0044 | -0.0034 | 0.0009  |
|                | 5        | $\pi$ ... $\pi$ | 3.36 | 0.0066 | 0.0211         | 0.0042 | -0.0032 | 0.0010  |
| <b>IM2(VA)</b> | 1        | C-H...O         | 2.52 | 0.0098 | 0.0408         | 0.0085 | -0.0068 | 0.0017  |
|                | 2        | O-H...N         | 1.53 | 0.0828 | 0.0841         | 0.0497 | -0.0784 | -0.0287 |
|                | 3        | N-H...O         | 2.31 | 0.0142 | 0.0534         | 0.0124 | -0.0114 | 0.0010  |
|                | 4        | N-H...O         | 1.78 | 0.0408 | 0.1375         | 0.0352 | -0.0359 | -0.0007 |
|                | 5        | C-H...N         | 2.97 | 0.0049 | 0.0179         | 0.0035 | -0.0026 | 0.0009  |
|                | 6        | C-H... $\pi$    | 2.78 | 0.0070 | 0.0216         | 0.0045 | -0.0036 | 0.0009  |
|                | 7        | C-H... $\pi$    | 3.13 | 0.0037 | 0.0118         | 0.0023 | -0.0016 | 0.0007  |
| <b>TS2(VA)</b> | 1        | N-H...O         | 2.02 | 0.0253 | 0.0722         | 0.0195 | -0.0210 | -0.0015 |
|                | 2        | C-H... $\pi$    | 2.71 | 0.0082 | 0.0246         | 0.0053 | -0.0044 | 0.0009  |
|                | 3        | C-H... $\pi$    | 3.09 | 0.0035 | 0.0113         | 0.0021 | -0.0015 | 0.0006  |
|                | (1)      | N...H           | 1.23 | 0.1792 | -0.5425        | 0.0685 | -0.2726 | -0.2041 |
|                | (2)      | H...O           | 1.23 | 0.1586 | -0.2697        | 0.0929 | -0.2532 | -0.1603 |
|                | (3)      | O...H           | 1.60 | 0.0636 | 0.1703         | 0.0502 | -0.0578 | -0.0076 |
|                | (4)      | H...N           | 1.07 | 0.2894 | -1.4950        | 0.0462 | -0.4663 | -0.4201 |
|                |          |                 |      |        |                |        |         |         |
| <b>IM3(VA)</b> | 1        | N-H...O         | 1.97 | 0.0246 | 0.0756         | 0.0197 | -0.0204 | -0.0007 |
|                | 2        | N-H...O         | 1.89 | 0.0314 | 0.0909         | 0.0241 | -0.0254 | -0.0013 |
|                | 3        | lp...lp         | 2.75 | 0.0188 | 0.0741         | 0.0170 | -0.0156 | 0.0014  |
|                | 4        | C-H...N         | 2.37 | 0.0142 | 0.0408         | 0.0101 | -0.0100 | 0.0001  |
|                | 5        | C-H... $\pi$    | 2.69 | 0.0082 | 0.0251         | 0.0054 | -0.0045 | 0.0009  |

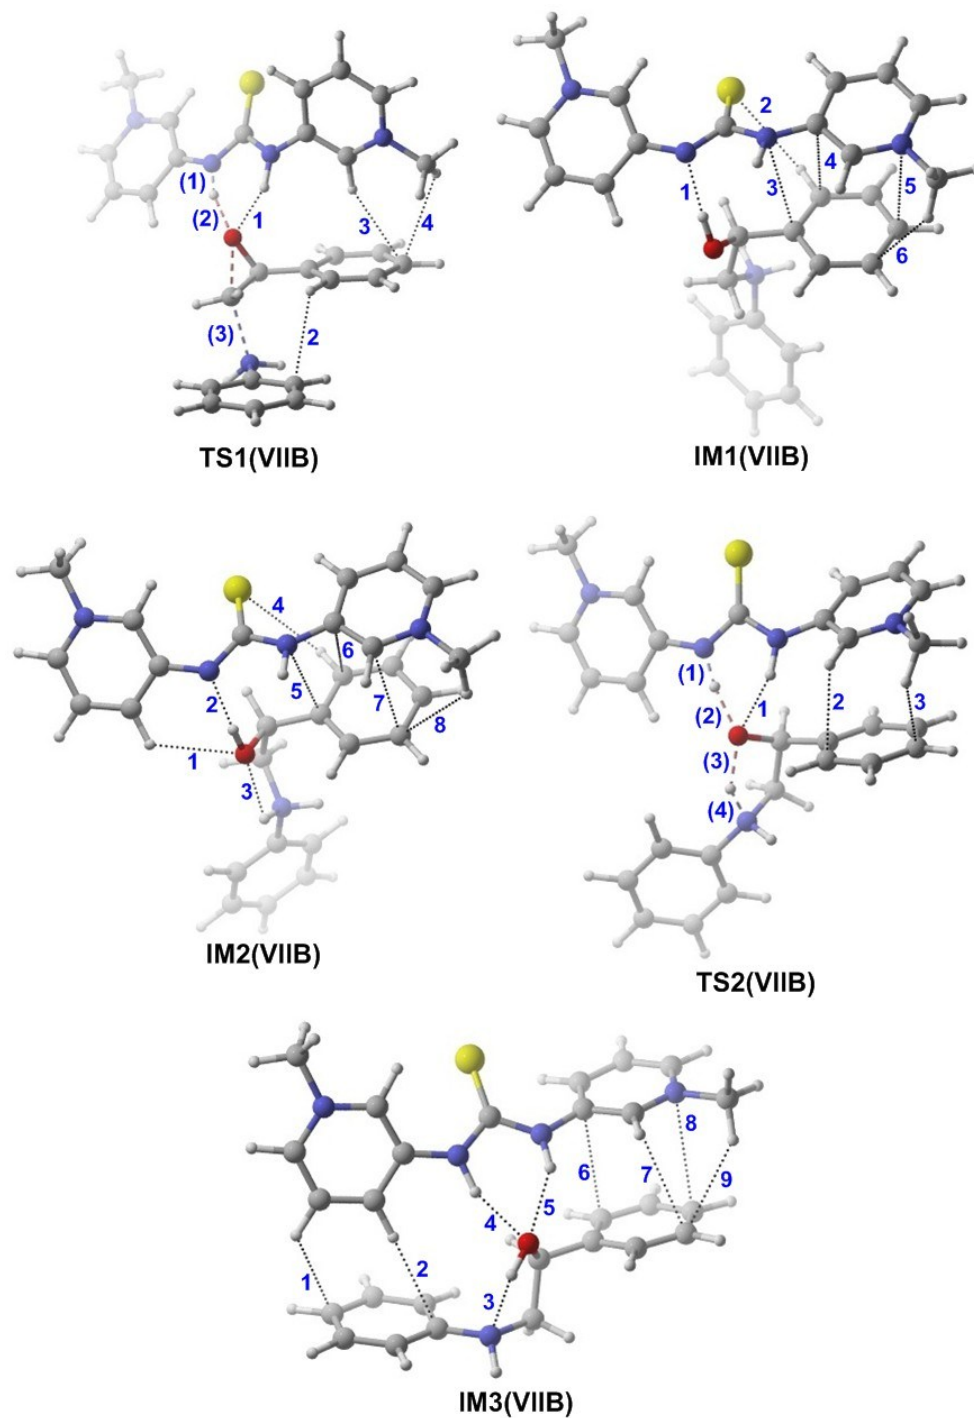

**Fig. S8** Intermolecular interactions in **TS1(VIIB)**, **IM1(VIIB)**, **IM2(VIIB)**, **TS2(VIIB)** and **IM3(VIIB)**, and numbers of bond critical points (BCPs No.) The BCPs No. of TSs are in parentheses.

**Table S7** Numbers of Bond Critical Point (BCPs No.) and the corresponding distances between atoms ( $d$ , in Å), classifications of the intermolecular interactions, electron density ( $\rho$ , in a.u.) and its Laplacian value ( $\nabla^2\rho$ , in a.u.), the electronic kinetic energy density ( $G$ , in a.u.), the electronic potential energy density ( $V$ , in a.u.) and the electronic energy density ( $H$ , in a.u.) at the BCPs of **TS1(VIIB)**, **IM1(VIIB)**, **IM2(VIIB)**, **TS2(VIIB)** and **IM3(VIIB)**.

|                  | BCPs No. | Classification  | $d$  | $\rho$ | $\nabla^2\rho$ | $G$    | $V$     | $H$     |
|------------------|----------|-----------------|------|--------|----------------|--------|---------|---------|
| <b>TS1(VIIB)</b> | 1        | N-H...O         | 1.78 | 0.0388 | 0.1143         | 0.0300 | -0.0314 | -0.0014 |
|                  | 2        | C-H... $\pi$    | 2.88 | 0.0058 | 0.0186         | 0.0037 | -0.0027 | 0.0010  |
|                  | 3        | C-H... $\pi$    | 2.75 | 0.0076 | 0.0249         | 0.0053 | -0.0043 | 0.00010 |
|                  | 4        | C-H... $\pi$    | 2.96 | 0.0054 | 0.0170         | 0.0034 | -0.0025 | 0.0009  |
|                  | (1)      | N...H           | 1.05 | 0.3055 | -1.6088        | 0.0469 | -0.4960 | -0.4491 |
|                  | (2)      | H...O           | 1.65 | 0.0518 | 0.1475         | 0.0402 | -0.0434 | -0.0032 |
|                  | (3)      | C...N           | 2.06 | 0.0681 | 0.1036         | 0.0395 | -0.0531 | -0.0136 |
| <b>IM1(VIIB)</b> | 1        | O-H...N         | 1.79 | 0.0439 | 0.1004         | 0.0287 | -0.0323 | -0.0036 |
|                  | 2        | C-H...S         | 3.08 | 0.0064 | 0.0186         | 0.0037 | -0.0027 | 0.0010  |
|                  | 3        | lp... $\pi$     | 3.27 | 0.0074 | 0.0213         | 0.0048 | -0.0043 | 0.0005  |
|                  | 4        | $\pi$ ... $\pi$ | 3.27 | 0.0069 | 0.0210         | 0.0043 | -0.0034 | 0.0009  |
|                  | 5        | $\pi$ ... $\pi$ | 3.34 | 0.0066 | 0.0199         | 0.0042 | -0.0035 | 0.0007  |
|                  | 6        | C-H... $\pi$    | 2.88 | 0.0055 | 0.0175         | 0.0035 | -0.0025 | 0.0010  |
| <b>IM2(VIIB)</b> | 1        | C-H...O         | 2.63 | 0.0076 | 0.0322         | 0.0065 | -0.0049 | 0.0016  |
|                  | 2        | O-H...N         | 1.80 | 0.0427 | 0.0965         | 0.0275 | -0.0309 | -0.0034 |
|                  | 3        | N-H...O         | 2.15 | 0.0195 | 0.0831         | 0.0190 | -0.0173 | 0.0017  |
|                  | 4        | C-H...S         | 3.42 | 0.0041 | 0.0115         | 0.0023 | -0.0017 | 0.0006  |
|                  | 5        | lp... $\pi$     | 3.20 | 0.0082 | 0.0236         | 0.0054 | -0.0048 | 0.0006  |
|                  | 6        | $\pi$ ... $\pi$ | 3.39 | 0.0061 | 0.0168         | 0.0035 | -0.0027 | 0.0008  |
|                  | 7        | $\pi$ ... $\pi$ | 3.26 | 0.0076 | 0.0210         | 0.0044 | -0.0036 | 0.0008  |
|                  | 8        | C-H... $\pi$    | 3.13 | 0.0035 | 0.0124         | 0.0025 | -0.0018 | 0.0007  |
| <b>TS2(VIIB)</b> | 1        | N-H...O         | 2.08 | 0.0224 | 0.0670         | 0.0180 | -0.0192 | -0.0012 |
|                  | 2        | C-H... $\pi$    | 2.90 | 0.0073 | 0.0232         | 0.0046 | -0.0033 | 0.0013  |
|                  | 3        | C-H... $\pi$    | 2.89 | 0.0062 | 0.0196         | 0.0039 | -0.0029 | 0.0010  |
|                  | (1)      | N...H           | 1.09 | 0.2661 | -1.2922        | 0.0532 | -0.4294 | -0.3762 |
|                  | (2)      | H...O           | 1.48 | 0.0820 | 0.1502         | 0.0606 | -0.0837 | -0.0231 |
|                  | (3)      | O...H           | 1.45 | 0.0944 | 0.1334         | 0.0669 | -0.1004 | -0.0335 |
|                  | (4)      | H...N           | 1.13 | 0.2425 | -1.1023        | 0.0554 | -0.3863 | -0.3309 |
|                  | 4        | C-H... $\pi$    | 3.13 | 0.0035 | 0.0124         | 0.0025 | -0.0018 | 0.0007  |
| <b>IM3(VIIB)</b> | 1        | C-H... $\pi$    | 2.88 | 0.0061 | 0.0194         | 0.0038 | -0.0027 | 0.0011  |
|                  | 2        | C-H... $\pi$    | 2.67 | 0.0088 | 0.0269         | 0.0059 | -0.0050 | 0.0009  |
|                  | 3        | O-H...N         | 1.92 | 0.0359 | 0.1005         | 0.0273 | -0.0295 | -0.0022 |
|                  | 4        | N-H...O         | 1.86 | 0.0332 | 0.0963         | 0.0254 | -0.0266 | -0.0012 |
|                  | 5        | N-H...O         | 2.00 | 0.0229 | 0.0749         | 0.0192 | -0.0198 | -0.0006 |
|                  | 6        | $\pi$ ... $\pi$ | 3.32 | 0.0069 | 0.0202         | 0.0042 | -0.0033 | 0.0009  |
|                  | 7        | C-H... $\pi$    | 3.38 | 0.0065 | 0.0189         | 0.0039 | -0.0030 | 0.0009  |
|                  | 8        | $\pi$ ... $\pi$ | 3.33 | 0.0065 | 0.0191         | 0.0042 | -0.0036 | 0.0006  |
|                  | 9        | C-H... $\pi$    | 2.79 | 0.0065 | 0.0208         | 0.0041 | -0.0031 | 0.0010  |

## 7. Cartesian coordinates

### R1

|   |             |             |             |
|---|-------------|-------------|-------------|
| C | 2.56026000  | -0.00021800 | 0.74564300  |
| C | 1.60079400  | 0.59131300  | -0.20612200 |
| O | 2.46398000  | -0.46574000 | -0.58851300 |
| H | 2.17630800  | -0.67966900 | 1.50472300  |
| H | 3.47790000  | 0.52972000  | 0.99216300  |
| H | 1.85137900  | 1.55971500  | -0.63999600 |
| C | 0.14691700  | 0.27651400  | -0.12114900 |
| C | -0.28331400 | -1.05058000 | -0.08857400 |
| C | -0.79086400 | 1.30644300  | -0.05384200 |
| C | -1.63856600 | -1.34146500 | 0.02356400  |
| H | 0.45528800  | -1.84203100 | -0.17358600 |
| C | -2.14663600 | 1.01394900  | 0.06080100  |
| H | -0.45730200 | 2.34042800  | -0.09161800 |
| C | -2.57291200 | -0.31078500 | 0.10166700  |
| H | -1.96862400 | -2.37534900 | 0.04328800  |
| H | -2.87044000 | 1.82104000  | 0.11389100  |
| H | -3.63042500 | -0.53896400 | 0.18732000  |

### R2

|   |             |             |             |
|---|-------------|-------------|-------------|
| N | 2.32895000  | -0.00002300 | -0.07626000 |
| H | 2.76643200  | -0.83547200 | 0.28494500  |
| H | 2.76642300  | 0.83553600  | 0.28468800  |
| C | 0.93515400  | -0.00005500 | -0.01036000 |
| C | 0.22128600  | -1.20489600 | -0.00614600 |
| C | 0.22128700  | 1.20490700  | -0.00618600 |
| C | -1.16804800 | -1.19928500 | 0.00350700  |
| H | 0.76521900  | -2.14574700 | -0.01576500 |
| C | -1.16793200 | 1.19934400  | 0.00356400  |
| H | 0.76535800  | 2.14568000  | -0.01575900 |
| C | -1.87555100 | -0.00000700 | 0.00914600  |
| H | -1.70175300 | -2.14485600 | 0.00824500  |
| H | -1.70171500 | 2.14487100  | 0.00826300  |
| H | -2.95978900 | 0.00010200  | 0.01805000  |

### H2O

|   |            |             |             |
|---|------------|-------------|-------------|
| O | 0.00000000 | 0.00000000  | 0.11779300  |
| H | 0.00000000 | 0.76021000  | -0.47117300 |
| H | 0.00000000 | -0.76021000 | -0.47117300 |



**A**

|   |             |             |             |
|---|-------------|-------------|-------------|
| O | -0.58614500 | 3.63790600  | 0.21685000  |
| C | -0.61566900 | 1.21324600  | 0.27386000  |
| C | -1.34268600 | 2.50527700  | -0.11892100 |
| C | -1.50121400 | -0.00236900 | 0.05283900  |
| C | -2.57776500 | -0.21498500 | 0.91822100  |
| C | -3.44602200 | -1.28294000 | 0.72532200  |
| C | -3.24537100 | -2.15863300 | -0.33970300 |
| C | -2.17119800 | -1.96003900 | -1.20084500 |
| C | -1.30332200 | -0.88759800 | -1.00550500 |
| H | -0.38778900 | 1.29948600  | 1.34405400  |
| H | -1.56796400 | 2.46069600  | -1.19963300 |
| H | -2.29814800 | 2.56821200  | 0.40899100  |
| H | -2.73168200 | 0.46457400  | 1.75392800  |
| H | -4.27633600 | -1.43530400 | 1.40750600  |
| H | -3.91965800 | -2.99504700 | -0.49261000 |
| H | -2.00192900 | -2.64491200 | -2.02575500 |
| H | -0.45448800 | -0.75327700 | -1.66970400 |
| N | 0.65184300  | 1.22051900  | -0.43476700 |
| H | 0.54151700  | 1.35432400  | -1.43478300 |
| H | 0.33126200  | 3.41677400  | 0.00300600  |
| C | 1.66983300  | 0.30381700  | -0.12370400 |
| C | 1.61288500  | -0.53756100 | 0.99231300  |
| C | 2.80361700  | 0.26004800  | -0.94750400 |
| C | 2.68024500  | -1.38504200 | 1.27952300  |
| H | 0.73291900  | -0.55177500 | 1.62539500  |
| C | 3.85438700  | -0.59736100 | -0.65794200 |
| H | 2.85518200  | 0.91872600  | -1.81075300 |
| C | 3.80433100  | -1.42492600 | 0.46290300  |
| H | 2.61959400  | -2.03042900 | 2.15034600  |
| H | 4.72313200  | -0.61302400 | -1.30862700 |
| H | 4.62834300  | -2.09150400 | 0.69205900  |

**B**

|   |             |             |             |
|---|-------------|-------------|-------------|
| O | 0.82257600  | -1.78379100 | 1.14785600  |
| C | 0.80080800  | -0.51419700 | 0.54252900  |
| C | 0.02732600  | -0.60770600 | -0.78600500 |
| C | 2.20949500  | -0.04256400 | 0.27878300  |
| C | 2.46041300  | 1.31593200  | 0.08055400  |
| C | 3.74077900  | 1.75933100  | -0.23441400 |
| C | 4.78460900  | 0.84428800  | -0.34873400 |
| C | 4.53980300  | -0.51132900 | -0.14614800 |
| C | 3.25707800  | -0.95547200 | 0.16351000  |
| H | 0.29799400  | 0.21362000  | 1.20049300  |
| H | 0.59780200  | -1.27531400 | -1.43855200 |
| H | -0.02690800 | 0.37436300  | -1.27557900 |
| H | 1.64772500  | 2.03249200  | 0.18317900  |
| H | 3.92564700  | 2.81853200  | -0.38313500 |
| H | 5.78566300  | 1.18794900  | -0.58895900 |
| H | 5.35206500  | -1.22701500 | -0.22752100 |
| H | 3.05335400  | -2.00677500 | 0.33490500  |
| N | -1.28809800 | -1.19312100 | -0.57695800 |
| H | -1.50506000 | -1.94647200 | -1.21371000 |
| H | -0.08436000 | -2.11490200 | 1.07343100  |
| C | -2.40151100 | -0.38714600 | -0.30445500 |
| C | -3.68504900 | -0.93995200 | -0.42823000 |
| C | -2.28210100 | 0.94311800  | 0.11496800  |
| C | -4.81211300 | -0.18362400 | -0.14548500 |
| H | -3.78745500 | -1.97365100 | -0.74898300 |
| C | -3.42181100 | 1.69164400  | 0.39884000  |
| H | -1.30517500 | 1.40010000  | 0.22464400  |
| C | -4.69129500 | 1.14117500  | 0.27239800  |
| H | -5.79411300 | -0.63364100 | -0.25360700 |
| H | -3.30659000 | 2.72116600  | 0.72356000  |
| H | -5.57308600 | 1.73073200  | 0.49702400  |

**Cat-I(anti-anti)**

|   |             |             |             |
|---|-------------|-------------|-------------|
| C | -5.18802400 | 0.08629000  | -0.16741400 |
| C | -4.74360000 | -0.89350700 | 0.70592600  |
| C | -3.39416500 | -1.22672200 | 0.78178700  |
| C | -2.47244800 | -0.58509400 | -0.03978600 |
| C | -2.90716900 | 0.39316300  | -0.93921500 |
| C | -4.25349000 | 0.72246000  | -0.98188200 |
| N | -1.12778300 | -1.00622900 | 0.00993100  |
| C | -0.00049100 | -0.21497700 | 0.00011700  |
| N | 1.12546700  | -1.00712400 | -0.04270200 |
| S | 0.00155000  | 1.43808300  | 0.03793100  |
| C | 2.47054800  | -0.58858700 | 0.02033500  |
| C | 2.90952700  | 0.34489200  | 0.96418800  |
| C | 4.25598000  | 0.67174400  | 1.01612300  |
| C | 5.18653100  | 0.07589500  | 0.16728300  |
| C | 4.73794500  | -0.85989000 | -0.75092400 |
| C | 3.38796400  | -1.18915300 | -0.83619700 |
| C | -4.71658100 | 1.81535600  | -1.90762500 |
| F | -3.90936900 | 1.93850900  | -2.96846600 |
| F | -4.74566400 | 3.00112400  | -1.28695800 |
| F | -5.95539500 | 1.57523700  | -2.35977300 |
| C | -5.70906000 | -1.64429400 | 1.57992700  |
| F | -6.93183100 | -1.10501400 | 1.55510600  |
| F | -5.29358600 | -1.66556200 | 2.85455900  |
| F | -5.82052800 | -2.92294300 | 1.18898700  |
| C | 5.69975900  | -1.56879400 | -1.66323600 |
| F | 6.91658200  | -1.01650100 | -1.63533400 |
| F | 5.26734500  | -1.55074000 | -2.93231500 |
| F | 5.83133300  | -2.85861100 | -1.31816800 |
| C | 4.72621200  | 1.71793800  | 1.99077700  |
| F | 3.91345400  | 1.80721300  | 3.05070100  |
| F | 4.77635200  | 2.92832400  | 1.42095500  |
| F | 5.95841000  | 1.44176400  | 2.44041600  |
| H | -6.23883600 | 0.34527000  | -0.22088700 |
| H | -3.06443600 | -1.98221100 | 1.48994900  |
| H | -2.20247100 | 0.88262600  | -1.59870800 |
| H | -0.99781100 | -1.94928800 | 0.35299700  |
| H | 0.99433000  | -1.93336900 | -0.42843800 |
| H | 2.20783600  | 0.80160100  | 1.64986500  |
| H | 6.23763600  | 0.33222000  | 0.22889700  |
| H | 3.05462200  | -1.90822800 | -1.57965400 |

**Cat-I(syn-anti)**

|   |             |             |             |
|---|-------------|-------------|-------------|
| C | 4.36449900  | 0.61464800  | 0.51438400  |
| C | 4.51071600  | -0.29808800 | -0.52263900 |
| C | 3.51002800  | -1.21492900 | -0.81958400 |
| C | 2.34314000  | -1.24571100 | -0.05290700 |
| C | 2.19574900  | -0.34953100 | 1.01226400  |
| C | 3.19759300  | 0.57836600  | 1.27019900  |
| N | 1.37232800  | -2.22426800 | -0.34306600 |
| C | 0.00376800  | -2.11789500 | -0.38890600 |
| N | -0.45905500 | -0.83866800 | -0.27077500 |
| S | -0.91675600 | -3.48235900 | -0.62519900 |
| C | -1.79637000 | -0.39170300 | -0.27878800 |
| C | -2.82769600 | -1.08552000 | 0.36072900  |
| C | -4.10867300 | -0.55215100 | 0.34834600  |
| C | -4.39020300 | 0.66815300  | -0.25999400 |
| C | -3.35138000 | 1.35387900  | -0.87070200 |
| C | -2.06302400 | 0.83036500  | -0.89198800 |
| C | 2.99418400  | 1.58656500  | 2.37040900  |
| F | 2.25340400  | 1.08318800  | 3.36486600  |
| F | 2.35786900  | 2.67382600  | 1.91286400  |
| F | 4.16030200  | 1.99142600  | 2.88415100  |
| C | 5.77444900  | -0.32558000 | -1.34123200 |
| F | 6.49604300  | 0.78705900  | -1.17408800 |
| F | 5.49921100  | -0.44895900 | -2.64663000 |
| F | 6.54688000  | -1.36574300 | -1.00202700 |
| C | -3.57968800 | 2.70050000  | -1.49932800 |
| F | -4.88082300 | 2.98266500  | -1.61953400 |
| F | -3.02875400 | 2.76577500  | -2.72028800 |
| F | -3.01931100 | 3.67549000  | -0.76854000 |
| C | -5.23151200 | -1.33391800 | 0.97575800  |
| F | -4.79602100 | -2.10307100 | 1.98123000  |
| F | -5.82192800 | -2.13923700 | 0.08364100  |
| F | -6.17994500 | -0.52034600 | 1.46111200  |
| H | 5.14410300  | 1.33535600  | 0.73144500  |
| H | 3.62820800  | -1.90129900 | -1.65266100 |
| H | 1.31874000  | -0.39414300 | 1.64963600  |
| H | 1.69852500  | -3.14580300 | -0.60140700 |
| H | 0.22545000  | -0.10440500 | -0.40575400 |
| H | -2.63149000 | -2.02523700 | 0.85877800  |
| H | -5.39422300 | 1.07551300  | -0.24956700 |
| H | -1.26993800 | 1.37495700  | -1.39732000 |

**Cat-I(syn-syn)**

|   |             |             |             |
|---|-------------|-------------|-------------|
| C | 1.18433700  | -1.10707600 | -1.49919600 |
| C | 2.29274200  | -0.48367600 | -0.94482800 |
| C | 2.27679200  | 0.87640500  | -0.64638700 |
| C | 1.14228600  | 1.63049500  | -0.93441900 |
| C | 0.05529600  | 1.03417300  | -1.57818700 |
| C | 0.07004800  | -0.33120600 | -1.81392900 |
| N | 1.07484800  | 2.96942800  | -0.48912300 |
| C | 0.00065800  | 3.66833600  | -0.00062600 |
| N | -1.07403000 | 2.97007800  | 0.48774300  |
| S | 0.00124900  | 5.33368800  | -0.00053800 |
| C | -1.14197500 | 1.63139300  | 0.93372600  |
| C | -0.05517100 | 1.03502400  | 1.57777300  |
| C | -0.07030000 | -0.33024900 | 1.81409200  |
| C | -1.18480600 | -1.10592600 | 1.49968800  |
| C | -2.29301900 | -0.48244100 | 0.94502600  |
| C | -2.27670000 | 0.87751600  | 0.64602400  |
| C | -1.15065000 | -1.01231200 | -2.37195600 |
| F | -2.17235400 | -0.16044500 | -2.51875200 |
| F | -1.55946600 | -1.99771500 | -1.55369900 |
| F | -0.90488200 | -1.57228100 | -3.56123100 |
| C | 3.52677100  | -1.27866700 | -0.61124600 |
| F | 3.28522400  | -2.59312200 | -0.61530200 |
| F | 4.00507800  | -0.94760200 | 0.59495600  |
| F | 4.50475600  | -1.04331900 | -1.49802000 |
| C | -3.52717000 | -1.27732000 | 0.61162300  |
| F | -3.28581800 | -2.59182000 | 0.61597700  |
| F | -4.00540600 | -0.94646900 | -0.59466200 |
| F | -4.50513900 | -1.04163800 | 1.49832400  |
| C | 1.15026300  | -1.01144700 | 2.37230900  |
| F | 2.17220900  | -0.15979100 | 2.51861000  |
| F | 1.55874700  | -1.99734500 | 1.55447000  |
| F | 0.90447800  | -1.57075900 | 3.56188700  |
| H | 1.18158600  | -2.17867100 | -1.66561200 |
| H | 3.11612800  | 1.32993100  | -0.12724900 |
| H | -0.82069900 | 1.62291000  | -1.82484900 |
| H | 1.86905200  | 3.56728500  | -0.67701000 |
| H | -1.86782900 | 3.56844700  | 0.67572100  |
| H | 0.82101400  | 1.62359200  | 1.82416500  |
| H | -1.18235600 | -2.17745100 | 1.66655100  |
| H | -3.11587000 | 1.33103400  | 0.12661300  |

**Cat-II(anti-anti)-1**

|   |             |             |             |
|---|-------------|-------------|-------------|
| C | 5.06921500  | 0.09984700  | -0.38338400 |
| N | 4.21213100  | 0.66014400  | 0.49147500  |
| C | 2.93764700  | 0.24424000  | 0.60607100  |
| C | 2.45490400  | -0.77378000 | -0.20964800 |
| C | 3.33466500  | -1.38045900 | -1.11040700 |
| C | 4.64975000  | -0.94277100 | -1.18960600 |
| N | 1.13236300  | -1.22977000 | -0.10547900 |
| C | 4.65915900  | 1.77942700  | 1.35710500  |
| C | 0.00236700  | -0.44424300 | 0.00633200  |
| N | -1.12636000 | -1.23147400 | 0.11708500  |
| S | -0.00101500 | 1.20659700  | 0.00597100  |
| C | -2.44895900 | -0.77304600 | 0.22031900  |
| C | -2.93114700 | 0.23147200  | -0.61728000 |
| N | -4.20231900 | 0.64929100  | -0.51066900 |
| C | -5.06057600 | 0.10596700  | 0.37876100  |
| C | -4.64292900 | -0.91739400 | 1.20505300  |
| C | -3.32534300 | -1.35840400 | 1.13365900  |
| C | -4.69793100 | 1.73549600  | -1.39203300 |
| H | 6.07387200  | 0.50369500  | -0.41243600 |
| H | 2.33007200  | 0.73809200  | 1.35242100  |
| H | 2.98888100  | -2.18298500 | -1.75570100 |
| H | 5.34927000  | -1.39147200 | -1.88446000 |
| H | 0.99585900  | -2.18969300 | -0.40197600 |
| H | 5.73320700  | 1.90754000  | 1.24224800  |
| H | 4.13896100  | 2.68740700  | 1.05063100  |
| H | 4.42787200  | 1.53601500  | 2.39375300  |
| H | -0.99049200 | -2.19100500 | 0.41517900  |
| H | -2.31840400 | 0.70383500  | -1.37228200 |
| H | -6.06468700 | 0.51438000  | 0.39424400  |
| H | -5.34125200 | -1.35089100 | 1.91068700  |
| H | -2.97914200 | -2.14652100 | 1.79616100  |
| H | -3.89248100 | 2.05406700  | -2.04970100 |
| H | -5.53245700 | 1.35566700  | -1.98155600 |
| H | -5.01846700 | 2.57086000  | -0.76928000 |

**Cat-II(anti-anti)-2**

|   |             |             |             |
|---|-------------|-------------|-------------|
| C | 5.18347500  | -0.22381500 | -0.09295400 |
| N | 4.31759100  | 0.63804100  | 0.47222300  |
| C | 2.99815000  | 0.38121000  | 0.54918000  |
| C | 2.47976300  | -0.79360200 | 0.01231100  |
| C | 3.36820100  | -1.70916800 | -0.56240800 |
| C | 4.72465800  | -1.42299100 | -0.60800000 |
| N | 1.11716600  | -1.11041500 | 0.08107100  |
| C | 4.80776300  | 1.92991100  | 1.01321100  |
| C | 0.05120400  | -0.24862300 | -0.09331800 |
| N | -1.14523300 | -0.92489800 | 0.07260000  |
| S | 0.16702300  | 1.35421000  | -0.45146000 |
| C | -2.41706300 | -0.37880700 | -0.16207100 |
| C | -3.42132300 | -0.59292600 | 0.77230300  |
| N | -4.67138200 | -0.13796700 | 0.55909600  |
| C | -4.98205900 | 0.56281100  | -0.54722400 |
| C | -4.01663000 | 0.81331600  | -1.50597000 |
| C | -2.72674900 | 0.33178500  | -1.32845200 |
| C | -5.73665700 | -0.39212900 | 1.56049200  |
| H | 6.22522300  | 0.07176700  | -0.11534500 |
| H | 2.38735900  | 1.12586400  | 1.04039400  |
| H | 2.99625900  | -2.63976900 | -0.98163200 |
| H | 5.42913600  | -2.11610500 | -1.05148400 |
| H | 0.91829800  | -2.09892600 | -0.02369900 |
| H | 5.89152200  | 1.88860000  | 1.09721800  |
| H | 4.51269200  | 2.72906300  | 0.33223800  |
| H | 4.37068900  | 2.08624100  | 1.99867100  |
| H | -1.12345500 | -1.78447700 | 0.60888400  |
| H | -3.25005100 | -1.12460100 | 1.70134400  |
| H | -6.00933300 | 0.89880800  | -0.63453300 |
| H | -4.28723900 | 1.36759400  | -2.39648700 |
| H | -1.96957400 | 0.49117500  | -2.08622600 |
| H | -5.31777900 | -0.95598600 | 2.39104600  |
| H | -6.11646900 | 0.56471500  | 1.91852000  |
| H | -6.53303300 | -0.96649100 | 1.08691900  |

**Cat-II(anti-anti)-3**

|   |             |             |             |
|---|-------------|-------------|-------------|
| C | -5.06478100 | 0.46794400  | -0.58081700 |
| N | -4.74006800 | -0.44706400 | 0.34669200  |
| C | -3.46097000 | -0.83924100 | 0.52891900  |
| C | -2.44098800 | -0.33037400 | -0.25882800 |
| C | -2.76440800 | 0.61298700  | -1.24623800 |
| C | -4.08197800 | 1.01609300  | -1.39079800 |
| N | -1.13601600 | -0.81165400 | -0.07683000 |
| C | -5.78952800 | -1.05089600 | 1.20357100  |
| C | -0.00296900 | -0.01674600 | -0.00475600 |
| N | 1.13336400  | -0.80786900 | 0.04476400  |
| S | -0.00849600 | 1.62528600  | 0.01869000  |
| C | 2.43741300  | -0.33122400 | 0.24439300  |
| C | 3.46155700  | -0.83224100 | -0.54816100 |
| N | 4.73787200  | -0.44802700 | -0.35313700 |
| C | 5.06115900  | 0.45320300  | 0.59228100  |
| C | 4.07837500  | 0.99131200  | 1.40404100  |
| C | 2.75795400  | 0.59356100  | 1.24634400  |
| C | 5.82177100  | -1.01286200 | -1.19458600 |
| H | -6.11163400 | 0.73590500  | -0.65855000 |
| H | -3.28988700 | -1.56492600 | 1.31684100  |
| H | -1.99194000 | 1.01025600  | -1.89306700 |
| H | -4.36397200 | 1.74284600  | -2.14324500 |
| H | -1.05796500 | -1.75401300 | 0.28779700  |
| H | -6.73466600 | -0.54872000 | 1.00953000  |
| H | -5.87617400 | -2.11061500 | 0.96172800  |
| H | -5.51163000 | -0.91586300 | 2.24878200  |
| H | 1.05694900  | -1.74227000 | -0.34011100 |
| H | 3.28619900  | -1.54395400 | -1.34667700 |
| H | 6.11073600  | 0.71249900  | 0.67490000  |
| H | 4.35746500  | 1.70540300  | 2.16959900  |
| H | 1.98425000  | 0.98413200  | 1.89569300  |
| H | 5.38788700  | -1.68231400 | -1.93400600 |
| H | 6.33819100  | -0.19491200 | -1.69648500 |
| H | 6.51042100  | -1.56482500 | -0.55438200 |



**Cat-II(syn-anti)-1**

|   |             |             |             |
|---|-------------|-------------|-------------|
| C | 4.69968700  | -0.86313000 | 0.00972500  |
| N | 3.53764300  | -1.27009200 | -0.52315800 |
| C | 2.41783800  | -0.51431300 | -0.46728800 |
| C | 2.43089300  | 0.72105600  | 0.17211400  |
| C | 3.64626600  | 1.16188100  | 0.73092700  |
| C | 4.77548400  | 0.37088000  | 0.64286600  |
| N | 1.33166000  | 1.57662300  | 0.21491500  |
| C | 3.46004000  | -2.58118700 | -1.21343300 |
| C | -0.02383800 | 1.33943500  | 0.05959300  |
| N | -0.40238400 | 0.04765800  | 0.42127800  |
| S | -1.02660600 | 2.53500700  | -0.43709000 |
| C | -1.74501700 | -0.36680200 | 0.49210200  |
| C | -2.61505600 | -0.15335600 | -0.57603800 |
| N | -3.89882600 | -0.53719200 | -0.49249500 |
| C | -4.38746400 | -1.16212100 | 0.59964100  |
| C | -3.55720000 | -1.43365000 | 1.66829500  |
| C | -2.22773300 | -1.02612000 | 1.62151400  |
| C | -4.82585000 | -0.23178200 | -1.61055800 |
| H | 5.54592300  | -1.53277800 | -0.08475600 |
| H | 1.54181700  | -0.91524200 | -0.96246200 |
| H | 3.68929000  | 2.12623500  | 1.22945500  |
| H | 5.72004100  | 0.69389700  | 1.06460100  |
| H | 1.54777900  | 2.56747500  | 0.17206900  |
| H | 4.46407700  | -2.98653300 | -1.31624200 |
| H | 2.84619100  | -3.25817900 | -0.61888000 |
| H | 3.02502800  | -2.43266300 | -2.20141300 |
| H | 0.19254100  | -0.38499100 | 1.12175700  |
| H | -2.30493800 | 0.32592600  | -1.49418300 |
| H | -5.43901100 | -1.42382800 | 0.57946600  |
| H | -3.95749100 | -1.93984700 | 2.53851900  |
| H | -1.57628200 | -1.20624700 | 2.47207400  |
| H | -4.24476900 | 0.00500200  | -2.49917100 |
| H | -5.44815700 | -1.10540100 | -1.79978000 |
| H | -5.44128500 | 0.62333200  | -1.32816300 |

**Cat-II(syn-anti)-2**

|   |             |             |             |
|---|-------------|-------------|-------------|
| C | -4.41358100 | -1.30981300 | 0.78476400  |
| N | -4.58068600 | -0.30245100 | -0.08987500 |
| C | -3.55544000 | 0.48346200  | -0.46492500 |
| C | -2.27671900 | 0.30434000  | 0.06353200  |
| C | -2.08900500 | -0.73577600 | 0.98884500  |
| C | -3.16159000 | -1.54470800 | 1.33194000  |
| N | -1.29193000 | 1.21574000  | -0.31403100 |
| C | -5.92689500 | -0.02139200 | -0.65189600 |
| C | 0.09075900  | 1.12992200  | -0.23997700 |
| N | 0.56784200  | -0.17164700 | -0.31487500 |
| S | 1.00123200  | 2.48982500  | -0.15000300 |
| C | 1.93057800  | -0.51004800 | -0.35921000 |
| C | 2.83626000  | 0.03823400  | 0.54799200  |
| N | 4.13668900  | -0.29133200 | 0.49111000  |
| C | 4.61162000  | -1.17188900 | -0.41492500 |
| C | 3.74977500  | -1.77180900 | -1.31086800 |
| C | 2.40035300  | -1.43553100 | -1.29100600 |
| C | 5.09222300  | 0.35675600  | 1.42357900  |
| H | -5.28937400 | -1.89634400 | 1.03324500  |
| H | -3.77998500 | 1.26391400  | -1.18467500 |
| H | -1.12074800 | -0.88803200 | 1.45194600  |
| H | -3.04468200 | -2.34709400 | 2.05060700  |
| H | -1.59620100 | 2.16976700  | -0.47751100 |
| H | -6.58218800 | -0.86041400 | -0.42862800 |
| H | -6.31424800 | 0.88939700  | -0.19365000 |
| H | -5.83933100 | 0.09915300  | -1.73118100 |
| H | -0.03750200 | -0.83074800 | -0.79382800 |
| H | 2.54133500  | 0.73933500  | 1.31651300  |
| H | 5.67743100  | -1.36654700 | -0.39056500 |
| H | 4.13934400  | -2.48197400 | -2.03006700 |
| H | 1.72000100  | -1.88014000 | -2.01160900 |
| H | 4.54094300  | 0.76743800  | 2.26695100  |
| H | 5.79956700  | -0.39178700 | 1.77750900  |
| H | 5.61249600  | 1.15422600  | 0.89161800  |

**Cat-II(syn-anti)-3**

|   |             |             |             |
|---|-------------|-------------|-------------|
| C | -4.61702400 | -1.07630000 | -0.22466800 |
| N | -3.49070600 | -1.34636700 | 0.45344900  |
| C | -2.41395500 | -0.53097900 | 0.41453900  |
| C | -2.43398400 | 0.62746100  | -0.35745000 |
| C | -3.61145500 | 0.92378800  | -1.07048200 |
| C | -4.69892700 | 0.07468200  | -0.99687000 |
| N | -1.38503800 | 1.54183600  | -0.40829700 |
| C | -3.44044800 | -2.53850300 | 1.33515400  |
| C | -0.05519300 | 1.43444300  | -0.03068000 |
| N | 0.45562400  | 0.14095600  | -0.17685900 |
| S | 0.79311800  | 2.74320100  | 0.45536800  |
| C | 1.81069100  | -0.13849100 | 0.08978600  |
| C | 2.60806200  | -0.69705400 | -0.89644100 |
| N | 3.90311500  | -0.99013800 | -0.65394000 |
| C | 4.46770100  | -0.72957700 | 0.53799500  |
| C | 3.71819100  | -0.16387600 | 1.55607400  |
| C | 2.37982600  | 0.12937000  | 1.34187100  |
| C | 4.72263100  | -1.62414900 | -1.71627200 |
| H | -5.42981100 | -1.78596200 | -0.12831700 |
| H | -1.56669100 | -0.81850500 | 1.02420000  |
| H | -3.65731400 | 1.82263800  | -1.67869900 |
| H | -5.61285700 | 0.28664100  | -1.53908400 |
| H | -1.66122300 | 2.51075900  | -0.53050400 |
| H | -4.19133500 | -3.25287700 | 1.00362600  |
| H | -2.45255700 | -2.99043800 | 1.26328500  |
| H | -3.64559800 | -2.22704700 | 2.36031300  |
| H | 0.04843200  | -0.38963300 | -0.94152500 |
| H | 2.24412500  | -0.91091300 | -1.89518800 |
| H | 5.51519000  | -0.98755400 | 0.64601700  |
| H | 4.18899400  | 0.03527700  | 2.51127900  |
| H | 1.77602600  | 0.56147500  | 2.13149900  |
| H | 4.26959500  | -1.41939200 | -2.68428900 |
| H | 5.72324900  | -1.19535400 | -1.68753200 |
| H | 4.76423000  | -2.69922900 | -1.53678100 |

**Cat-II(syn-anti)-4**

|   |             |             |             |
|---|-------------|-------------|-------------|
| C | -4.35797900 | -1.43174700 | 0.74946700  |
| N | -4.54040300 | -0.52900800 | -0.22999700 |
| C | -3.54724900 | 0.28007100  | -0.63831400 |
| C | -2.28647000 | 0.23873500  | -0.04082200 |
| C | -2.08394300 | -0.69053900 | 0.99349100  |
| C | -3.12281900 | -1.52744600 | 1.37118600  |
| N | -1.34527700 | 1.16718500  | -0.47812700 |
| C | -5.87313700 | -0.38918300 | -0.87056800 |
| C | 0.02083100  | 1.24572000  | -0.23377200 |
| N | 0.63161300  | 0.00089900  | -0.10944300 |
| S | 0.78261500  | 2.69075200  | -0.18308300 |
| C | 2.01258900  | -0.13106100 | 0.12562900  |
| C | 2.78369900  | -0.91338500 | -0.71953200 |
| N | 4.10427600  | -1.07766900 | -0.49469100 |
| C | 4.71907500  | -0.47123500 | 0.53574000  |
| C | 3.99706500  | 0.32871200  | 1.40600900  |
| C | 2.63453900  | 0.49805800  | 1.21266100  |
| C | 4.89527600  | -1.95584400 | -1.39156200 |
| H | -5.20850300 | -2.04593400 | 1.01765500  |
| H | -3.78433300 | 0.96856600  | -1.44275000 |
| H | -1.13174300 | -0.73832300 | 1.50862800  |
| H | -2.99252400 | -2.24753200 | 2.17017300  |
| H | -1.71162600 | 2.05855100  | -0.79565100 |
| H | -6.47748400 | -1.25705800 | -0.61635100 |
| H | -6.34614400 | 0.52003600  | -0.49746000 |
| H | -5.74147100 | -0.33779200 | -1.95069600 |
| H | 0.19817400  | -0.75486900 | -0.63027500 |
| H | 2.37615100  | -1.41409500 | -1.59057300 |
| H | 5.78352700  | -0.64878900 | 0.63901400  |
| H | 4.50803600  | 0.80634100  | 2.23321800  |
| H | 2.05145100  | 1.10787600  | 1.89281000  |
| H | 4.38576500  | -2.03580500 | -2.34982800 |
| H | 5.87692900  | -1.50896000 | -1.54087300 |
| H | 4.99163300  | -2.93922500 | -0.92959400 |

**Cat-II(syn-syn)-1**

|   |             |             |             |
|---|-------------|-------------|-------------|
| C | 3.59725300  | -1.70255200 | 0.45297400  |
| N | 3.15294300  | -0.96398100 | -0.57668400 |
| C | 2.16451000  | -0.05556400 | -0.43230500 |
| C | 1.55661200  | 0.13736800  | 0.80360400  |
| C | 2.01261400  | -0.62633300 | 1.88978800  |
| C | 3.03572400  | -1.54101100 | 1.71143600  |
| N | 0.56479900  | 1.10758800  | 1.02082300  |
| C | 3.79773300  | -1.08867100 | -1.90767500 |
| C | 0.01147200  | 1.89635300  | -0.00302900 |
| N | -0.57425600 | 1.13044600  | -1.02163600 |
| S | 0.05001700  | 3.51509400  | -0.00665700 |
| C | -1.56368600 | 0.15676500  | -0.80304300 |
| C | -2.19186100 | -0.00931200 | 0.42994000  |
| N | -3.17769400 | -0.91482300 | 0.57846300  |
| C | -3.60377400 | -1.67943300 | -0.44420700 |
| C | -3.02588300 | -1.54429400 | -1.69471500 |
| C | -2.00065500 | -0.62819000 | -1.87758500 |
| C | -3.85158700 | -1.06297500 | 1.89323000  |
| H | 4.39950500  | -2.40088400 | 0.24765700  |
| H | 1.89957500  | 0.51305800  | -1.31506100 |
| H | 1.56537000  | -0.48786000 | 2.86982400  |
| H | 3.40671800  | -2.13610700 | 2.53752500  |
| H | 0.73291000  | 1.66092400  | 1.85714700  |
| H | 4.44053500  | -1.96615800 | -1.90784000 |
| H | 3.02418100  | -1.20126900 | -2.66617700 |
| H | 4.39085300  | -0.19279600 | -2.09558000 |
| H | -0.74208500 | 1.68938600  | -1.85432600 |
| H | -1.93683400 | 0.58130900  | 1.30006000  |
| H | -4.40772200 | -2.37434400 | -0.22935900 |
| H | -3.38323600 | -2.15673300 | -2.51412300 |
| H | -1.54136700 | -0.50726400 | -2.85431400 |
| H | -3.43510700 | -0.34069700 | 2.59149600  |
| H | -4.91690600 | -0.87328400 | 1.76186800  |
| H | -3.68801500 | -2.07632300 | 2.26046800  |

**Cat-II(syn-syn)-2**

|   |             |             |             |
|---|-------------|-------------|-------------|
| C | -3.60451300 | -1.28039000 | 1.01580700  |
| N | -3.56416000 | -1.04223100 | -0.30606300 |
| C | -2.59441300 | -0.29151900 | -0.85953200 |
| C | -1.59234600 | 0.29008900  | -0.08281500 |
| C | -1.62584900 | 0.05616300  | 1.30198000  |
| C | -2.63100000 | -0.73448200 | 1.83706100  |
| N | -0.66041100 | 1.10038800  | -0.74189400 |
| C | -4.60029800 | -1.62502700 | -1.19579800 |
| C | 0.23854800  | 1.98395800  | -0.11164700 |
| N | 1.04910200  | 1.37623100  | 0.85217600  |
| S | 0.31755600  | 3.55975400  | -0.48197600 |
| C | 1.83843100  | 0.23761900  | 0.63120900  |
| C | 2.08241200  | -0.26498800 | -0.64454500 |
| N | 2.89352600  | -1.32671900 | -0.81675000 |
| C | 3.50488100  | -1.93154500 | 0.21873500  |
| C | 3.30964900  | -1.46298200 | 1.50706900  |
| C | 2.47109900  | -0.37936200 | 1.71921300  |
| C | 3.18913200  | -1.80730400 | -2.18976800 |
| H | -4.41966300 | -1.89236300 | 1.38172600  |
| H | -2.65203600 | -0.15255100 | -1.93414600 |
| H | -0.88825800 | 0.50946000  | 1.95216700  |
| H | -2.68336500 | -0.91537700 | 2.90414500  |
| H | -1.02703300 | 1.53121200  | -1.58554000 |
| H | -5.42300000 | -1.98905600 | -0.58421200 |
| H | -4.96304600 | -0.84909400 | -1.86899900 |
| H | -4.15957600 | -2.44837700 | -1.75886900 |
| H | 1.48488300  | 2.06452500  | 1.46048100  |
| H | 1.66244400  | 0.17845600  | -1.53852800 |
| H | 4.14537800  | -2.77304800 | -0.01896000 |
| H | 3.81353400  | -1.95273100 | 2.33188700  |
| H | 2.30938300  | 0.00272000  | 2.72324300  |
| H | 2.45620900  | -1.39274600 | -2.87821600 |
| H | 4.19086300  | -1.47714000 | -2.46779700 |
| H | 3.13159300  | -2.89502400 | -2.20086200 |

**BAr<sup>F</sup><sub>4</sub>-**

|   |             |             |             |
|---|-------------|-------------|-------------|
| C | -0.96845700 | 1.24031500  | -0.47377400 |
| C | -0.77635700 | 1.99867400  | -1.63180800 |
| C | -2.06772200 | 1.60727600  | 0.32566400  |
| C | -1.61381900 | 3.06680100  | -1.96558900 |
| H | 0.04312800  | 1.75877000  | -2.30513000 |
| C | -2.89916100 | 2.67206600  | -0.00067000 |
| H | -2.27376200 | 1.04222100  | 1.23264200  |
| C | -2.68029300 | 3.42030000  | -1.15552100 |
| H | -3.32284600 | 4.25514100  | -1.40993900 |
| C | 0.96888700  | -0.47330100 | -1.24012700 |
| C | 2.06772700  | 0.32675700  | -1.60700800 |
| C | 0.77765500  | -1.63158700 | -1.99832500 |
| C | 2.89955900  | 0.00077900  | -2.67159900 |
| H | 2.27311100  | 1.23394000  | -1.04204000 |
| C | 1.61551800  | -1.96501200 | -3.06624800 |
| H | -0.04144300 | -2.30538700 | -1.75844400 |
| C | 2.68154200  | -1.15432400 | -3.41969300 |
| H | 3.32440500  | -1.40847600 | -4.25437700 |
| C | -0.96842900 | -1.24055100 | 0.47309400  |
| C | -0.77699300 | -1.99874600 | 1.63134500  |
| C | -2.06697200 | -1.60790400 | -0.32715400 |
| C | -1.61439400 | -3.06709200 | 1.96457400  |
| H | 0.04191200  | -1.75853400 | 2.30526500  |
| C | -2.89834600 | -2.67291500 | -0.00136900 |
| H | -2.27248000 | -1.04298500 | -1.23434000 |
| C | -2.68013800 | -3.42098300 | 1.15371200  |
| H | -3.32263600 | -4.25599400 | 1.40771500  |
| C | 0.96794700  | 0.47357200  | 1.24072500  |
| C | 0.77569900  | 1.63162600  | 1.99901300  |
| C | 2.06688800  | -0.32608200 | 1.60819400  |
| C | 1.61272700  | 1.96524100  | 3.06753300  |
| H | -0.04355700 | 2.30509500  | 1.75873500  |
| C | 2.89789400  | 0.00009000  | 2.67336800  |
| H | 2.27301500  | -1.23309800 | 1.04323000  |
| C | 2.67889000  | 1.15497500  | 3.42151300  |
| H | 3.32110600  | 1.40927000  | 4.25665300  |
| B | -0.00001500 | 0.00000800  | -0.00002300 |
| C | 4.08684700  | 0.85693800  | -2.99607700 |
| C | -4.08692000 | 2.99663900  | 0.85479900  |
| C | -4.08534800 | -2.99788400 | -0.85773500 |
| C | 4.08535400  | -0.85557900 | 2.99850300  |
| C | 1.32593100  | -3.21928500 | -3.83478400 |
| F | 2.22822300  | -3.44748100 | -4.80451900 |

|   |             |             |             |
|---|-------------|-------------|-------------|
| F | 0.11865000  | -3.17510000 | -4.42318900 |
| F | 1.32007000  | -4.30208400 | -3.03919800 |
| F | 4.34491500  | 0.87073200  | -4.31709900 |
| F | 5.20615300  | 0.41228900  | -2.39689900 |
| F | 3.91905100  | 2.12901000  | -2.60911900 |
| F | 5.20492100  | -0.41012200 | 2.40041400  |
| F | 3.91854200  | -2.12759700 | 2.61095400  |
| F | 4.34234200  | -0.86971200 | 4.31973400  |
| F | -5.20497300 | -2.39913100 | -0.41331400 |
| F | -3.91747100 | -2.61088800 | -2.12978700 |
| F | -4.34289400 | -4.31900700 | -0.87154700 |
| F | -3.92000900 | 2.60943500  | 2.12691200  |
| F | -4.34471800 | 4.31771600  | 0.86865300  |
| F | -5.20607200 | 2.39778200  | 0.40933900  |
| C | 1.32209900  | 3.21927400  | 3.83606500  |
| C | -1.32332200 | 3.83544700  | -3.21958300 |
| C | -1.32462300 | -3.83557000 | 3.21883900  |
| F | -1.31945500 | -3.04007600 | 4.30171200  |
| F | -0.11698600 | -4.42326200 | 3.17485400  |
| F | -2.22639500 | -4.80585300 | 3.44676100  |
| F | 2.22341600  | 3.44749400  | 4.80670000  |
| F | 0.11427000  | 3.17465200  | 4.42331400  |
| F | 1.31671600  | 4.30224500  | 3.04070600  |
| F | -2.22505400 | 4.80565400  | -3.44798900 |
| F | -1.31736400 | 3.04007100  | -4.30253900 |
| F | -0.11577800 | 4.42326600  | -3.17475200 |



**Cat-II(*syn-anti*)-1•(BAr<sup>F</sup><sub>4</sub>)<sub>2</sub>**

|   |             |             |             |
|---|-------------|-------------|-------------|
| C | -5.30748100 | 4.99778700  | 1.64768200  |
| N | -4.76837400 | 5.49829700  | 0.51524300  |
| C | -3.72023500 | 4.91912500  | -0.09085100 |
| C | -3.13735600 | 3.78517100  | 0.46640900  |
| C | -3.65704100 | 3.27203100  | 1.65313300  |
| C | -4.76389500 | 3.87778700  | 2.23751500  |
| N | -2.10192000 | 3.10228600  | -0.16970700 |
| C | -5.42268400 | 6.66194000  | -0.11284400 |
| C | -0.98633200 | 3.63928900  | -0.75071800 |
| N | -0.19686000 | 2.66328700  | -1.29580600 |
| S | -0.63436400 | 5.26525500  | -0.78490000 |
| C | 1.14881500  | 2.78972000  | -1.66010500 |
| C | 2.02181900  | 3.51429200  | -0.85886600 |
| N | 3.32175800  | 3.60369400  | -1.17107900 |
| C | 3.84174700  | 2.98391300  | -2.24964600 |
| C | 3.01673500  | 2.23300500  | -3.06576100 |
| C | 1.66306300  | 2.11681500  | -2.76869400 |
| C | 4.19756300  | 4.34496400  | -0.24109700 |
| H | -6.17075700 | 5.52042000  | 2.04133700  |
| H | -3.37603500 | 5.35315800  | -1.01860600 |
| H | -3.18533100 | 2.41416200  | 2.12075800  |
| H | -5.20484800 | 3.48042700  | 3.14273600  |
| H | -2.09658300 | 2.10188600  | 0.01150800  |
| H | -5.53538600 | 7.44693500  | 0.63406200  |
| H | -4.80361000 | 7.01582900  | -0.93383800 |
| H | -6.39242000 | 6.34269500  | -0.49414600 |
| H | -0.60789200 | 1.75367700  | -1.48959500 |
| H | 1.70177900  | 4.01120400  | 0.04565100  |
| H | 4.90765600  | 3.10115900  | -2.41578900 |
| H | 3.44142300  | 1.73116100  | -3.92749100 |
| H | 1.01318300  | 1.51413300  | -3.39256300 |
| H | 3.69380900  | 5.26713200  | 0.04657500  |
| H | 4.38536500  | 3.71930800  | 0.63532400  |
| H | 5.13419500  | 4.56646500  | -0.74595900 |
| C | 3.35904000  | -0.13006000 | -0.07518200 |
| C | 2.56500000  | 0.63562200  | 0.79406400  |
| C | 2.65509200  | -0.86933200 | -1.03773500 |
| C | 1.17111200  | 0.59630000  | 0.75796900  |
| H | 3.03877900  | 1.24060500  | 1.56561200  |
| C | 1.26282900  | -0.88851700 | -1.09524600 |
| H | 3.20510300  | -1.48672500 | -1.74435300 |
| C | 0.49591200  | -0.18369500 | -0.17670000 |
| H | -0.58772600 | -0.28054000 | -0.17342000 |

|   |            |             |             |
|---|------------|-------------|-------------|
| C | 5.71182200 | 1.02805300  | 0.63639300  |
| C | 5.56573700 | 1.54504300  | 1.93893500  |
| C | 6.53148200 | 1.78027000  | -0.21728100 |
| C | 6.17350900 | 2.73166300  | 2.34282000  |
| H | 4.98760000 | 0.98715800  | 2.67302100  |
| C | 7.15522900 | 2.96053800  | 0.19080000  |
| H | 6.72538300 | 1.43111300  | -1.22879300 |
| C | 6.98388800 | 3.45875600  | 1.47376000  |
| H | 7.46635200 | 4.37576600  | 1.79304900  |
| C | 5.69050100 | -0.91616600 | -1.18330600 |
| C | 6.65187200 | -1.93291300 | -1.23900200 |
| C | 5.43395100 | -0.26320300 | -2.39213000 |
| C | 7.31676200 | -2.25009000 | -2.42482400 |
| H | 6.90302800 | -2.48710300 | -0.33773200 |
| C | 6.11177000 | -0.55189900 | -3.57038700 |
| H | 4.68613300 | 0.52443000  | -2.40530700 |
| C | 7.06799900 | -1.55817900 | -3.60574700 |
| H | 7.60822800 | -1.79214300 | -4.51546300 |
| C | 5.09165400 | -1.49811800 | 1.36830100  |
| C | 4.10481200 | -2.46805700 | 1.59458400  |
| C | 6.24693700 | -1.59768800 | 2.15645100  |
| C | 4.26367600 | -3.47358800 | 2.54547000  |
| H | 3.18072600 | -2.45708600 | 1.02106800  |
| C | 6.40553000 | -2.59998000 | 3.11133100  |
| H | 7.05367700 | -0.87910700 | 2.02155800  |
| C | 5.41454700 | -3.55178300 | 3.31939700  |
| H | 5.53961900 | -4.33379500 | 4.05857300  |
| B | 4.97035200 | -0.37476700 | 0.18142400  |
| C | 5.85631000 | 3.30493400  | 3.69360900  |
| C | 0.61228400 | -1.72840500 | -2.15663400 |
| C | 5.78051600 | 0.28095200  | -4.76648600 |
| C | 7.66200500 | -2.61382300 | 3.93235500  |
| C | 7.93905900 | 3.72756900  | -0.83085400 |
| F | 8.58077800 | 4.77761900  | -0.31279200 |
| F | 7.09841900 | 4.22186800  | -1.78760500 |
| F | 8.82621100 | 2.97133900  | -1.47706000 |
| F | 6.84517400 | 4.07828500  | 4.15921900  |
| F | 5.60514500 | 2.36038000  | 4.60265200  |
| F | 4.75487700 | 4.08359800  | 3.61965100  |
| F | 7.71605200 | -1.56152300 | 4.76649300  |
| F | 8.75650900 | -2.54307300 | 3.15825100  |
| F | 7.76779900 | -3.71985700 | 4.68147900  |
| F | 4.50914500 | 0.08772200  | -5.17978200 |
| F | 5.85330900 | 1.60429300  | -4.46881300 |

|   |             |             |             |
|---|-------------|-------------|-------------|
| F | 6.57948800  | 0.06098000  | -5.80804600 |
| F | 0.94277000  | -3.01639600 | -2.04963800 |
| F | -0.72638400 | -1.64232000 | -2.11224200 |
| F | 0.99414800  | -1.31996100 | -3.38158100 |
| C | 3.14818400  | -4.46537900 | 2.72238200  |
| C | 0.41276200  | 1.41800300  | 1.75467800  |
| C | 8.29971700  | -3.38788100 | -2.42096600 |
| F | 7.67612400  | -4.57466400 | -2.41882600 |
| F | 9.08459100  | -3.35749900 | -1.33542400 |
| F | 9.09821500  | -3.36196600 | -3.49954500 |
| F | 3.48336500  | -5.45938000 | 3.55817500  |
| F | 2.79589400  | -5.02014300 | 1.55399000  |
| F | 2.04456100  | -3.88207300 | 3.21946900  |
| F | -0.92716100 | 1.23070400  | 1.63714100  |
| F | 0.60469600  | 2.74909800  | 1.57169200  |
| F | 0.75160200  | 1.16044600  | 3.00944900  |
| C | -6.03720500 | -1.58216500 | -0.24275700 |
| C | -6.81785200 | -1.27461800 | -1.35885000 |
| C | -6.54158200 | -2.58115900 | 0.61014400  |
| C | -8.03711600 | -1.91225100 | -1.60668300 |
| H | -6.48160100 | -0.52623900 | -2.07334500 |
| C | -7.75217800 | -3.21508300 | 0.36725500  |
| H | -5.97053300 | -2.86642100 | 1.49154500  |
| C | -8.52080100 | -2.88470900 | -0.74854800 |
| H | -9.47043700 | -3.37239300 | -0.93558000 |
| C | -4.30054100 | 0.35191900  | -0.91527200 |
| C | -5.19648100 | 1.43630500  | -0.94181000 |
| C | -3.25479200 | 0.40397800  | -1.85192400 |
| C | -5.08192100 | 2.47489900  | -1.86330100 |
| H | -6.02638000 | 1.45271100  | -0.23702400 |
| C | -3.12865000 | 1.45666000  | -2.76319000 |
| H | -2.53984600 | -0.41237000 | -1.89685700 |
| C | -4.04131800 | 2.50305400  | -2.78792900 |
| H | -3.94586900 | 3.31173100  | -3.50542700 |
| C | -3.46028900 | -2.10839900 | -0.16814800 |
| C | -2.45218900 | -2.56726700 | 0.68902800  |
| C | -3.51998700 | -2.74675800 | -1.42374700 |
| C | -1.54422500 | -3.56090300 | 0.30719100  |
| H | -2.35275800 | -2.18446100 | 1.69784500  |
| C | -2.63908300 | -3.75242300 | -1.79326200 |
| H | -4.28894900 | -2.45054000 | -2.13435600 |
| C | -1.63223300 | -4.17494400 | -0.92968300 |
| H | -0.92611300 | -4.94368200 | -1.22521000 |
| C | -4.62096500 | -0.29746200 | 1.62439600  |

|   |             |             |             |
|---|-------------|-------------|-------------|
| C | -5.82876900 | 0.13918900  | 2.20125600  |
| C | -3.47219200 | -0.07066700 | 2.39353200  |
| C | -5.87748100 | 0.73344500  | 3.45956800  |
| H | -6.76224600 | -0.00627700 | 1.66349400  |
| C | -3.52037900 | 0.48723100  | 3.67156600  |
| H | -2.49950600 | -0.33063000 | 1.99710600  |
| C | -4.72564800 | 0.89704900  | 4.22492800  |
| H | -4.77043100 | 1.31565600  | 5.22549500  |
| B | -4.57372500 | -0.92327700 | 0.10466900  |
| C | -6.12105500 | 3.55481900  | -1.90760500 |
| C | -8.22303000 | -4.30677800 | 1.28518600  |
| C | -2.65173000 | -4.30427700 | -3.18757900 |
| C | -2.24145900 | 0.74483200  | 4.41401800  |
| C | -2.02865700 | 1.44842000  | -3.78297600 |
| F | -1.51775400 | 2.68024600  | -3.97222300 |
| F | -2.41685700 | 0.99473900  | -4.97079100 |
| F | -0.99549000 | 0.66847400  | -3.37518900 |
| F | -5.59212800 | 4.73507400  | -2.32061500 |
| F | -6.65262400 | 3.79667500  | -0.68893700 |
| F | -7.13019300 | 3.27820300  | -2.72753100 |
| F | -1.74763100 | 1.96688600  | 4.09809500  |
| F | -1.29595600 | -0.14714900 | 4.11238400  |
| F | -2.41845400 | 0.73798000  | 5.73951900  |
| F | -2.41818200 | -5.62428400 | -3.20670200 |
| F | -3.81367100 | -4.08550300 | -3.81635600 |
| F | -1.68643900 | -3.72972900 | -3.93094700 |
| F | -7.81368100 | -4.10798000 | 2.54684800  |
| F | -9.56271400 | -4.39263100 | 1.30392300  |
| F | -7.76028800 | -5.50817700 | 0.90850900  |
| C | -7.16837900 | 1.27953900  | 3.99564500  |
| C | -8.82902200 | -1.48874500 | -2.80857200 |
| C | -0.37795800 | -3.88184200 | 1.19963200  |
| F | -0.65298100 | -3.66202500 | 2.49063200  |
| F | 0.67742000  | -3.09658900 | 0.88301100  |
| F | 0.02702500  | -5.14803600 | 1.07053200  |
| F | -7.28193400 | 1.10120200  | 5.31561200  |
| F | -8.24072300 | 0.75003500  | 3.40725800  |
| F | -7.23564900 | 2.62303300  | 3.78971300  |
| F | -9.90483300 | -2.26017100 | -3.00973500 |
| F | -8.08764800 | -1.52631400 | -3.92691400 |
| F | -9.26489700 | -0.22146800 | -2.68518300 |

**Cat-II(*syn-anti*)-2•(BAR<sup>F</sup><sub>4</sub>)<sub>2</sub>**

|   |             |             |             |
|---|-------------|-------------|-------------|
| C | -5.48872700 | 3.76141200  | 2.34231900  |
| N | -4.97339700 | 4.81786300  | 1.68946400  |
| C | -3.72259700 | 4.82505900  | 1.18665200  |
| C | -2.89166200 | 3.71888500  | 1.37072300  |
| C | -3.40994000 | 2.62466900  | 2.07602100  |
| C | -4.71153600 | 2.64133200  | 2.54898800  |
| N | -1.58257500 | 3.58581300  | 0.90697900  |
| C | -5.81537400 | 6.02182500  | 1.53689800  |
| C | -0.77241800 | 4.44151800  | 0.20479600  |
| N | 0.47595500  | 3.88839900  | 0.03530400  |
| S | -1.23162100 | 5.93568800  | -0.35387000 |
| C | 1.42499000  | 4.16504400  | -0.94981700 |
| C | 2.21813100  | 3.09067200  | -1.35652200 |
| N | 3.17331000  | 3.24892400  | -2.28546300 |
| C | 3.39382100  | 4.43751700  | -2.87421900 |
| C | 2.63421300  | 5.53129800  | -2.51350700 |
| C | 1.65726600  | 5.41559500  | -1.53375100 |
| C | 3.97088200  | 2.06751200  | -2.68492100 |
| H | -6.51561700 | 3.84328800  | 2.67682900  |
| H | -3.41514400 | 5.70677400  | 0.64793000  |
| H | -2.78606000 | 1.75840000  | 2.26206900  |
| H | -5.13068000 | 1.79014200  | 3.07194100  |
| H | -1.20729500 | 2.66017200  | 1.09255000  |
| H | -5.88446000 | 6.52390200  | 2.50247600  |
| H | -5.36342800 | 6.67887200  | 0.79834600  |
| H | -6.79894100 | 5.71204500  | 1.18808600  |
| H | 0.66512900  | 3.03509000  | 0.55397700  |
| H | 2.09309500  | 2.08328300  | -0.96353400 |
| H | 4.18119100  | 4.47116700  | -3.61593800 |
| H | 2.83092000  | 6.48783800  | -2.98098100 |
| H | 1.08647800  | 6.27659000  | -1.22061400 |
| H | 4.32533600  | 1.57456800  | -1.77902500 |
| H | 3.33104700  | 1.39382300  | -3.25582600 |
| H | 4.81540200  | 2.39276600  | -3.28819200 |
| C | 3.36269500  | -0.45751100 | 0.01737200  |
| C | 2.53311500  | -0.10868300 | 1.09738100  |
| C | 2.72235300  | -0.62930100 | -1.21585300 |
| C | 1.16591500  | 0.08242400  | 0.94078100  |
| H | 2.97511600  | 0.01415400  | 2.08510600  |
| C | 1.34612000  | -0.44130300 | -1.37256500 |
| H | 3.30980100  | -0.92040300 | -2.08557500 |
| C | 0.54704200  | -0.08916000 | -0.29528000 |
| H | -0.52305200 | 0.02936100  | -0.40736900 |

|   |            |             |             |
|---|------------|-------------|-------------|
| C | 5.60004500 | 0.88711100  | 0.59844100  |
| C | 4.82328100 | 2.03619000  | 0.78879000  |
| C | 6.99180200 | 1.08631600  | 0.66059400  |
| C | 5.38139600 | 3.29231100  | 1.02286800  |
| H | 3.73994700 | 1.96530700  | 0.77063600  |
| C | 7.55458400 | 2.33173500  | 0.92281200  |
| H | 7.65803100 | 0.24309500  | 0.48965600  |
| C | 6.75646400 | 3.45785400  | 1.10372900  |
| H | 7.19876100 | 4.42781800  | 1.30446600  |
| C | 5.66753200 | -1.20073100 | -1.08959600 |
| C | 5.58799500 | -2.56571300 | -1.41232900 |
| C | 6.22400300 | -0.37590500 | -2.07344500 |
| C | 6.01294700 | -3.05915600 | -2.64219400 |
| H | 5.17267000 | -3.26488000 | -0.69027300 |
| C | 6.62819300 | -0.86278600 | -3.31680700 |
| H | 6.36069900 | 0.68558200  | -1.87579800 |
| C | 6.52741800 | -2.21161000 | -3.62033900 |
| H | 6.83629800 | -2.59567400 | -4.58543300 |
| C | 5.16469100 | -1.62585800 | 1.54555000  |
| C | 4.24614600 | -2.67114900 | 1.72570500  |
| C | 6.18800800 | -1.54174200 | 2.49745900  |
| C | 4.33387400 | -3.56835200 | 2.78513100  |
| H | 3.41645600 | -2.78587100 | 1.03337000  |
| C | 6.28600900 | -2.44608900 | 3.55409300  |
| H | 6.93386500 | -0.75356400 | 2.43503800  |
| C | 5.35889600 | -3.46909100 | 3.71653100  |
| H | 5.43300100 | -4.16519500 | 4.54376500  |
| B | 4.98161000 | -0.60333000 | 0.27601800  |
| C | 4.48199000 | 4.48614600  | 1.08395200  |
| C | 0.75748700 | -0.52917600 | -2.75023100 |
| C | 7.12203700 | 0.12551200  | -4.32800400 |
| C | 7.37758700 | -2.25471900 | 4.56675000  |
| C | 9.05034600 | 2.48715300  | 0.93326300  |
| F | 9.43724400 | 3.48186800  | 1.74611700  |
| F | 9.51644700 | 2.78030500  | -0.29156900 |
| F | 9.66358100 | 1.36839100  | 1.33289300  |
| F | 4.94228900 | 5.45129500  | 1.88049700  |
| F | 3.23547000 | 4.17348700  | 1.49267700  |
| F | 4.32940800 | 5.04207100  | -0.14596900 |
| F | 7.08991900 | -1.25532400 | 5.41857800  |
| F | 8.54377300 | -1.93684500 | 3.98437100  |
| F | 7.57996300 | -3.35480100 | 5.30579400  |
| F | 6.13172700 | 0.98639500  | -4.68353200 |
| F | 8.11262200 | 0.88927300  | -3.84816900 |

|   |             |             |             |
|---|-------------|-------------|-------------|
| F | 7.55455600  | -0.45005900 | -5.45214100 |
| F | 1.07784100  | -1.66576000 | -3.37154100 |
| F | -0.57510300 | -0.42244000 | -2.74624700 |
| F | 1.22299800  | 0.48464900  | -3.52220500 |
| C | 3.24744200  | -4.59505600 | 2.92855900  |
| C | 0.36882200  | 0.58379300  | 2.09790100  |
| C | 5.95376700  | -4.53839900 | -2.90512200 |
| F | 4.87290800  | -5.09837600 | -2.34584500 |
| F | 7.02688900  | -5.16890800 | -2.40565600 |
| F | 5.91612900  | -4.80608600 | -4.21971100 |
| F | 3.53090700  | -5.50499600 | 3.87073500  |
| F | 3.02692700  | -5.25038800 | 1.78019200  |
| F | 2.08100500  | -4.01798900 | 3.26962000  |
| F | -0.96450200 | 0.51383600  | 1.85858700  |
| F | 0.59744800  | 1.92689600  | 2.28250800  |
| F | 0.62288300  | -0.00366800 | 3.24824500  |
| C | -5.86256500 | -1.65660900 | -0.76987200 |
| C | -6.47743100 | -1.13480600 | -1.90938200 |
| C | -6.39626100 | -2.86112400 | -0.27216800 |
| C | -7.57282200 | -1.76071400 | -2.51212000 |
| H | -6.10244000 | -0.21908200 | -2.36096100 |
| C | -7.48485700 | -3.48291300 | -0.86702100 |
| H | -5.94640100 | -3.32176300 | 0.60468000  |
| C | -8.09241100 | -2.93503600 | -1.99729700 |
| H | -8.94584600 | -3.41720400 | -2.46131200 |
| C | -4.27152600 | 0.51361900  | -0.64557900 |
| C | -5.27465400 | 1.50099900  | -0.57660500 |
| C | -3.08633900 | 0.90023000  | -1.28025300 |
| C | -5.10565200 | 2.76649400  | -1.12932400 |
| H | -6.22178700 | 1.26067900  | -0.09453500 |
| C | -2.90604100 | 2.17776200  | -1.82262500 |
| H | -2.29537700 | 0.16814700  | -1.40723600 |
| C | -3.91306900 | 3.12688000  | -1.76165700 |
| H | -3.78326400 | 4.11205000  | -2.19672400 |
| C | -3.24540300 | -1.95871000 | -0.40885800 |
| C | -2.24028600 | -2.38833000 | 0.47106100  |
| C | -3.03725400 | -2.29423600 | -1.75824400 |
| C | -1.06461700 | -2.99312300 | 0.02802700  |
| H | -2.33708200 | -2.25138800 | 1.54032900  |
| C | -1.89077700 | -2.95181700 | -2.19903500 |
| H | -3.78914800 | -2.01772200 | -2.49656500 |
| C | -0.86876400 | -3.27994900 | -1.31634400 |
| H | 0.05083000  | -3.73283900 | -1.66920500 |
| C | -4.82517700 | -0.79773600 | 1.56025300  |

|   |             |             |             |
|---|-------------|-------------|-------------|
| C | -6.10792900 | -0.71538100 | 2.12885600  |
| C | -3.76926200 | -0.56945000 | 2.45040300  |
| C | -6.29763300 | -0.46182400 | 3.48838800  |
| H | -6.98424200 | -0.85095800 | 1.49901400  |
| C | -3.94618100 | -0.38351900 | 3.81837200  |
| H | -2.75867500 | -0.53306600 | 2.07091900  |
| C | -5.22175700 | -0.33034400 | 4.36484100  |
| H | -5.37847900 | -0.17279100 | 5.42632400  |
| B | -4.54748800 | -1.00638700 | -0.04616400 |
| C | -6.23843200 | 3.74708500  | -1.14027100 |
| C | -8.00966500 | -4.78841700 | -0.34230000 |
| C | -1.74815400 | -3.24461800 | -3.66662500 |
| C | -2.71759500 | -0.16208600 | 4.65036400  |
| C | -1.62149700 | 2.48569200  | -2.53536000 |
| F | -0.55166000 | 2.08037000  | -1.79859700 |
| F | -1.44856900 | 3.80132700  | -2.74450100 |
| F | -1.52349200 | 1.87828100  | -3.71467500 |
| F | -5.78322200 | 5.02423100  | -1.12505400 |
| F | -7.03662200 | 3.62127500  | -0.05561800 |
| F | -7.01967800 | 3.62999200  | -2.21067600 |
| F | -2.18584800 | 1.06363500  | 4.40069300  |
| F | -1.75727600 | -1.04634600 | 4.36389600  |
| F | -2.96594600 | -0.21664000 | 5.96090800  |
| F | -0.60107300 | -3.87800600 | -3.94710700 |
| F | -2.75372500 | -4.01129000 | -4.11182800 |
| F | -1.77140100 | -2.11820600 | -4.39935700 |
| F | -7.56686700 | -5.05412200 | 0.89375100  |
| F | -9.35257300 | -4.79410600 | -0.30034400 |
| F | -7.64582000 | -5.81522100 | -1.12604100 |
| C | -7.67595800 | -0.16651400 | 4.00079700  |
| C | -8.20192700 | -1.10458700 | -3.70563800 |
| C | 0.01776600  | -3.29992300 | 1.02651800  |
| F | 0.01253500  | -2.40824800 | 2.04007900  |
| F | 1.23524000  | -3.23858800 | 0.45375100  |
| F | -0.10359100 | -4.51175500 | 1.57105200  |
| F | -7.82439600 | -0.49797800 | 5.28852600  |
| F | -8.63156400 | -0.77947900 | 3.30029100  |
| F | -7.91833400 | 1.16538200  | 3.91417400  |
| F | -9.11024500 | -1.88956100 | -4.29976000 |
| F | -7.28550000 | -0.77502700 | -4.62890700 |
| F | -8.82614000 | 0.03744800  | -3.36498100 |



**Cat-II(*syn-anti*)-3•(BAr<sup>F</sup><sub>4</sub>)<sub>2</sub>**

|   |             |             |             |
|---|-------------|-------------|-------------|
| C | 5.49342100  | -5.18745700 | 0.62905000  |
| N | 5.15333700  | -4.03216600 | 1.22289900  |
| C | 3.92142800  | -3.51457000 | 1.09729500  |
| C | 2.94669800  | -4.15288900 | 0.33835500  |
| C | 3.27848600  | -5.36002900 | -0.29275600 |
| C | 4.55833300  | -5.86865400 | -0.13070300 |
| N | 1.74759100  | -3.47962200 | 0.18746100  |
| C | 6.12910600  | -3.27355100 | 2.03442200  |
| C | 0.51012000  | -3.97618500 | -0.15617800 |
| N | -0.28506700 | -2.94798900 | -0.58808100 |
| S | 0.04175300  | -5.55774100 | -0.05921600 |
| C | -1.63470000 | -3.06323800 | -0.94102400 |
| C | -2.02472100 | -2.58987900 | -2.18164300 |
| N | -3.31972900 | -2.63662700 | -2.55398200 |
| C | -4.26135000 | -3.15804200 | -1.74828700 |
| C | -3.91313300 | -3.65098300 | -0.50191500 |
| C | -2.59780200 | -3.58606800 | -0.07265900 |
| C | -3.69256400 | -2.08046400 | -3.87029100 |
| H | 6.51460600  | -5.51992500 | 0.75919700  |
| H | 3.74426500  | -2.57355000 | 1.60676900  |
| H | 2.54977700  | -5.86588700 | -0.91180500 |
| H | 4.85343800  | -6.78721300 | -0.62216100 |
| H | 1.77707700  | -2.49170400 | 0.41757300  |
| H | 6.16788900  | -2.24929500 | 1.65646100  |
| H | 5.78582100  | -3.27289500 | 3.06916100  |
| H | 7.10702800  | -3.73977100 | 1.94663200  |
| H | 0.18014800  | -2.11124400 | -0.92661500 |
| H | -1.32588900 | -2.15980000 | -2.88978000 |
| H | -5.28270900 | -3.16340900 | -2.11572500 |
| H | -4.69074400 | -4.05028300 | 0.13634300  |
| H | -2.31936200 | -3.91484300 | 0.92259100  |
| H | -3.66015200 | -0.99221000 | -3.81547200 |
| H | -2.97830600 | -2.43226200 | -4.61375600 |
| H | -4.69766100 | -2.41024000 | -4.12015700 |
| C | -3.36202200 | 0.30644600  | -0.25055200 |
| C | -2.37386700 | -0.06872100 | 0.67965000  |
| C | -2.87921900 | 0.65273400  | -1.52241600 |
| C | -1.01750900 | -0.05100000 | 0.37879100  |
| H | -2.65942900 | -0.34022200 | 1.69080000  |
| C | -1.51571100 | 0.64149100  | -1.83720100 |
| H | -3.57446200 | 0.98485500  | -2.29033600 |
| C | -0.56169600 | 0.32103400  | -0.88302500 |
| H | 0.49903800  | 0.39515400  | -1.10554000 |

|   |             |             |             |
|---|-------------|-------------|-------------|
| C | -5.53285800 | -0.97718400 | 0.78473300  |
| C | -5.02259200 | -1.56293000 | 1.95882400  |
| C | -6.55816800 | -1.70210000 | 0.16202000  |
| C | -5.45497200 | -2.79830600 | 2.43197500  |
| H | -4.28445500 | -1.03172900 | 2.55250900  |
| C | -7.00539200 | -2.93512200 | 0.64032000  |
| H | -7.04442600 | -1.30889200 | -0.72580900 |
| C | -6.46008200 | -3.50818500 | 1.77984800  |
| H | -6.80082100 | -4.46963200 | 2.14780100  |
| C | -5.85417500 | 0.97842200  | -1.03080900 |
| C | -6.63163100 | 2.14405000  | -1.02976900 |
| C | -5.93823300 | 0.19799400  | -2.19064300 |
| C | -7.44419700 | 2.48779300  | -2.11050700 |
| H | -6.62057300 | 2.79399700  | -0.15887300 |
| C | -6.76414300 | 0.51974800  | -3.26271600 |
| H | -5.36256100 | -0.72595800 | -2.23835400 |
| C | -7.53064700 | 1.67776300  | -3.23723600 |
| H | -8.18780500 | 1.93425400  | -4.06014000 |
| C | -4.98930100 | 1.55697700  | 1.44859700  |
| C | -4.07791700 | 2.61872000  | 1.54857100  |
| C | -6.00667400 | 1.51887800  | 2.41006500  |
| C | -4.16973600 | 3.57169700  | 2.55948900  |
| H | -3.27600300 | 2.71650200  | 0.82208500  |
| C | -6.10261300 | 2.47373500  | 3.42078600  |
| H | -6.75465600 | 0.72950300  | 2.37268300  |
| C | -5.18283500 | 3.50941600  | 3.51068500  |
| H | -5.26102600 | 4.25782300  | 4.29112800  |
| B | -4.94366100 | 0.46877100  | 0.22785000  |
| C | -4.72786800 | -3.44180500 | 3.57512000  |
| C | -1.08186200 | 0.89560400  | -3.25155900 |
| C | -6.80338100 | -0.40860500 | -4.43445600 |
| C | -7.19385000 | 2.33522900  | 4.44237200  |
| C | -7.97703300 | -3.70657000 | -0.19942500 |
| F | -8.54039200 | -4.72167400 | 0.46141200  |
| F | -7.32827900 | -4.24709000 | -1.26585100 |
| F | -8.94960500 | -2.94103400 | -0.69857300 |
| F | -5.47941700 | -4.34299600 | 4.21617900  |
| F | -4.28614400 | -2.55480400 | 4.46951800  |
| F | -3.63840200 | -4.10455100 | 3.11356600  |
| F | -6.92849600 | 1.34673900  | 5.31302900  |
| F | -8.37013300 | 2.03541400  | 3.87037700  |
| F | -7.36463600 | 3.45605200  | 5.15707500  |
| F | -5.68761500 | -0.32067200 | -5.19089300 |
| F | -6.86105700 | -1.70294300 | -4.02889300 |

|   |             |             |             |
|---|-------------|-------------|-------------|
| F | -7.84257500 | -0.19644100 | -5.23906400 |
| F | -1.70462300 | 1.92979200  | -3.80794300 |
| F | 0.23762500  | 1.07150200  | -3.35939700 |
| F | -1.37938500 | -0.18861200 | -4.02912400 |
| C | -3.13574000 | 4.65768200  | 2.65735100  |
| C | -0.03346100 | -0.46720700 | 1.42850300  |
| C | -8.21717100 | 3.77734700  | -2.07499200 |
| F | -7.46805700 | 4.80836000  | -2.49382900 |
| F | -8.63591700 | 4.07114000  | -0.83844700 |
| F | -9.29662200 | 3.72769000  | -2.87102400 |
| F | -3.64412600 | 5.77506300  | 3.20126600  |
| F | -2.63923800 | 4.98087700  | 1.45618200  |
| F | -2.09972900 | 4.29021100  | 3.43082600  |
| F | 1.17944200  | -0.74738900 | 0.84111900  |
| F | -0.40628000 | -1.59267800 | 2.05383100  |
| F | 0.20959100  | 0.44448200  | 2.35933300  |
| C | 5.81758200  | 1.79706800  | -0.57900000 |
| C | 6.52109300  | 1.55981400  | -1.76077000 |
| C | 6.17184700  | 2.95920400  | 0.13199200  |
| C | 7.53584800  | 2.41513800  | -2.20115900 |
| H | 6.28871500  | 0.68981500  | -2.37120800 |
| C | 7.18165300  | 3.80705100  | -0.29982400 |
| H | 5.64583200  | 3.20140800  | 1.05331800  |
| C | 7.88264400  | 3.54189500  | -1.47631400 |
| H | 8.67962500  | 4.19643700  | -1.81025800 |
| C | 4.49599600  | -0.53304400 | -0.87104000 |
| C | 5.61126800  | -1.38458000 | -0.94743300 |
| C | 3.36092200  | -0.95307800 | -1.58072100 |
| C | 5.60228600  | -2.56468800 | -1.69013600 |
| H | 6.52819900  | -1.09822800 | -0.43194300 |
| C | 3.34662200  | -2.13229600 | -2.32515100 |
| H | 2.47779700  | -0.32142600 | -1.58731500 |
| C | 4.46700800  | -2.95480000 | -2.39325000 |
| H | 4.46013700  | -3.86822300 | -2.97970000 |
| C | 3.22148800  | 1.75533400  | -0.17151800 |
| C | 2.34865700  | 2.14535100  | 0.85466900  |
| C | 2.91484000  | 2.23824700  | -1.45611300 |
| C | 1.23036300  | 2.94199400  | 0.60554500  |
| H | 2.53637000  | 1.84918200  | 1.88217700  |
| C | 1.80892300  | 3.04515100  | -1.70491900 |
| H | 3.57453600  | 1.99576100  | -2.28742000 |
| C | 0.94571200  | 3.39976500  | -0.67492900 |
| H | 0.07919500  | 4.02679500  | -0.86278500 |
| C | 4.92372900  | 0.38914400  | 1.53224400  |

|   |             |             |             |
|---|-------------|-------------|-------------|
| C | 6.21305500  | 0.40548500  | 2.08790300  |
| C | 3.93418300  | -0.22277600 | 2.31889200  |
| C | 6.48200000  | -0.13879300 | 3.34530400  |
| H | 7.03484200  | 0.84496100  | 1.52794900  |
| C | 4.19636300  | -0.75220800 | 3.57939900  |
| H | 2.92259300  | -0.28772600 | 1.93464500  |
| C | 5.47746800  | -0.70720000 | 4.11848100  |
| H | 5.69132200  | -1.12131500 | 5.09902200  |
| B | 4.59560000  | 0.86977400  | -0.00553700 |
| C | 6.85712300  | -3.38390600 | -1.78069400 |
| C | 7.50311500  | 5.05557300  | 0.47139800  |
| C | 1.58391100  | 3.62391100  | -3.07325800 |
| C | 3.13074400  | -1.53194000 | 4.28940500  |
| C | 2.12777000  | -2.54259600 | -3.09631700 |
| F | 1.72214900  | -3.78689400 | -2.76123800 |
| F | 2.32422500  | -2.54674200 | -4.41269400 |
| F | 1.07184100  | -1.72301200 | -2.85379000 |
| F | 6.60059700  | -4.66172100 | -2.12114800 |
| F | 7.50113600  | -3.42519000 | -0.59005000 |
| F | 7.72220100  | -2.90082800 | -2.66909200 |
| F | 3.26602900  | -2.85661600 | 3.99872700  |
| F | 1.89707000  | -1.18879000 | 3.90291000  |
| F | 3.20414600  | -1.42573100 | 5.61546200  |
| F | 2.12041900  | 4.84753500  | -3.18178600 |
| F | 2.12825200  | 2.86677100  | -4.03593900 |
| F | 0.27365000  | 3.74909400  | -3.34522600 |
| F | 7.14869500  | 4.95094700  | 1.75982400  |
| F | 8.81663600  | 5.33241400  | 0.43337300  |
| F | 6.86683000  | 6.12518900  | -0.02844500 |
| C | 7.90271600  | -0.28653500 | 3.80509700  |
| C | 8.24384800  | 2.07602300  | -3.47993800 |
| C | 0.28029100  | 3.32850900  | 1.70518000  |
| F | 0.72595600  | 2.98131800  | 2.91719300  |
| F | -0.91811200 | 2.72783400  | 1.52904300  |
| F | 0.05528800  | 4.64640200  | 1.71250500  |
| F | 8.01442200  | -0.23960900 | 5.13720100  |
| F | 8.71354700  | 0.63462000  | 3.28449700  |
| F | 8.37693700  | -1.49652800 | 3.41942700  |
| F | 9.23438600  | 2.93340900  | -3.75854600 |
| F | 7.40121200  | 2.08005500  | -4.52518200 |
| F | 8.78046100  | 0.84429900  | -3.42996600 |

**COM-I**

|   |             |             |             |
|---|-------------|-------------|-------------|
| C | -4.94661900 | 0.99380700  | -0.38461200 |
| C | -4.49443700 | -0.31901000 | -0.40528800 |
| C | -3.14454600 | -0.61229000 | -0.56249200 |
| C | -2.22731000 | 0.42611100  | -0.71524500 |
| C | -2.66744700 | 1.75125300  | -0.71222900 |
| C | -4.01805800 | 2.01832100  | -0.53594100 |
| N | -0.87716300 | 0.09909500  | -0.95696600 |
| C | 0.22828200  | 0.73081400  | -0.44123400 |
| N | 1.36781500  | 0.29550800  | -1.06524800 |
| S | 0.17584400  | 1.83682500  | 0.80133000  |
| C | 2.70688200  | 0.41304900  | -0.64927600 |
| C | 3.24986600  | 1.55354200  | -0.04981700 |
| C | 4.59382200  | 1.55436400  | 0.30580700  |
| C | 5.42086600  | 0.45984900  | 0.07522900  |
| C | 4.87250800  | -0.65430000 | -0.54442800 |
| C | 3.53308700  | -0.68313900 | -0.90960800 |
| O | 0.87508900  | -2.53268100 | -1.01503300 |
| C | 0.74174600  | -2.40890000 | 0.41165200  |
| C | 1.54895400  | -3.48114300 | -0.18771400 |
| C | -4.49239100 | 3.44463300  | -0.47925800 |
| F | -3.65337200 | 4.27381400  | -1.11182500 |
| F | -4.60090200 | 3.87311200  | 0.78550600  |
| F | -5.70243900 | 3.57665300  | -1.04270200 |
| C | -5.48875400 | -1.42709800 | -0.20141300 |
| F | -6.62988200 | -1.18782200 | -0.86184200 |
| F | -5.81493000 | -1.56289300 | 1.09526700  |
| F | -5.01814600 | -2.61115300 | -0.61710600 |
| C | 5.69674400  | -1.87899900 | -0.82155900 |
| F | 6.95817000  | -1.74567500 | -0.40469000 |
| F | 5.72369200  | -2.16579100 | -2.13022800 |
| F | 5.17739700  | -2.95930900 | -0.20497800 |
| C | 5.17361900  | 2.81077200  | 0.89974300  |
| F | 4.29937900  | 3.42285800  | 1.70564800  |
| F | 5.50970500  | 3.68716600  | -0.05755700 |
| F | 6.28085000  | 2.55459400  | 1.60995800  |
| C | -0.62426300 | -2.62827100 | 0.96113000  |
| C | -1.11101900 | -1.76456800 | 1.94198300  |
| C | -2.39339300 | -1.94301000 | 2.45725300  |
| C | -3.19346800 | -2.98282200 | 1.99445800  |
| C | -2.71517100 | -3.83904300 | 1.00185200  |
| C | -1.43825200 | -3.65994500 | 0.48225800  |
| H | -6.00226400 | 1.21544400  | -0.27092700 |
| H | -2.80725700 | -1.64488900 | -0.56164900 |

|   |             |             |             |
|---|-------------|-------------|-------------|
| H | -1.96483200 | 2.56228800  | -0.85308900 |
| H | -0.72692000 | -0.81156100 | -1.38045300 |
| H | 1.23363500  | -0.48892000 | -1.69509100 |
| H | 2.63172300  | 2.41879700  | 0.14450300  |
| H | 6.46268300  | 0.47684600  | 0.37106400  |
| H | 3.11715100  | -1.56280300 | -1.39472900 |
| H | 1.28112600  | -1.55665600 | 0.82979000  |
| H | 2.63398100  | -3.39797600 | -0.17545000 |
| H | 1.14618400  | -4.49016400 | -0.22751000 |
| H | -0.49382800 | -0.93767200 | 2.28530700  |
| H | -2.77034600 | -1.25824600 | 3.20950600  |
| H | -4.19627900 | -3.11374500 | 2.38530500  |
| H | -3.34758200 | -4.63485400 | 0.62259100  |
| H | -1.07914300 | -4.30971600 | -0.31126300 |

**COM-II**

|   |             |             |             |
|---|-------------|-------------|-------------|
| C | -3.98010500 | 1.14664600  | 0.37106300  |
| C | -2.73077700 | 1.71634900  | 0.14354600  |
| C | -1.56854500 | 1.00399800  | 0.37336000  |
| C | -1.62377700 | -0.32323200 | 0.82142400  |
| C | -2.86780200 | -0.90147800 | 1.07976600  |
| C | -4.02165900 | -0.15554300 | 0.84452600  |
| N | -0.37234000 | -0.95204600 | 0.95379100  |
| C | -0.04877700 | -2.26558000 | 1.09049300  |
| N | 1.29976000  | -2.51733800 | 1.00378100  |
| S | -1.08241800 | -3.55971300 | 1.30808000  |
| C | 2.34354000  | -1.57140300 | 0.86102700  |
| C | 2.51909300  | -0.56802500 | 1.81642400  |
| C | 3.51248900  | 0.38483700  | 1.63512600  |
| C | 4.34358100  | 0.34949000  | 0.52129000  |
| C | 4.17455300  | -0.66864700 | -0.40820800 |
| C | 3.18635000  | -1.63248700 | -0.24666700 |
| O | 1.45110900  | 0.75965900  | -0.85897600 |
| C | 1.13716400  | 0.34332800  | -2.20164000 |
| C | 1.38451200  | 1.75410100  | -1.87664400 |
| C | -5.34998700 | -0.83942900 | 1.01079500  |
| F | -5.35024400 | -1.68784500 | 2.04494500  |
| F | -5.66077500 | -1.55382200 | -0.08529200 |
| F | -6.34340800 | 0.03983000  | 1.20060700  |
| C | -2.65699500 | 3.07638900  | -0.48536200 |
| F | -3.05909800 | 3.03463800  | -1.77056000 |
| F | -1.40650800 | 3.56841700  | -0.48843800 |
| F | -3.44278000 | 3.96232100  | 0.13546100  |
| C | 4.97495900  | -0.64187700 | -1.67809100 |
| F | 6.20354200  | -0.15301100 | -1.48572300 |
| F | 4.37687600  | 0.14621000  | -2.59544900 |
| F | 5.08873800  | -1.85776500 | -2.22378300 |
| C | 3.73729600  | 1.44302600  | 2.68128900  |
| F | 4.72391500  | 1.09602500  | 3.51838400  |
| F | 2.63956500  | 1.64915000  | 3.41794600  |
| F | 4.08598500  | 2.60931200  | 2.12276900  |
| C | -0.23243500 | -0.22003500 | -2.38775400 |
| C | -0.43493300 | -1.57121600 | -2.09049900 |
| C | -1.71545200 | -2.11100900 | -2.09039000 |
| C | -2.80702300 | -1.30261600 | -2.41007800 |
| C | -2.60796000 | 0.02950500  | -2.75753400 |
| C | -1.32339800 | 0.57018000  | -2.74738900 |
| H | -4.89208500 | 1.70197200  | 0.18203300  |
| H | -0.60405900 | 1.45735300  | 0.16813100  |

|   |             |             |             |
|---|-------------|-------------|-------------|
| H | -2.94285200 | -1.91672200 | 1.44160000  |
| H | 0.38040900  | -0.35011000 | 0.62182300  |
| H | 1.52414200  | -3.50294000 | 1.00060200  |
| H | 1.87396500  | -0.53302400 | 2.68845200  |
| H | 5.10823800  | 1.10562100  | 0.37941500  |
| H | 3.05043900  | -2.40995100 | -0.99223000 |
| H | 1.95782100  | -0.20809700 | -2.66067100 |
| H | 2.34331100  | 2.19395000  | -2.14056400 |
| H | 0.54827900  | 2.44465300  | -1.78527400 |
| H | 0.41496200  | -2.19241900 | -1.81199200 |
| H | -1.86455800 | -3.14903700 | -1.81271900 |
| H | -3.81215100 | -1.71070100 | -2.37365600 |
| H | -3.45276000 | 0.66201900  | -3.00933900 |
| H | -1.18096400 | 1.61849300  | -2.99312600 |



**COM-III**

|   |             |             |             |
|---|-------------|-------------|-------------|
| C | 5.19227400  | -0.10835800 | 0.75880200  |
| C | 4.16515400  | 0.34737700  | 1.57453000  |
| C | 2.84977200  | 0.36273400  | 1.12680100  |
| C | 2.54567400  | -0.07516900 | -0.16179100 |
| C | 3.56998600  | -0.51500400 | -1.00229900 |
| C | 4.87490800  | -0.53550200 | -0.52560700 |
| N | 1.20569100  | 0.02742100  | -0.58823700 |
| C | 0.49782800  | -0.85214800 | -1.35763900 |
| N | -0.79647900 | -0.49615600 | -1.59744500 |
| S | 1.07467100  | -2.30355600 | -1.95654400 |
| C | -1.51909700 | 0.62400200  | -1.14148300 |
| C | -1.02574200 | 1.92762400  | -1.23322800 |
| C | -1.80830200 | 2.99033500  | -0.78759100 |
| C | -3.08566800 | 2.78893100  | -0.28292500 |
| C | -3.57710700 | 1.48749500  | -0.22809100 |
| C | -2.80874500 | 0.41079200  | -0.64343100 |
| O | -2.71152900 | -2.56605700 | -1.85739400 |
| C | -2.33380900 | -3.29761200 | -0.68674500 |
| C | -2.71480200 | -3.98669900 | -1.93310100 |
| C | 5.95909300  | -1.05950600 | -1.42837300 |
| F | 5.76186200  | -0.68407000 | -2.69903100 |
| F | 6.00159700  | -2.39784900 | -1.41410400 |
| F | 7.16781300  | -0.61783200 | -1.05423500 |
| C | 4.45598400  | 0.77632900  | 2.98582900  |
| F | 3.65768500  | 1.78580400  | 3.36367100  |
| F | 5.72404200  | 1.17804600  | 3.12984300  |
| F | 4.25495700  | -0.22592100 | 3.85348400  |
| C | -4.94375300 | 1.20774200  | 0.33919600  |
| F | -4.86457000 | 0.70184500  | 1.57653900  |
| F | -5.60624700 | 0.31059100  | -0.40701700 |
| F | -5.68999900 | 2.31697900  | 0.40284400  |
| C | -1.22797500 | 4.37587500  | -0.87739300 |
| F | -0.78160000 | 4.63505800  | -2.11334800 |
| F | -0.18111500 | 4.51180500  | -0.04919300 |
| F | -2.12339200 | 5.31497300  | -0.55803000 |
| C | -3.25627900 | -3.17653200 | 0.47681600  |
| C | -2.82505500 | -3.56342200 | 1.74590700  |
| C | -3.67367500 | -3.43682500 | 2.84100500  |
| C | -4.95015700 | -2.90339200 | 2.67824500  |
| C | -5.37933400 | -2.50529600 | 1.41452700  |
| C | -4.54026600 | -2.65077800 | 0.31468200  |
| H | 6.21801900  | -0.11360100 | 1.10751400  |
| H | 2.06229300  | 0.71920600  | 1.78476300  |

|   |             |             |             |
|---|-------------|-------------|-------------|
| H | 3.35145000  | -0.82953500 | -2.01433800 |
| H | 0.65923800  | 0.71282200  | -0.08064700 |
| H | -1.35116200 | -1.24880000 | -2.00717200 |
| H | -0.05488800 | 2.11816100  | -1.68120900 |
| H | -3.68960600 | 3.62662600  | 0.04344200  |
| H | -3.20306400 | -0.59921100 | -0.58819600 |
| H | -1.26600800 | -3.24856700 | -0.46764900 |
| H | -1.93656200 | -4.41036000 | -2.56259000 |
| H | -3.70517300 | -4.43116700 | -1.99992800 |
| H | -1.82198500 | -3.96131200 | 1.87477700  |
| H | -3.33322100 | -3.74298500 | 3.82484000  |
| H | -5.60511300 | -2.78984300 | 3.53586300  |
| H | -6.36363900 | -2.06754400 | 1.28378400  |
| H | -4.86230800 | -2.33021300 | -0.67229500 |

**COM-IV**

|   |             |             |             |
|---|-------------|-------------|-------------|
| C | -3.42770100 | 0.43214400  | -0.33301300 |
| C | -3.37413500 | -0.82308400 | 0.26590000  |
| C | -2.63700800 | -1.03270300 | 1.42244900  |
| C | -1.94923800 | 0.03346800  | 2.00484900  |
| C | -2.04531600 | 1.30844100  | 1.45242900  |
| C | -2.76114300 | 1.48828600  | 0.27434400  |
| N | -1.10683200 | -0.22055700 | 3.11082800  |
| C | 0.14156100  | 0.28284600  | 3.35968700  |
| N | 0.79188100  | 0.90584100  | 2.33063500  |
| S | 0.83932100  | 0.13644400  | 4.86695200  |
| C | 0.74565700  | 0.54440000  | 0.96229700  |
| C | 0.47975300  | -0.76318000 | 0.56269900  |
| C | 0.44472900  | -1.07566700 | -0.78980900 |
| C | 0.70758400  | -0.11410800 | -1.75705700 |
| C | 1.00515300  | 1.17892400  | -1.34113000 |
| C | 1.01709500  | 1.51957600  | 0.00479200  |
| O | 3.55506400  | 1.16286500  | 1.79566800  |
| C | 3.71200000  | -0.25368900 | 1.72061200  |
| C | 4.78062400  | 0.60966000  | 2.25636600  |
| C | -2.72690000 | 2.84186100  | -0.38082700 |
| F | -1.57895700 | 3.01930300  | -1.05534400 |
| F | -2.80375000 | 3.82543400  | 0.52469100  |
| F | -3.73094500 | 3.00026900  | -1.24986800 |
| C | -4.11961900 | -1.96275200 | -0.37467000 |
| F | -3.96097500 | -1.95615400 | -1.70361100 |
| F | -5.43601400 | -1.87416200 | -0.13492900 |
| F | -3.70777800 | -3.14977800 | 0.08531100  |
| C | 1.39541600  | 2.21599800  | -2.35530800 |
| F | 0.89671100  | 1.94066900  | -3.56626000 |
| F | 2.73360500  | 2.28341700  | -2.48688700 |
| F | 0.97789400  | 3.43755000  | -2.00288600 |
| C | 0.06891900  | -2.47426700 | -1.18759100 |
| F | -1.26707200 | -2.63615700 | -1.17549000 |
| F | 0.57291900  | -3.38283900 | -0.33778700 |
| F | 0.49640500  | -2.78120400 | -2.41660200 |
| C | 3.77002600  | -0.84210400 | 0.35201900  |
| C | 3.50637000  | -2.20065600 | 0.16928700  |
| C | 3.51564200  | -2.75145200 | -1.10789500 |
| C | 3.78593600  | -1.94559900 | -2.21180700 |
| C | 4.04985800  | -0.58970200 | -2.03286400 |
| C | 4.04083800  | -0.03749600 | -0.75491300 |
| H | -3.97311900 | 0.58189300  | -1.25810700 |
| H | -2.55059200 | -2.03066200 | 1.84024600  |

|   |             |             |             |
|---|-------------|-------------|-------------|
| H | -1.52438200 | 2.14170100  | 1.91261100  |
| H | -1.47131400 | -0.77890300 | 3.87108800  |
| H | 1.67147100  | 1.33592800  | 2.61179800  |
| H | 0.31012300  | -1.53714000 | 1.30543700  |
| H | 0.69722600  | -0.36913900 | -2.81014600 |
| H | 1.23293100  | 2.53734400  | 0.31358100  |
| H | 3.10850700  | -0.79989000 | 2.44918100  |
| H | 4.93780400  | 0.66447700  | 3.33071400  |
| H | 5.64040300  | 0.82133000  | 1.62413600  |
| H | 3.26448900  | -2.82237700 | 1.02794900  |
| H | 3.28893000  | -3.80392300 | -1.24345100 |
| H | 3.77812000  | -2.37232000 | -3.20967900 |
| H | 4.23919800  | 0.04935200  | -2.88950900 |
| H | 4.20021300  | 1.02729700  | -0.61079100 |

**COM-V**

|   |             |             |             |
|---|-------------|-------------|-------------|
| C | 5.81351700  | -0.61694200 | 0.03669700  |
| N | 5.23431500  | 0.51024400  | 0.47357100  |
| C | 3.90664300  | 0.73959000  | 0.36920200  |
| C | 3.07571600  | -0.21395000 | -0.21691300 |
| C | 3.67256700  | -1.40554900 | -0.67268000 |
| C | 5.03316000  | -1.60412900 | -0.54671900 |
| C | 6.05628600  | 1.56553700  | 1.11363400  |
| C | 0.82523800  | 0.92308600  | -0.15429800 |
| S | 1.22966600  | 2.39696000  | 0.48895500  |
| C | -1.64007300 | 1.26327200  | -0.44956500 |
| C | -1.72540300 | 2.65282000  | -0.50792000 |
| N | -2.92744700 | 3.26352500  | -0.46132700 |
| C | -4.08105300 | 2.58000600  | -0.37479000 |
| C | -4.05465200 | 1.19645400  | -0.34621200 |
| C | -2.83918900 | 0.53514000  | -0.38325600 |
| C | -2.94932700 | 4.74359800  | -0.54034300 |
| O | 0.08328700  | -2.29974200 | -1.21926500 |
| C | -0.66256600 | -3.33133100 | -0.53314300 |
| C | -0.68403400 | -3.23193100 | -1.99780500 |
| C | -1.79434700 | -2.83420000 | 0.30333300  |
| C | -1.51054000 | -2.08324500 | 1.45005000  |
| C | -2.54518100 | -1.59502100 | 2.24157800  |
| C | -3.87089000 | -1.86477800 | 1.89685800  |
| C | -4.15822800 | -2.61850000 | 0.76061600  |
| C | -3.12130900 | -3.10148300 | -0.03853300 |
| H | 6.88523800  | -0.70435300 | 0.16449500  |
| H | 3.54345900  | 1.67960000  | 0.75603800  |
| H | 3.04867600  | -2.17027900 | -1.12852900 |
| H | 5.50188900  | -2.51509300 | -0.89831200 |
| H | 1.29383600  | -0.94634900 | -0.81037300 |
| H | 7.10488400  | 1.28278500  | 1.05451700  |
| H | 5.89571100  | 2.50414700  | 0.58393100  |
| H | 5.75470100  | 1.66001400  | 2.15705400  |
| H | -0.57387300 | -0.44470900 | -0.74736400 |
| H | -0.86197100 | 3.29546900  | -0.59290800 |
| H | -4.99428900 | 3.16055800  | -0.33646800 |
| H | -4.98420400 | 0.64391900  | -0.28231700 |
| H | -2.81233300 | -0.55092000 | -0.35490100 |
| H | -2.67897300 | 5.04648900  | -1.55243400 |
| H | -3.95093400 | 5.09512900  | -0.30264600 |
| H | -2.23846200 | 5.14462100  | 0.18101600  |
| H | -0.01632100 | -4.08611600 | -0.08843700 |
| H | -0.09075000 | -3.91685700 | -2.59497800 |

|   |             |             |             |
|---|-------------|-------------|-------------|
| H | -1.55374100 | -2.79855300 | -2.48442100 |
| H | -0.47581800 | -1.89000000 | 1.72523900  |
| H | -2.32036100 | -1.02270800 | 3.13537600  |
| H | -4.67777700 | -1.50480800 | 2.52695100  |
| H | -5.18726300 | -2.84873300 | 0.50464200  |
| H | -3.34567300 | -3.70315600 | -0.91467800 |
| N | 1.70152500  | -0.10976700 | -0.39107700 |
| N | -0.44905300 | 0.54254400  | -0.51093900 |

**COM-VI**

|   |             |             |             |
|---|-------------|-------------|-------------|
| C | 5.73351100  | 0.32167300  | 0.83049200  |
| N | 5.33816400  | -0.14475100 | -0.36627500 |
| C | 4.03029200  | -0.21892100 | -0.69304300 |
| C | 3.04588500  | 0.15856100  | 0.20711300  |
| C | 3.44143200  | 0.62554400  | 1.47056600  |
| C | 4.79277400  | 0.71602900  | 1.76756900  |
| C | 6.33917300  | -0.57989100 | -1.36853900 |
| C | 0.73161900  | 0.98016800  | -0.00354400 |
| S | 1.01635300  | 2.46135000  | 0.68619500  |
| C | -1.70633300 | 1.18955000  | -0.47640200 |
| C | -1.84862000 | 2.57281400  | -0.55594700 |
| N | -3.07571700 | 3.13190300  | -0.55403000 |
| C | -4.20087100 | 2.39786300  | -0.49650100 |
| C | -4.11553100 | 1.01743800  | -0.45655100 |
| C | -2.87139800 | 0.40831900  | -0.44711300 |
| C | -3.15616700 | 4.61080800  | -0.60535800 |
| O | 0.21637200  | -2.17481900 | -1.27228200 |
| C | -0.45220900 | -3.28273500 | -0.62686300 |
| C | -0.46961600 | -3.13738900 | -2.08747600 |
| C | -1.62659900 | -2.89903900 | 0.21135400  |
| C | -1.41001000 | -2.16150400 | 1.38052200  |
| C | -2.48562900 | -1.76392300 | 2.16839200  |
| C | -3.78522000 | -2.11358900 | 1.79728800  |
| C | -4.00528900 | -2.85784600 | 0.64032400  |
| C | -2.92737500 | -3.24876000 | -0.15539800 |
| H | 6.80070900  | 0.35921900  | 1.01227800  |
| H | 3.80076300  | -0.58144800 | -1.68929600 |
| H | 2.69372200  | 0.89979300  | 2.20387000  |
| H | 5.12972400  | 1.07428100  | 2.73260400  |
| H | 1.46832800  | -0.80733900 | -0.72429200 |
| H | 6.18296500  | -0.01908500 | -2.29002100 |
| H | 7.33583100  | -0.37845300 | -0.98208300 |
| H | 6.22075100  | -1.64916900 | -1.54557800 |
| H | -0.51590900 | -0.45165900 | -0.75241200 |
| H | -1.00810400 | 3.24816600  | -0.62041400 |
| H | -5.13919600 | 2.93830300  | -0.48844000 |
| H | -5.02233100 | 0.42605000  | -0.42116800 |
| H | -2.79628700 | -0.67501400 | -0.40828400 |
| H | -4.19595600 | 4.90450100  | -0.73095000 |
| H | -2.76236000 | 5.01732700  | 0.32643800  |
| H | -2.57015600 | 4.96474300  | -1.45308100 |
| H | 0.24665900  | -3.99945000 | -0.19956100 |
| H | 0.17885900  | -3.75625000 | -2.69916600 |

|   |             |             |             |
|---|-------------|-------------|-------------|
| H | -1.36736400 | -2.75836900 | -2.56875300 |
| H | -0.39415000 | -1.90453600 | 1.67317500  |
| H | -2.31259800 | -1.19982400 | 3.07885500  |
| H | -4.62348300 | -1.82291300 | 2.42200400  |
| H | -5.01284500 | -3.15013800 | 0.36336000  |
| H | -3.09832700 | -3.84037000 | -1.05037800 |
| N | 1.70514100  | 0.01612800  | -0.17035000 |
| N | -0.47541500 | 0.53494400  | -0.48004400 |



**COM-VII**

|   |             |             |             |
|---|-------------|-------------|-------------|
| C | 5.97112600  | 0.82442700  | -0.41778200 |
| N | 5.50513000  | -0.39406400 | -0.09842600 |
| C | 4.19736700  | -0.63449200 | 0.12817000  |
| C | 3.26510300  | 0.39542600  | 0.01570900  |
| C | 3.74188500  | 1.67894800  | -0.29538800 |
| C | 5.09243600  | 1.89125900  | -0.50940900 |
| C | 6.43880900  | -1.54110700 | 0.00683600  |
| C | 1.10669200  | -0.86072200 | 0.11273200  |
| S | 1.62733900  | -2.37193100 | -0.32733200 |
| C | -1.26170000 | -1.48375500 | 0.29186800  |
| C | -2.38860600 | -1.17976800 | -0.46254600 |
| N | -3.40889600 | -2.05511500 | -0.54759200 |
| C | -3.37502400 | -3.24217500 | 0.09008100  |
| C | -2.28658300 | -3.58450700 | 0.86748100  |
| C | -1.21989600 | -2.70041900 | 0.97891400  |
| C | -4.59181200 | -1.73963500 | -1.38011900 |
| O | 0.10467500  | 2.46925100  | 0.45971900  |
| C | -0.98910600 | 3.06352100  | -0.26059400 |
| C | -0.33853300 | 3.77391200  | 0.85297300  |
| C | -2.31075900 | 2.39683700  | -0.08708100 |
| C | -3.24352300 | 2.43060100  | -1.12597300 |
| C | -4.50553900 | 1.86446700  | -0.95041000 |
| C | -4.83365300 | 1.24688900  | 0.25636300  |
| C | -3.89652900 | 1.19053400  | 1.28796500  |
| C | -2.63939400 | 1.76522500  | 1.11783100  |
| H | 7.03626200  | 0.91524900  | -0.59011700 |
| H | 3.92673500  | -1.64681800 | 0.38974000  |
| H | 3.03698300  | 2.50187000  | -0.37552900 |
| H | 5.47405900  | 2.87378400  | -0.75862500 |
| H | 1.41288700  | 1.13964400  | 0.37915800  |
| H | 6.20414900  | -2.25746100 | -0.78080600 |
| H | 7.45790800  | -1.17938100 | -0.10938400 |
| H | 6.32037200  | -2.00058200 | 0.98775600  |
| H | -0.47203300 | 0.42548800  | 0.49267000  |
| H | -2.49543600 | -0.24366400 | -1.00321500 |
| H | -4.23697300 | -3.88605000 | -0.04447200 |
| H | -2.28243200 | -4.53524000 | 1.38638300  |
| H | -0.36310800 | -2.94328200 | 1.59524300  |
| H | -5.47210500 | -1.69475100 | -0.73828800 |
| H | -4.43897400 | -0.77525600 | -1.85879500 |
| H | -4.70746400 | -2.52001900 | -2.13227900 |
| H | -0.73640700 | 3.36978700  | -1.27371800 |
| H | 0.36429500  | 4.57402800  | 0.64063300  |

|   |             |             |             |
|---|-------------|-------------|-------------|
| H | -0.84493700 | 3.81472200  | 1.81368100  |
| H | -2.99665400 | 2.92792800  | -2.05994500 |
| H | -5.23960000 | 1.93014000  | -1.74768700 |
| H | -5.82811700 | 0.83670100  | 0.40325700  |
| H | -4.15383700 | 0.72558100  | 2.23429300  |
| H | -1.91846800 | 1.74153000  | 1.93262300  |
| N | 1.90005200  | 0.25322200  | 0.24104400  |
| N | -0.21321400 | -0.55116500 | 0.35801000  |

**COM-VIII**

|   |             |             |             |
|---|-------------|-------------|-------------|
| C | -6.08417700 | -0.28755400 | 0.01870400  |
| N | -5.38359100 | 0.72622000  | 0.55301300  |
| C | -4.03689400 | 0.77088500  | 0.46800400  |
| C | -3.32719400 | -0.21788700 | -0.19694100 |
| C | -4.04733800 | -1.27206600 | -0.78360100 |
| C | -5.42709100 | -1.30296500 | -0.65782900 |
| C | -6.07856500 | 1.81986800  | 1.27053500  |
| C | -1.03045500 | -1.10730200 | -0.13347400 |
| S | -1.43030100 | -2.65745600 | 0.28949000  |
| C | 1.39941900  | -1.46256200 | -0.17301300 |
| C | 2.45947200  | -0.98666100 | 0.58976700  |
| N | 3.56998000  | -1.72899200 | 0.75786500  |
| C | 3.69434300  | -2.94864700 | 0.19698800  |
| C | 2.67874800  | -3.46038900 | -0.58524600 |
| C | 1.52192700  | -2.71518900 | -0.78325900 |
| C | 4.68111300  | -1.22409400 | 1.59546900  |
| O | -0.32847100 | 2.29473500  | -0.44660500 |
| C | 0.74332200  | 3.04588400  | 0.14980400  |
| C | -0.03714900 | 3.59595500  | -0.97038700 |
| C | 2.11015700  | 2.48897600  | -0.05594800 |
| C | 3.08914500  | 2.67507200  | 0.92304300  |
| C | 4.38328500  | 2.19958400  | 0.71608200  |
| C | 4.69968400  | 1.52027900  | -0.46012400 |
| C | 3.71927100  | 1.31443400  | -1.43108900 |
| C | 2.42987700  | 1.79984100  | -1.23121700 |
| H | -7.16013200 | -0.25577200 | 0.13858300  |
| H | -3.54979000 | 1.61286900  | 0.94759700  |
| H | -3.52502200 | -2.04322500 | -1.33436100 |
| H | -6.00819400 | -2.10338800 | -1.09949100 |
| H | -1.57531200 | 0.86657700  | -0.32940700 |
| H | -5.70399900 | 1.86552500  | 2.29321300  |
| H | -5.89136600 | 2.75965400  | 0.75076900  |
| H | -7.14622300 | 1.61235800  | 1.28122300  |
| H | 0.40732800  | 0.33676000  | -0.47889700 |
| H | 2.44208100  | -0.01367400 | 1.07174100  |
| H | 4.61915200  | -3.47854400 | 0.39481400  |
| H | 2.80065700  | -4.43507600 | -1.04157500 |
| H | 0.72212000  | -3.09259300 | -1.40775700 |
| H | 4.38505200  | -0.27649200 | 2.03943100  |
| H | 4.88925700  | -1.95658900 | 2.37534800  |
| H | 5.55902300  | -1.07543000 | 0.96578800  |
| H | 0.52191600  | 3.41324000  | 1.14996300  |
| H | -0.79931600 | 4.34448300  | -0.77547800 |

|   |             |             |             |
|---|-------------|-------------|-------------|
| H | 0.40621000  | 3.60259900  | -1.96270600 |
| H | 2.84896500  | 3.21896200  | 1.83249700  |
| H | 5.14888000  | 2.38011200  | 1.46441300  |
| H | 5.71560700  | 1.17881700  | -0.63387200 |
| H | 3.96585600  | 0.80085400  | -2.35475000 |
| H | 1.67376300  | 1.65894500  | -2.00086500 |
| N | -1.94055800 | -0.08547900 | -0.29663900 |
| N | 0.25712100  | -0.65922300 | -0.32035800 |

**TS1(IA)**Value of imaginary frequency = -479.6 cm<sup>-1</sup>

|   |             |             |             |
|---|-------------|-------------|-------------|
| C | -5.15910300 | 0.57468900  | -0.40787600 |
| C | -4.55069800 | -0.60732700 | -0.82782500 |
| C | -3.24653000 | -0.61700600 | -1.28383700 |
| C | -2.50116600 | 0.57314400  | -1.31517100 |
| C | -3.10586100 | 1.77049000  | -0.93280600 |
| C | -4.42379300 | 1.74678000  | -0.47778300 |
| N | -1.17694400 | 0.42672400  | -1.74413600 |
| C | -0.06381900 | 1.16902500  | -1.46577100 |
| N | 1.04273300  | 0.52950700  | -1.98409300 |
| S | -0.02297600 | 2.59003200  | -0.59261900 |
| C | 2.37363800  | 0.60634500  | -1.56761600 |
| C | 3.02675500  | 1.73740400  | -1.06297900 |
| C | 4.34599200  | 1.62211400  | -0.62851800 |
| C | 5.04640700  | 0.42210900  | -0.67482400 |
| C | 4.39513100  | -0.68419000 | -1.21109100 |
| C | 3.09092600  | -0.59587200 | -1.66927700 |
| O | 0.06591500  | -2.06670900 | -1.98923500 |
| C | 0.49829900  | -2.05199400 | -0.04443400 |
| C | 0.64230200  | -3.00548200 | -1.15986700 |
| C | -5.02221000 | 3.03450300  | 0.01605400  |
| F | -4.67334700 | 4.07113200  | -0.75632000 |
| F | -4.60692100 | 3.31558400  | 1.26167600  |
| F | -6.36138300 | 2.98223100  | 0.04948200  |
| C | -5.33703300 | -1.88262900 | -0.73374100 |
| F | -6.43804300 | -1.84287700 | -1.49627700 |
| F | -5.75477000 | -2.10122000 | 0.52857400  |
| F | -4.62452800 | -2.95411500 | -1.10602600 |
| C | 5.02235900  | -2.04396000 | -1.15683500 |
| F | 6.34746500  | -1.99655000 | -1.02188100 |
| F | 4.73266500  | -2.78245700 | -2.23207500 |
| F | 4.54549000  | -2.73579100 | -0.08554200 |
| C | 5.00294700  | 2.83954200  | -0.03557400 |
| F | 4.61953200  | 3.02732600  | 1.24149000  |
| F | 4.68246600  | 3.95124700  | -0.70417800 |
| F | 6.33750100  | 2.73103700  | -0.02989700 |
| C | -0.76486700 | -1.83896300 | 0.67850600  |
| C | -0.99166700 | -0.59545700 | 1.28133400  |
| C | -2.17530100 | -0.35317700 | 1.97256400  |
| C | -3.13043500 | -1.35923500 | 2.08251400  |
| C | -2.90327300 | -2.60961800 | 1.50303300  |
| C | -1.72797100 | -2.84989200 | 0.80401300  |
| H | -6.18063700 | 0.57877800  | -0.04443600 |

|   |             |             |             |
|---|-------------|-------------|-------------|
| H | -2.77365600 | -1.55001500 | -1.57930600 |
| H | -2.56101000 | 2.70264800  | -0.97237600 |
| H | -0.96611600 | -0.54362400 | -2.00422000 |
| H | 0.82381100  | -0.42157200 | -2.31805100 |
| H | 2.51353500  | 2.68716200  | -1.00876700 |
| H | 6.06569300  | 0.35364500  | -0.31457700 |
| H | 2.59961800  | -1.46894000 | -2.09261800 |
| H | 1.13882700  | -1.17880800 | -0.11969900 |
| H | 1.69436600  | -3.26298000 | -1.38041800 |
| H | 0.07812200  | -3.94389800 | -1.05154500 |
| H | -0.24810000 | 0.19417600  | 1.18703600  |
| H | -2.35278100 | 0.62686200  | 2.40382400  |
| H | -4.06630400 | -1.16940900 | 2.59861000  |
| H | -3.66135400 | -3.38233200 | 1.57199100  |
| H | -1.56935800 | -3.81534100 | 0.33290900  |
| N | 1.72739600  | -2.64703500 | 1.51148800  |
| H | 1.34625100  | -3.48329400 | 1.94402300  |
| H | 2.60672700  | -2.85897500 | 1.04299900  |
| C | 1.83031700  | -1.54572400 | 2.40503200  |
| C | 1.00856300  | -1.47313500 | 3.52758200  |
| C | 2.64872600  | -0.47046800 | 2.05623900  |
| C | 1.01511300  | -0.31979200 | 4.30579300  |
| H | 0.34763500  | -2.30098100 | 3.77120900  |
| C | 2.64140400  | 0.68129800  | 2.83506800  |
| H | 3.28544400  | -0.53916600 | 1.17788400  |
| C | 1.82401400  | 0.75977800  | 3.96106200  |
| H | 0.37202200  | -0.26325500 | 5.17775300  |
| H | 3.27011500  | 1.51727400  | 2.54788900  |
| H | 1.81500300  | 1.66110400  | 4.56380000  |

**TS1(IB)**Value of imaginary frequency = -603.5 cm<sup>-1</sup>

|   |             |             |             |
|---|-------------|-------------|-------------|
| C | 5.43141300  | -0.06853100 | -0.19810300 |
| C | 4.56081400  | 0.86946400  | -0.74701200 |
| C | 3.26851100  | 0.52235100  | -1.09629600 |
| C | 2.80403000  | -0.78338600 | -0.88507800 |
| C | 3.67024500  | -1.74118300 | -0.35494000 |
| C | 4.96891000  | -1.36369600 | -0.01836100 |
| N | 1.47749800  | -1.01103400 | -1.27595300 |
| C | 0.56761400  | -1.93984900 | -0.85419500 |
| N | -0.63985100 | -1.71283900 | -1.48365000 |
| S | 0.83523100  | -3.13148100 | 0.27932700  |
| C | -1.91117600 | -2.07232200 | -1.01333700 |
| C | -2.26599400 | -3.32363300 | -0.49689200 |
| C | -3.55823800 | -3.51101900 | -0.01739400 |
| C | -4.50841600 | -2.49304100 | -0.01858000 |
| C | -4.14964400 | -1.26986200 | -0.56925100 |
| C | -2.88018400 | -1.06859600 | -1.08988400 |
| O | -0.44008200 | 1.07903800  | -1.58994400 |
| C | -0.60836600 | 1.11355800  | -0.20380200 |
| C | -1.59765800 | 2.13395300  | -0.55942600 |
| C | 5.88293100  | -2.38195400 | 0.60602700  |
| F | 5.57553700  | -3.62786700 | 0.22645300  |
| F | 5.81448900  | -2.34722200 | 1.94604500  |
| F | 7.16412400  | -2.15921200 | 0.27572700  |
| C | 5.05349100  | 2.27394400  | -0.94567000 |
| F | 4.14084900  | 3.05582100  | -1.53905300 |
| F | 6.16154000  | 2.30269900  | -1.69988200 |
| F | 5.37522700  | 2.85459100  | 0.22520900  |
| C | -5.06613700 | -0.08859200 | -0.48900000 |
| F | -6.34824600 | -0.42764700 | -0.36998400 |
| F | -4.94158900 | 0.72904000  | -1.54495900 |
| F | -4.76641800 | 0.68096100  | 0.59796400  |
| C | -3.97514100 | -4.86463400 | 0.49173200  |
| F | -2.92724000 | -5.64812900 | 0.76019400  |
| F | -4.73765500 | -5.50405600 | -0.40801800 |
| F | -4.70636700 | -4.75665900 | 1.61196300  |
| C | 0.59031700  | 1.52517400  | 0.61489900  |
| C | 1.09355500  | 0.65788700  | 1.58504200  |
| C | 2.26207200  | 0.97153000  | 2.27675100  |
| C | 2.92849300  | 2.16319900  | 2.00948700  |
| C | 2.42595700  | 3.04154600  | 1.04905600  |
| C | 1.26677500  | 2.72093200  | 0.35118600  |
| H | 6.44823800  | 0.20068700  | 0.06643700  |

|   |             |             |             |
|---|-------------|-------------|-------------|
| H | 2.59533000  | 1.26744900  | -1.50904100 |
| H | 3.34359800  | -2.75973000 | -0.20471100 |
| H | 1.05164300  | -0.18648900 | -1.71211300 |
| H | -0.67306200 | -0.79004000 | -1.93529300 |
| H | -1.54421800 | -4.12699400 | -0.45559900 |
| H | -5.49656100 | -2.65426000 | 0.39761700  |
| H | -2.60528200 | -0.12061300 | -1.54308000 |
| H | -1.04910500 | 0.20096200  | 0.23561100  |
| H | -2.53543200 | 1.81802300  | -1.00140200 |
| H | -1.22701100 | 3.10668500  | -0.86191400 |
| H | 0.59583700  | -0.29381600 | 1.76263800  |
| H | 2.66016300  | 0.27350500  | 3.00609600  |
| H | 3.85102300  | 2.40119300  | 2.52854000  |
| H | 2.96419400  | 3.95503100  | 0.81838500  |
| H | 0.91553300  | 3.37757000  | -0.44147000 |
| N | -2.47053700 | 2.79311500  | 1.05813700  |
| H | -3.12794800 | 2.05709100  | 1.30907400  |
| H | -1.72587500 | 2.84154400  | 1.75089800  |
| C | -3.10817000 | 4.04771100  | 0.82848100  |
| C | -4.40023600 | 4.07238500  | 0.30650500  |
| C | -2.39718600 | 5.22956000  | 1.02848200  |
| C | -4.98823900 | 5.29573600  | 0.00469000  |
| H | -4.93138100 | 3.13951100  | 0.14128000  |
| C | -2.99724100 | 6.44647600  | 0.72292300  |
| H | -1.38378700 | 5.19206200  | 1.42045800  |
| C | -4.29225200 | 6.48405600  | 0.21280400  |
| H | -5.99636200 | 5.31803300  | -0.39536600 |
| H | -2.44886800 | 7.36821600  | 0.88597900  |
| H | -4.75683700 | 7.43522900  | -0.02241100 |



**TS1(IIA)**Value of imaginary frequency = -497.0 cm<sup>-1</sup>

|   |             |             |             |
|---|-------------|-------------|-------------|
| C | 4.38699100  | -0.96576200 | -0.72500300 |
| C | 3.18709100  | -1.36434600 | -1.30773100 |
| C | 2.00189300  | -1.36551600 | -0.59361900 |
| C | 1.98337100  | -0.94016400 | 0.74568000  |
| C | 3.18234600  | -0.55701400 | 1.35166000  |
| C | 4.35888300  | -0.57440900 | 0.60411000  |
| N | 0.70531700  | -0.91185100 | 1.33609300  |
| C | 0.31958000  | -0.51719100 | 2.57127600  |
| N | -1.04062000 | -0.56056200 | 2.78196500  |
| S | 1.26850600  | 0.04512600  | 3.83731500  |
| C | -2.03348700 | -1.06475200 | 1.90954100  |
| C | -2.00040200 | -2.39255800 | 1.48349700  |
| C | -2.93619000 | -2.83828900 | 0.56165000  |
| C | -3.91106700 | -1.98624400 | 0.05666500  |
| C | -3.95360000 | -0.67618400 | 0.51625300  |
| C | -3.03471100 | -0.21326700 | 1.45122000  |
| O | -0.99755800 | -0.98451800 | -0.86628100 |
| C | -1.16874500 | 0.99054900  | -1.13815300 |
| C | -1.35178400 | -0.23031200 | -1.95218700 |
| C | 5.60680000  | -0.04065800 | 1.24638500  |
| F | 5.70639000  | -0.39662900 | 2.53186100  |
| F | 5.62820200  | 1.30737900  | 1.21487400  |
| F | 6.71458300  | -0.45980000 | 0.61836500  |
| C | 3.15241400  | -1.66362400 | -2.77617600 |
| F | 4.27925700  | -2.25269200 | -3.19767400 |
| F | 3.02356300  | -0.52541800 | -3.49569600 |
| F | 2.12455800  | -2.44905400 | -3.11677300 |
| C | -4.90932600 | 0.29697200  | -0.10212300 |
| F | -6.01432600 | -0.28449600 | -0.56711600 |
| F | -4.33452200 | 0.93118400  | -1.16395300 |
| F | -5.27141800 | 1.26919300  | 0.74645000  |
| C | -2.92568700 | -4.27488400 | 0.11706300  |
| F | -3.78210100 | -5.01127400 | 0.84302100  |
| F | -1.71573300 | -4.82758200 | 0.24716500  |
| F | -3.30038000 | -4.39159800 | -1.16365800 |
| C | 0.17741800  | 1.50432600  | -0.81391500 |
| C | 0.41555400  | 2.04572500  | 0.45373000  |
| C | 1.68192100  | 2.50196400  | 0.79988500  |
| C | 2.71664900  | 2.44734300  | -0.13324400 |
| C | 2.47946200  | 1.94310300  | -1.41049200 |
| C | 1.21552700  | 1.47038800  | -1.74962500 |
| H | 5.31218000  | -0.96456300 | -1.28993300 |

|   |             |             |             |
|---|-------------|-------------|-------------|
| H | 1.06272700  | -1.64622100 | -1.06513100 |
| H | 3.20094400  | -0.23211900 | 2.38178400  |
| H | -0.03321600 | -0.97841900 | 0.60977800  |
| H | -1.31892900 | -0.15246800 | 3.66336100  |
| H | -1.22475800 | -3.05784900 | 1.84803300  |
| H | -4.62052600 | -2.33861800 | -0.68398500 |
| H | -3.05952700 | 0.81983300  | 1.78810800  |
| H | -1.90948100 | 1.08676600  | -0.35142100 |
| H | -2.39375900 | -0.36408400 | -2.29830600 |
| H | -0.68354100 | -0.29859300 | -2.82992500 |
| H | -0.39186800 | 2.07570500  | 1.18341300  |
| H | 1.86449900  | 2.87284700  | 1.80282000  |
| H | 3.71564800  | 2.76525900  | 0.14645800  |
| H | 3.28679200  | 1.87637500  | -2.13263100 |
| H | 1.05604600  | 1.03056600  | -2.73023100 |
| N | -1.93581700 | 2.55600800  | -2.07901100 |
| H | -1.39362600 | 2.68083700  | -2.92969100 |
| H | -2.87722400 | 2.24337000  | -2.30529500 |
| C | -1.91792400 | 3.70344500  | -1.23459900 |
| C | -0.83944200 | 4.58442100  | -1.28954700 |
| C | -2.91778300 | 3.86177100  | -0.27481200 |
| C | -0.77198700 | 5.63987300  | -0.38780300 |
| H | -0.04635900 | 4.42583500  | -2.01550900 |
| C | -2.83794200 | 4.92286700  | 0.62187400  |
| H | -3.74855700 | 3.16288900  | -0.23408400 |
| C | -1.76895800 | 5.81357800  | 0.56893600  |
| H | 0.06951100  | 6.32301700  | -0.42942100 |
| H | -3.61769200 | 5.05196300  | 1.36511200  |
| H | -1.71092800 | 6.63679700  | 1.27239100  |

**TS1(IIb)**Value of imaginary frequency = -620.6 cm<sup>-1</sup>

|   |             |             |             |
|---|-------------|-------------|-------------|
| C | -5.24683900 | 0.70689400  | 0.59548000  |
| C | -4.04410100 | 1.38636300  | 0.46269000  |
| C | -2.89238100 | 0.72968000  | 0.04949100  |
| C | -2.92752300 | -0.63489900 | -0.23697100 |
| C | -4.12669000 | -1.33756300 | -0.09577800 |
| C | -5.26750600 | -0.65642000 | 0.31190300  |
| N | -1.70309200 | -1.24176900 | -0.58636300 |
| C | -1.52276500 | -2.14188200 | -1.57170900 |
| N | -0.20383300 | -2.53932800 | -1.75707100 |
| S | -2.67012700 | -2.74857800 | -2.62385500 |
| C | 0.88953300  | -2.53422700 | -0.88793500 |
| C | 0.76660200  | -2.54351100 | 0.50932400  |
| C | 1.90581400  | -2.60064900 | 1.29746500  |
| C | 3.18295800  | -2.66369400 | 0.74483900  |
| C | 3.29505400  | -2.64902600 | -0.63946900 |
| C | 2.16972900  | -2.57679500 | -1.45416500 |
| O | 0.16188700  | 0.37954000  | 0.26804600  |
| C | 0.81085900  | 0.91189600  | -0.83543700 |
| C | 1.99228600  | 0.69341900  | 0.01201900  |
| C | -6.56669500 | -1.40663700 | 0.41056400  |
| F | -6.37695500 | -2.68351800 | 0.77031000  |
| F | -7.21977500 | -1.41984300 | -0.76005500 |
| F | -7.38912500 | -0.84868300 | 1.31244100  |
| C | -3.95218100 | 2.86243200  | 0.72513100  |
| F | -2.89332000 | 3.16035700  | 1.50135100  |
| F | -5.04492100 | 3.33541700  | 1.33787400  |
| F | -3.79479200 | 3.55879200  | -0.41025500 |
| C | 4.65712200  | -2.59139000 | -1.26324700 |
| F | 5.07601300  | -1.29816100 | -1.38432100 |
| F | 4.67993000  | -3.10585200 | -2.49411100 |
| F | 5.57918500  | -3.21201200 | -0.52756200 |
| C | 1.77799600  | -2.49740900 | 2.79283900  |
| F | 0.56770800  | -2.86639800 | 3.22137400  |
| F | 1.98451800  | -1.23560700 | 3.19609300  |
| F | 2.68791100  | -3.26246000 | 3.41267800  |
| C | 0.51553100  | 2.35536800  | -1.16014200 |
| C | 0.88281100  | 2.90650400  | -2.38938100 |
| C | 0.67215600  | 4.26030800  | -2.64474900 |
| C | 0.06924300  | 5.06328600  | -1.67953300 |
| C | -0.31763300 | 4.51172000  | -0.45909700 |
| C | -0.08125300 | 3.16620500  | -0.19360100 |
| H | -6.14328600 | 1.21866000  | 0.92471100  |

|   |             |             |             |
|---|-------------|-------------|-------------|
| H | -1.95289300 | 1.26431000  | -0.03950500 |
| H | -4.16670300 | -2.40054500 | -0.29661700 |
| H | -0.86181900 | -0.68837600 | -0.22736200 |
| H | -0.09369100 | -3.06278100 | -2.61523600 |
| H | -0.20995700 | -2.50319600 | 0.97603500  |
| H | 4.06116400  | -2.71753300 | 1.37815100  |
| H | 2.28182900  | -2.56191100 | -2.53415900 |
| H | 0.78220300  | 0.28547800  | -1.74574100 |
| H | 2.35141300  | -0.31967300 | 0.13526900  |
| H | 2.10117400  | 1.37545300  | 0.84820100  |
| H | 1.30520300  | 2.26672700  | -3.16363400 |
| H | 0.95694800  | 4.68188000  | -3.60358600 |
| H | -0.11456400 | 6.11275300  | -1.88517400 |
| H | -0.81324600 | 5.12610000  | 0.28584600  |
| H | -0.37339100 | 2.71699800  | 0.75122500  |
| N | 3.58719200  | 1.36219200  | -0.89599800 |
| H | 4.07519700  | 0.57413000  | -1.31639700 |
| H | 3.18421700  | 1.95250600  | -1.62278300 |
| C | 4.41372200  | 2.11392900  | -0.00683300 |
| C | 5.55050400  | 1.53542500  | 0.55117300  |
| C | 4.00707000  | 3.39631700  | 0.36153200  |
| C | 6.29742000  | 2.25939700  | 1.47530600  |
| H | 5.84382000  | 0.53144300  | 0.25779400  |
| C | 4.76421500  | 4.10905100  | 1.28418100  |
| H | 3.10211500  | 3.82088900  | -0.06970500 |
| C | 5.90922400  | 3.54489300  | 1.84267700  |
| H | 7.18721300  | 1.81453800  | 1.90807000  |
| H | 4.45430700  | 5.10841200  | 1.57058900  |
| H | 6.49471700  | 4.10480100  | 2.56357400  |

**TS1(III A)**Value of imaginary frequency = -490.1 cm<sup>-1</sup>

|   |             |             |             |
|---|-------------|-------------|-------------|
| C | 4.25875300  | 1.37398000  | 0.65224300  |
| C | 3.10781900  | 1.25951800  | 1.41894200  |
| C | 1.85868800  | 1.16905100  | 0.81892400  |
| C | 1.73969700  | 1.18356600  | -0.57092200 |
| C | 2.88631700  | 1.32594100  | -1.35723000 |
| C | 4.12502500  | 1.40727100  | -0.73283100 |
| N | 0.44173900  | 1.07341500  | -1.10194800 |
| C | 0.03365300  | 0.21710500  | -2.10082200 |
| N | -1.30539700 | 0.01939100  | -2.18675100 |
| S | 1.08078000  | -0.60175100 | -3.12677900 |
| C | -2.31035400 | 0.63009400  | -1.41164600 |
| C | -2.32307700 | 1.99950100  | -1.14453000 |
| C | -3.33095900 | 2.53974400  | -0.34389500 |
| C | -4.34173700 | 1.74856300  | 0.17192600  |
| C | -4.34608400 | 0.38954500  | -0.15074300 |
| C | -3.36136000 | -0.17524000 | -0.94042600 |
| O | -2.21912600 | -2.49841100 | -2.39637000 |
| C | -0.72809100 | -3.01494500 | -1.14250800 |
| C | -1.58899100 | -3.68567600 | -2.14198700 |
| C | 5.36222700  | 1.42675600  | -1.58598000 |
| F | 5.16304900  | 2.06552700  | -2.74272900 |
| F | 5.75140500  | 0.17362100  | -1.88611100 |
| F | 6.39006600  | 2.01446900  | -0.95983900 |
| C | 3.18811900  | 1.20188600  | 2.91757200  |
| F | 2.90332100  | 2.37980500  | 3.48438100  |
| F | 4.41158300  | 0.84071400  | 3.33330000  |
| F | 2.31450400  | 0.30757500  | 3.41468400  |
| C | -5.44567300 | -0.46553800 | 0.41418400  |
| F | -5.39894000 | -0.48391600 | 1.75996700  |
| F | -5.37557600 | -1.73433300 | -0.00458200 |
| F | -6.65514300 | 0.00731800  | 0.08212900  |
| C | -3.27863000 | 4.01383900  | -0.05759900 |
| F | -3.31521400 | 4.73345000  | -1.18731700 |
| F | -2.13656500 | 4.34087800  | 0.57100000  |
| F | -4.29392600 | 4.41493500  | 0.71527700  |
| C | -1.27595600 | -2.49915300 | 0.13249600  |
| C | -0.55141000 | -1.53442700 | 0.84304600  |
| C | -1.04542000 | -1.02017500 | 2.03979600  |
| C | -2.27785200 | -1.45043600 | 2.52402700  |
| C | -3.00334500 | -2.41288900 | 1.82241700  |
| C | -2.50267100 | -2.94114600 | 0.63885600  |
| H | 5.23630200  | 1.42701700  | 1.11736900  |

|   |             |             |             |
|---|-------------|-------------|-------------|
| H | 0.96991700  | 1.05378000  | 1.43331800  |
| H | 2.80856700  | 1.35802600  | -2.43528400 |
| H | -0.27959200 | 1.28091600  | -0.41865200 |
| H | -1.56868500 | -0.91179300 | -2.58870300 |
| H | -1.56464400 | 2.65239000  | -1.56631400 |
| H | -5.11599400 | 2.17733300  | 0.79824800  |
| H | -3.37120700 | -1.22776300 | -1.21369700 |
| H | 0.03549600  | -2.39223200 | -1.60275400 |
| H | -1.00256900 | -4.11254400 | -2.97633700 |
| H | -2.22857500 | -4.48758100 | -1.72935900 |
| H | 0.41075500  | -1.19922900 | 0.45769600  |
| H | -0.46025800 | -0.29864000 | 2.60328700  |
| H | -2.67749200 | -1.03638700 | 3.44403600  |
| H | -3.97489000 | -2.73070800 | 2.18470700  |
| H | -3.09792300 | -3.64679500 | 0.06734800  |
| N | 0.64110000  | -4.27691700 | -0.48529200 |
| H | 0.16421300  | -4.95326600 | 0.10567400  |
| H | 0.95374000  | -4.73369100 | -1.33930300 |
| C | 1.69959600  | -3.59849100 | 0.19484700  |
| C | 1.72495000  | -3.56699900 | 1.58683000  |
| C | 2.60906000  | -2.85005000 | -0.55206600 |
| C | 2.67129300  | -2.77943500 | 2.23474100  |
| H | 0.98805800  | -4.12676600 | 2.15674600  |
| C | 3.55374900  | -2.06895800 | 0.10480700  |
| H | 2.55544200  | -2.84776000 | -1.63722400 |
| C | 3.58577800  | -2.03142300 | 1.49827600  |
| H | 2.68388900  | -2.73908800 | 3.31864800  |
| H | 4.25343900  | -1.47812500 | -0.47852400 |
| H | 4.31467200  | -1.41167300 | 2.01053900  |

**TS1(IIIB)**Value of imaginary frequency = -598.7 cm<sup>-1</sup>

|   |             |             |             |
|---|-------------|-------------|-------------|
| C | 5.02118900  | -2.85154500 | 0.66148500  |
| C | 4.76690600  | -1.71692200 | 1.41734600  |
| C | 3.71665400  | -0.86466700 | 1.09638600  |
| C | 2.90311600  | -1.13500500 | -0.00371500 |
| C | 3.16145600  | -2.26283800 | -0.78906700 |
| C | 4.20631800  | -3.10706700 | -0.43785300 |
| N | 1.90396700  | -0.19335200 | -0.31221300 |
| C | 0.61785400  | -0.40806500 | -0.74136200 |
| N | -0.13935200 | 0.69934900  | -0.88753100 |
| S | -0.01835100 | -1.94498700 | -1.01874800 |
| C | 0.25660600  | 2.04421700  | -0.80240600 |
| C | 1.46314000  | 2.53402600  | -1.30984200 |
| C | 1.75379200  | 3.89463000  | -1.21165700 |
| C | 0.85640500  | 4.78710700  | -0.65008600 |
| C | -0.36404100 | 4.29351300  | -0.18650400 |
| C | -0.67100500 | 2.94633000  | -0.25171300 |
| O | -2.70679700 | 0.64818300  | -0.62628300 |
| C | -2.93248100 | -0.36077500 | 0.29996400  |
| C | -3.42721300 | -1.08899400 | -0.88036600 |
| C | 4.44060500  | -4.35220000 | -1.24895900 |
| F | 4.07947600  | -4.18749800 | -2.52783800 |
| F | 3.73631900  | -5.38722900 | -0.76937400 |
| F | 5.73155800  | -4.71340200 | -1.23123800 |
| C | 5.59347800  | -1.41053700 | 2.63458700  |
| F | 5.87390300  | -0.10142200 | 2.71767300  |
| F | 6.75297700  | -2.07848500 | 2.62955100  |
| F | 4.94644600  | -1.73991200 | 3.76266300  |
| C | -1.33515900 | 5.26162200  | 0.43191500  |
| F | -0.91661700 | 5.66043300  | 1.64339500  |
| F | -2.55182900 | 4.72852600  | 0.58272500  |
| F | -1.46106500 | 6.36637200  | -0.31746400 |
| C | 3.08957900  | 4.36915300  | -1.71289300 |
| F | 3.36166800  | 3.87568000  | -2.92893600 |
| F | 4.07982800  | 3.96512800  | -0.90079000 |
| F | 3.15193600  | 5.70297000  | -1.78852000 |
| C | -3.97669400 | -0.11197900 | 1.35566700  |
| C | -4.01428500 | -0.90227300 | 2.50628800  |
| C | -5.06291300 | -0.77624800 | 3.41608700  |
| C | -6.07257600 | 0.15438400  | 3.18331900  |
| C | -6.02256200 | 0.96515700  | 2.04867200  |
| C | -4.97975700 | 0.83280400  | 1.13691500  |
| H | 5.84455300  | -3.51088800 | 0.90894600  |

|   |             |             |             |
|---|-------------|-------------|-------------|
| H | 3.53320500  | 0.01489000  | 1.70759400  |
| H | 2.55632200  | -2.47225600 | -1.66071700 |
| H | 2.07628100  | 0.72533700  | 0.07891100  |
| H | -1.21837700 | 0.57699400  | -0.90844700 |
| H | 2.16237300  | 1.87205600  | -1.81063400 |
| H | 1.08845800  | 5.84430900  | -0.59152900 |
| H | -1.63113600 | 2.56674000  | 0.08645800  |
| H | -2.02160000 | -0.80085500 | 0.73778900  |
| H | -2.67284900 | -1.45800500 | -1.56554900 |
| H | -4.38251400 | -0.75372100 | -1.26879700 |
| H | -3.20793700 | -1.60885800 | 2.69930200  |
| H | -5.08489100 | -1.39341600 | 4.30871800  |
| H | -6.88749500 | 0.25971700  | 3.89217900  |
| H | -6.79978600 | 1.70353500  | 1.87796000  |
| H | -4.91724600 | 1.45200200  | 0.24671300  |
| N | -4.10883600 | -2.82929200 | -0.32822000 |
| H | -3.49954800 | -3.54941200 | -0.70889100 |
| H | -3.98831000 | -2.79112600 | 0.68270000  |
| C | -5.48178900 | -3.01050300 | -0.68397900 |
| C | -5.81513400 | -3.69620100 | -1.84939400 |
| C | -6.46925400 | -2.41184000 | 0.09903800  |
| C | -7.15098300 | -3.80074800 | -2.22338000 |
| H | -5.03520500 | -4.14698600 | -2.45713300 |
| C | -7.80047000 | -2.52616300 | -0.28588500 |
| H | -6.19553500 | -1.86294500 | 0.99760400  |
| C | -8.14653800 | -3.21863300 | -1.44404000 |
| H | -7.41125300 | -4.34121000 | -3.12724900 |
| H | -8.56990700 | -2.06526000 | 0.32464800  |
| H | -9.18690200 | -3.30215000 | -1.73864300 |



**TS1(IVA)**Value of imaginary frequency = -591.9 cm<sup>-1</sup>

|   |             |             |             |
|---|-------------|-------------|-------------|
| C | -3.81435400 | 0.49108000  | 0.28458100  |
| C | -3.66827400 | -0.87045300 | 0.03313200  |
| C | -2.77206600 | -1.63815500 | 0.76165900  |
| C | -1.99778700 | -1.04431400 | 1.75982300  |
| C | -2.18107700 | 0.30442000  | 2.06528500  |
| C | -3.07015800 | 1.06232400  | 1.31017400  |
| N | -0.98665100 | -1.80712400 | 2.37303500  |
| C | 0.31636900  | -1.43666300 | 2.65976100  |
| N | 0.86913100  | -0.35285900 | 2.11592100  |
| S | 1.16424600  | -2.43818600 | 3.74519400  |
| C | 0.46597100  | 0.27154100  | 0.93578000  |
| C | -0.01440500 | -0.42173700 | -0.18928000 |
| C | -0.41262700 | 0.28054000  | -1.32058500 |
| C | -0.27480300 | 1.66319200  | -1.40505300 |
| C | 0.28902700  | 2.33111800  | -0.32452000 |
| C | 0.65825700  | 1.65657700  | 0.83067300  |
| O | 3.25127300  | 0.34410700  | 2.33375000  |
| C | 3.57511100  | -0.61378200 | 0.71057100  |
| C | 4.01778500  | -0.82118800 | 2.09418300  |
| C | -3.17101700 | 2.54099900  | 1.57170500  |
| F | -2.22402100 | 3.22615600  | 0.90907500  |
| F | -3.01924900 | 2.82115200  | 2.87191200  |
| F | -4.35464400 | 3.03094700  | 1.18044900  |
| C | -4.44798500 | -1.48132200 | -1.09778100 |
| F | -4.28979000 | -0.77407200 | -2.22506600 |
| F | -5.76281600 | -1.50560100 | -0.83473600 |
| F | -4.06522600 | -2.74070700 | -1.34889100 |
| C | 0.51093600  | 3.81364800  | -0.42367400 |
| F | -0.44404900 | 4.40541100  | -1.15451200 |
| F | 1.68469200  | 4.08935800  | -1.02040500 |
| F | 0.52994100  | 4.39975700  | 0.77767700  |
| C | -0.95526800 | -0.46466800 | -2.50557800 |
| F | -1.58947100 | -1.59418800 | -2.14893900 |
| F | 0.03047900  | -0.82385700 | -3.35402500 |
| F | -1.81841200 | 0.27659700  | -3.20827300 |
| C | 4.14060400  | 0.36362200  | -0.22495100 |
| C | 3.33715500  | 0.77588200  | -1.29564600 |
| C | 3.81002600  | 1.72052400  | -2.19860800 |
| C | 5.08985400  | 2.24751500  | -2.04204200 |
| C | 5.89740000  | 1.83194000  | -0.98335800 |
| C | 5.42593800  | 0.89351300  | -0.07439100 |
| H | -4.49119100 | 1.09561400  | -0.30929800 |

|   |             |             |             |
|---|-------------|-------------|-------------|
| H | -2.60752500 | -2.67954800 | 0.50461000  |
| H | -1.59083600 | 0.76495900  | 2.85119500  |
| H | -1.23774800 | -2.70534300 | 2.76268400  |
| H | 2.19088000  | 0.03562000  | 2.42633000  |
| H | -0.11590200 | -1.50284600 | -0.15128400 |
| H | -0.61084400 | 2.20574500  | -2.28109100 |
| H | 1.06515800  | 2.19763400  | 1.67895900  |
| H | 2.54586300  | -0.90116300 | 0.53778700  |
| H | 3.61631900  | -1.71250500 | 2.58658700  |
| H | 5.07514200  | -0.66267100 | 2.31203300  |
| H | 2.33649600  | 0.36168500  | -1.40543300 |
| H | 3.17458000  | 2.05491200  | -3.01166800 |
| H | 5.45876400  | 2.99016900  | -2.74198500 |
| H | 6.89087200  | 2.25035300  | -0.86213100 |
| H | 6.04709400  | 0.58892600  | 0.76197000  |
| N | 3.97640000  | -2.45902400 | -0.35974700 |
| H | 4.48087100  | -2.24614000 | -1.21508700 |
| H | 4.55419800  | -3.03390400 | 0.24653900  |
| C | 2.69217600  | -3.02993200 | -0.59063800 |
| C | 2.07435600  | -2.91415100 | -1.83651300 |
| C | 2.00616300  | -3.59686000 | 0.48409700  |
| C | 0.78826500  | -3.41574700 | -2.01395600 |
| H | 2.59606400  | -2.43958500 | -2.66375700 |
| C | 0.71520700  | -4.08239700 | 0.29906900  |
| H | 2.45558000  | -3.63541600 | 1.47318100  |
| C | 0.10470100  | -4.00361800 | -0.95138700 |
| H | 0.31161600  | -3.32214500 | -2.98273500 |
| H | 0.19673000  | -4.51188000 | 1.15095300  |
| H | -0.90226000 | -4.38055400 | -1.09951800 |

**TS1(IVB)**Value of imaginary frequency = -602.7 cm<sup>-1</sup>

|   |             |             |             |
|---|-------------|-------------|-------------|
| C | -4.25683200 | 0.15356600  | -1.47144500 |
| C | -4.44934700 | -1.20283800 | -1.25573600 |
| C | -3.36796600 | -2.07367200 | -1.14964900 |
| C | -2.07147900 | -1.58545400 | -1.29125100 |
| C | -1.86949300 | -0.23556600 | -1.59551600 |
| C | -2.95548500 | 0.62363100  | -1.64000500 |
| N | -0.98162600 | -2.44500400 | -1.03885100 |
| C | 0.23675800  | -2.14336700 | -0.46774900 |
| N | 0.35282400  | -1.09103600 | 0.36096700  |
| S | 1.54023500  | -3.15664500 | -0.84776100 |
| C | -0.68491900 | -0.37028900 | 0.97762000  |
| C | -1.84273900 | -0.99312200 | 1.45323800  |
| C | -2.90809000 | -0.21823800 | 1.88188700  |
| C | -2.82058600 | 1.17231700  | 1.92146900  |
| C | -1.62622100 | 1.77105400  | 1.54474800  |
| C | -0.55618700 | 1.01569800  | 1.07348300  |
| O | 2.53736400  | 0.18467700  | 0.74618100  |
| C | 3.30229800  | -0.05871600 | -0.38882700 |
| C | 3.96284700  | -1.03763800 | 0.49047200  |
| C | -2.74371800 | 2.10349700  | -1.81472500 |
| F | -1.44804200 | 2.41728500  | -1.91232500 |
| F | -3.24986600 | 2.78361000  | -0.77197100 |
| F | -3.36123300 | 2.56383600  | -2.91114600 |
| C | -5.83895900 | -1.75444800 | -1.08709400 |
| F | -6.24645200 | -2.38635100 | -2.19910900 |
| F | -6.72809300 | -0.79097300 | -0.82555600 |
| F | -5.89183500 | -2.64763400 | -0.09069900 |
| C | -1.47861000 | 3.26667400  | 1.60085700  |
| F | -2.66075800 | 3.87962000  | 1.74214700  |
| F | -0.90092000 | 3.74171700  | 0.48928000  |
| F | -0.70702600 | 3.64340200  | 2.63183300  |
| C | -4.20641600 | -0.87344200 | 2.26179900  |
| F | -4.17924000 | -2.19699000 | 2.05429400  |
| F | -5.22516200 | -0.37474100 | 1.53902400  |
| F | -4.51367900 | -0.67001000 | 3.54929500  |
| C | 4.20345200  | 1.04851000  | -0.86512300 |
| C | 4.68527300  | 1.04978700  | -2.17500200 |
| C | 5.64021800  | 1.98359200  | -2.57508600 |
| C | 6.10879800  | 2.92779100  | -1.66480600 |
| C | 5.60804000  | 2.94583600  | -0.36227000 |
| C | 4.65830100  | 2.01149100  | 0.03656700  |
| H | -5.10013000 | 0.83499600  | -1.48416800 |

|   |             |             |             |
|---|-------------|-------------|-------------|
| H | -3.53234800 | -3.11404500 | -0.88474200 |
| H | -0.86329600 | 0.14823000  | -1.71971200 |
| H | -0.98351400 | -3.34842700 | -1.49328100 |
| H | 1.34383100  | -0.65926100 | 0.55678000  |
| H | -1.93188000 | -2.07253100 | 1.41531100  |
| H | -3.66888700 | 1.77547900  | 2.22475000  |
| H | 0.36433100  | 1.48486200  | 0.73533900  |
| H | 2.75448300  | -0.51765300 | -1.22800900 |
| H | 3.41032800  | -1.94625600 | 0.70014100  |
| H | 4.61550700  | -0.62009500 | 1.24937300  |
| H | 4.29979200  | 0.32407100  | -2.88971000 |
| H | 6.00986900  | 1.97960800  | -3.59565700 |
| H | 6.85030300  | 3.65779800  | -1.97346300 |
| H | 5.96119000  | 3.69278000  | 0.34188100  |
| H | 4.24880500  | 2.00676900  | 1.04266200  |
| N | 5.41473600  | -1.90816800 | -0.48103300 |
| H | 5.17023400  | -2.89066100 | -0.58048400 |
| H | 5.36583100  | -1.45955800 | -1.39398200 |
| C | 6.68312200  | -1.69908900 | 0.14304400  |
| C | 7.19230200  | -2.64947600 | 1.02509200  |
| C | 7.35101800  | -0.49251400 | -0.06733000 |
| C | 8.39026900  | -2.39693400 | 1.68626900  |
| H | 6.65613800  | -3.57980100 | 1.19187700  |
| C | 8.54810000  | -0.25443900 | 0.59849900  |
| H | 6.93589700  | 0.25054700  | -0.74452600 |
| C | 9.07224900  | -1.20211800 | 1.47468100  |
| H | 8.78932400  | -3.13921500 | 2.36945100  |
| H | 9.06897900  | 0.68250400  | 0.43122500  |
| H | 10.00574100 | -1.00922900 | 1.99182900  |

**TS1(VA)**Value of imaginary frequency = -529.7 cm<sup>-1</sup>

|   |             |             |             |
|---|-------------|-------------|-------------|
| C | -5.57160100 | -3.77164700 | -0.31189800 |
| N | -5.94358100 | -2.50162700 | -0.08847800 |
| C | -5.05509800 | -1.49522700 | 0.05113900  |
| C | -3.68589800 | -1.74714500 | -0.04653900 |
| C | -3.28411400 | -3.07837800 | -0.26654500 |
| C | -4.22370100 | -4.08360000 | -0.39681400 |
| C | -7.38119600 | -2.15624000 | 0.00242300  |
| C | -2.71655900 | 0.55396200  | -0.03439800 |
| S | -4.06996000 | 1.45797900  | -0.38537100 |
| C | -1.01490700 | 2.36601300  | -0.06415700 |
| C | -1.79138100 | 3.49081700  | 0.21463400  |
| N | -1.30197300 | 4.72827100  | 0.00097400  |
| C | -0.05486000 | 4.93994900  | -0.45605900 |
| C | 0.77337400  | 3.86043400  | -0.70457400 |
| C | 0.29855400  | 2.57280800  | -0.51409300 |
| C | -2.19431500 | 5.87545600  | 0.28417400  |
| O | -0.09315900 | -1.32037900 | 0.24390200  |
| C | 1.74399000  | -1.61336500 | 0.37979900  |
| C | 0.63132900  | -1.92280100 | 1.28048700  |
| C | 2.36819900  | -0.28200200 | 0.30041900  |
| C | 3.02149600  | 0.08771200  | -0.88038700 |
| C | 3.69663600  | 1.30423000  | -0.96034800 |
| C | 3.73171600  | 2.15209500  | 0.14497600  |
| C | 3.07954600  | 1.79091800  | 1.32560300  |
| C | 2.40089500  | 0.57968100  | 1.40462600  |
| H | -6.36017500 | -4.50540500 | -0.41901300 |
| H | -5.46015300 | -0.51026900 | 0.23084600  |
| H | -2.22227800 | -3.29624000 | -0.34515900 |
| H | -3.92778600 | -5.10995100 | -0.57547000 |
| H | -1.71446600 | -1.21303800 | 0.17710600  |
| H | -7.56228900 | -1.65612200 | 0.95353200  |
| H | -7.63741700 | -1.49851500 | -0.82828600 |
| H | -7.96956100 | -3.06947800 | -0.05052300 |
| H | -0.69687800 | 0.34565900  | 0.21112800  |
| H | -2.79858300 | 3.42788000  | 0.59955800  |
| H | 0.24279700  | 5.96932400  | -0.61058500 |
| H | 1.78052000  | 4.02931300  | -1.06528000 |
| H | 0.93391400  | 1.71761000  | -0.73293100 |
| H | -3.07425400 | 5.80216500  | -0.35497300 |
| H | -2.48428500 | 5.84652500  | 1.33448000  |
| H | -1.66077300 | 6.79989000  | 0.07492300  |
| H | 1.84515500  | -2.26176100 | -0.48291700 |

|   |             |             |             |
|---|-------------|-------------|-------------|
| H | 0.43143000  | -2.99043400 | 1.42503100  |
| H | 0.61116000  | -1.40190700 | 2.24411800  |
| H | 3.02322300  | -0.59056000 | -1.72872400 |
| H | 4.21878100  | 1.57150900  | -1.87298600 |
| H | 4.28425000  | 3.08553000  | 0.09612700  |
| H | 3.11573300  | 2.44607200  | 2.18978900  |
| H | 1.91513500  | 0.29980300  | 2.33495000  |
| N | -2.68106100 | -0.80958600 | 0.09500400  |
| N | -1.44658400 | 1.06047800  | 0.12132100  |
| N | 3.50016700  | -2.60138900 | 1.20618100  |
| H | 3.58889000  | -2.31165600 | 2.17718200  |
| H | 3.31023300  | -3.60079200 | 1.18449600  |
| C | 4.65880400  | -2.26159800 | 0.44586200  |
| C | 5.48755700  | -1.22291700 | 0.86584500  |
| C | 4.89026200  | -2.90268700 | -0.77103600 |
| C | 6.55392300  | -0.82934600 | 0.06425500  |
| H | 5.29705100  | -0.72369700 | 1.81257400  |
| C | 5.96233000  | -2.50437900 | -1.56367400 |
| H | 4.24577600  | -3.71874600 | -1.08927400 |
| C | 6.79361700  | -1.46530900 | -1.15149800 |
| H | 7.20466800  | -0.02778900 | 0.39728700  |
| H | 6.15197100  | -3.01396600 | -2.50227900 |
| H | 7.63248300  | -1.16321200 | -1.76834100 |

**TS1(VB)**Value of imaginary frequency = -580.7 cm<sup>-1</sup>

|   |             |             |             |
|---|-------------|-------------|-------------|
| C | 4.04009400  | -4.81363000 | -0.00236200 |
| N | 4.74205800  | -3.68698000 | 0.18882300  |
| C | 4.17781000  | -2.45983700 | 0.16404700  |
| C | 2.81089300  | -2.31954400 | -0.08342700 |
| C | 2.06206700  | -3.49909500 | -0.26709700 |
| C | 2.67376700  | -4.73654000 | -0.22677100 |
| C | 6.20049100  | -3.75641900 | 0.43963500  |
| C | 2.54425900  | 0.15464000  | -0.31052600 |
| S | 4.13616300  | 0.64221900  | -0.30092400 |
| C | 1.40329900  | 2.36534400  | -0.62451100 |
| C | 2.46395600  | 3.18002000  | -1.02016500 |
| N | 2.29222700  | 4.51404800  | -1.13827500 |
| C | 1.11626300  | 5.11653500  | -0.90171000 |
| C | 0.02183700  | 4.35166000  | -0.53384600 |
| C | 0.15988900  | 2.98284900  | -0.39610800 |
| C | 3.46836200  | 5.31592000  | -1.54694500 |
| O | -0.51453000 | -0.98550700 | -0.19654500 |
| C | -1.27505400 | -0.91462300 | 0.99570400  |
| C | -2.19549600 | -1.55895600 | 0.06290900  |
| C | -1.55225700 | 0.47582700  | 1.49738600  |
| C | -0.63007700 | 1.05795600  | 2.37309200  |
| C | -0.80136300 | 2.36545900  | 2.81761100  |
| C | -1.90714800 | 3.10406900  | 2.39614300  |
| C | -2.83181900 | 2.53302000  | 1.52370400  |
| C | -2.65227800 | 1.22539300  | 1.07014500  |
| H | 4.58709500  | -5.74731000 | 0.02924400  |
| H | 4.83250800  | -1.61927300 | 0.34034800  |
| H | 0.99532700  | -3.41178000 | -0.45549500 |
| H | 2.10998200  | -5.64861800 | -0.37867300 |
| H | 1.05484000  | -1.25227500 | -0.15341000 |
| H | 6.41309000  | -3.29120500 | 1.40204800  |
| H | 6.50843800  | -4.79937600 | 0.45754600  |
| H | 6.71964400  | -3.22901100 | -0.36045200 |
| H | 0.54167700  | 0.51931400  | -0.44103700 |
| H | 3.44769800  | 2.79628400  | -1.24536500 |
| H | 1.08195200  | 6.19243900  | -1.01680200 |
| H | -0.93027900 | 4.83345200  | -0.34815100 |
| H | -0.69346500 | 2.37685700  | -0.10329200 |
| H | 3.17373000  | 6.35931000  | -1.63420700 |
| H | 4.24540300  | 5.21068800  | -0.78989200 |
| H | 3.82535700  | 4.95117000  | -2.50987700 |
| H | -0.89409500 | -1.55775500 | 1.79915000  |

|   |             |             |             |
|---|-------------|-------------|-------------|
| H | -2.07172500 | -2.61519400 | -0.13213400 |
| H | -2.69113700 | -0.95895800 | -0.68928800 |
| H | 0.22337600  | 0.47618900  | 2.71460900  |
| H | -0.08616200 | 2.80110100  | 3.50747600  |
| H | -2.05707000 | 4.11437600  | 2.76289400  |
| H | -3.70121600 | 3.09930800  | 1.20488200  |
| H | -3.38186000 | 0.79604300  | 0.38747100  |
| N | 2.10615100  | -1.13264700 | -0.14268400 |
| N | 1.46151700  | 0.98769100  | -0.47730100 |
| N | -4.02556700 | -1.88818600 | 0.97788900  |
| H | -4.03774900 | -2.83092200 | 1.36219400  |
| H | -4.11139000 | -1.23368900 | 1.75351900  |
| C | -5.07100900 | -1.70041900 | 0.01331200  |
| C | -5.24394600 | -2.65667500 | -0.98660900 |
| C | -5.84877100 | -0.54450200 | 0.02967300  |
| C | -6.21188300 | -2.45808900 | -1.96487800 |
| H | -4.63660600 | -3.55821500 | -0.98952000 |
| C | -6.81119300 | -0.35216600 | -0.95901300 |
| H | -5.72505300 | 0.18589700  | 0.82590500  |
| C | -6.99458900 | -1.30520600 | -1.95624200 |
| H | -6.35700200 | -3.20893200 | -2.73386100 |
| H | -7.42802500 | 0.53965500  | -0.93839400 |
| H | -7.75097500 | -1.15644700 | -2.71836500 |



**TS1(VIA)**Value of imaginary frequency = -532.1 cm<sup>-1</sup>

|   |             |             |             |
|---|-------------|-------------|-------------|
| C | -6.09449300 | -3.16887400 | 0.03183900  |
| N | -4.91887000 | -3.49051200 | -0.53460900 |
| C | -3.86473200 | -2.65008600 | -0.49344200 |
| C | -3.94602600 | -1.42331300 | 0.15506400  |
| C | -5.16167900 | -1.08491600 | 0.77504800  |
| C | -6.23243500 | -1.96142000 | 0.69621400  |
| C | -4.75590800 | -4.79172400 | -1.22008400 |
| C | -2.75581600 | 0.72873000  | 0.04517300  |
| S | -4.08421400 | 1.68233000  | -0.26272700 |
| C | -0.96623600 | 2.43380600  | -0.13094400 |
| C | -1.67434600 | 3.60610700  | 0.13576200  |
| N | -1.14024500 | 4.80826400  | -0.15660800 |
| C | 0.09022000  | 4.94004500  | -0.68414300 |
| C | 0.85444000  | 3.81243900  | -0.92228100 |
| C | 0.33159200  | 2.55834000  | -0.64996500 |
| C | -1.96568000 | 6.00730700  | 0.11373600  |
| O | -0.20943000 | -1.25316000 | 0.15387300  |
| C | 1.61940000  | -1.60086100 | 0.34716700  |
| C | 0.46789100  | -1.88013900 | 1.20726100  |
| C | 2.28372100  | -0.28859400 | 0.29136700  |
| C | 3.00630200  | 0.05309700  | -0.85742500 |
| C | 3.71427400  | 1.25202600  | -0.91315300 |
| C | 3.71187000  | 2.11056500  | 0.18422800  |
| C | 2.99073100  | 1.77757600  | 1.33266600  |
| C | 2.27987600  | 0.58376400  | 1.38775100  |
| H | -6.89375100 | -3.89420000 | -0.05532800 |
| H | -2.95897700 | -2.97662800 | -0.99322500 |
| H | -5.25037700 | -0.15151900 | 1.31456400  |
| H | -7.18055200 | -1.72402800 | 1.16313100  |
| H | -1.87606400 | -1.12167000 | 0.15868000  |
| H | -4.30411600 | -4.62280400 | -2.19695600 |
| H | -4.12134100 | -5.43669600 | -0.61163900 |
| H | -5.73473900 | -5.24875600 | -1.34773100 |
| H | -0.74401800 | 0.39881800  | 0.18746700  |
| H | -2.66350300 | 3.60683000  | 0.57000800  |
| H | 0.42624800  | 5.94636500  | -0.89965100 |
| H | 1.84906500  | 3.91812900  | -1.33746400 |
| H | 0.91695800  | 1.66537900  | -0.85639100 |
| H | -2.86481300 | 5.96070300  | -0.50087100 |
| H | -2.22977900 | 6.02280300  | 1.17101900  |
| H | -1.39163600 | 6.89686800  | -0.13536200 |
| H | 1.73003900  | -2.24950500 | -0.51436100 |

|   |             |             |             |
|---|-------------|-------------|-------------|
| H | 0.23457800  | -2.94270700 | 1.33989800  |
| H | 0.43381000  | -1.36496200 | 2.17405700  |
| H | 3.03497300  | -0.63364400 | -1.69847600 |
| H | 4.28894700  | 1.49778700  | -1.79993700 |
| H | 4.28643200  | 3.03127000  | 0.15482700  |
| H | 2.99738500  | 2.44145600  | 2.19082400  |
| H | 1.73683400  | 0.32710000  | 2.29268900  |
| N | -2.80262300 | -0.63747600 | 0.19477000  |
| N | -1.45470300 | 1.16106700  | 0.12637800  |
| N | 3.31365400  | -2.64060900 | 1.23515800  |
| H | 3.37444500  | -2.34787500 | 2.20742700  |
| H | 3.09253900  | -3.63347700 | 1.21108600  |
| C | 4.51025600  | -2.34241000 | 0.51744300  |
| C | 5.35489600  | -1.32695300 | 0.96170000  |
| C | 4.76643300  | -2.99919300 | -0.68609100 |
| C | 6.46250700  | -0.97294400 | 0.19811600  |
| H | 5.14451300  | -0.81388400 | 1.89676900  |
| C | 5.87871200  | -2.63971200 | -1.44102100 |
| H | 4.10838700  | -3.79657500 | -1.02333500 |
| C | 6.72636400  | -1.62410100 | -1.00435500 |
| H | 7.12539300  | -0.18982800 | 0.55043700  |
| H | 6.08678900  | -3.16142700 | -2.36898700 |
| H | 7.59589400  | -1.35183600 | -1.59191700 |

**TS1(VIB)**Value of imaginary frequency = -582.3 cm<sup>-1</sup>

|   |             |             |             |
|---|-------------|-------------|-------------|
| C | -4.44409200 | 4.60154500  | 0.39522800  |
| N | -3.31986900 | 4.55812600  | -0.34441300 |
| C | -2.60437600 | 3.42292300  | -0.46533700 |
| C | -2.98795700 | 2.25450400  | 0.18455700  |
| C | -4.14291900 | 2.29291400  | 0.98285100  |
| C | -4.87081800 | 3.47225000  | 1.06960500  |
| C | -2.85137100 | 5.78619100  | -1.02428700 |
| C | -2.61961200 | -0.14132300 | -0.21095200 |
| S | -4.22498900 | -0.58070700 | -0.24114700 |
| C | -1.51126000 | -2.34203700 | -0.65648600 |
| C | -2.59825000 | -3.12990500 | -1.03591700 |
| N | -2.44403700 | -4.45688200 | -1.23125300 |
| C | -1.26269900 | -5.07783100 | -1.08822600 |
| C | -0.14492800 | -4.33975100 | -0.73587000 |
| C | -0.26378600 | -2.97908700 | -0.52075200 |
| C | -3.64518000 | -5.22764600 | -1.62636700 |
| O | 0.44481000  | 0.93453100  | -0.14878300 |
| C | 1.21303300  | 0.80597100  | 1.03246500  |
| C | 2.14002700  | 1.48079000  | 0.12783900  |
| C | 1.48142400  | -0.60730100 | 1.47317000  |
| C | 0.55733500  | -1.22112400 | 2.32464800  |
| C | 0.71861800  | -2.54922900 | 2.70755700  |
| C | 1.81608400  | -3.27720800 | 2.24796000  |
| C | 2.74304300  | -2.67434700 | 1.40002400  |
| C | 2.57339200  | -1.34574100 | 1.00812600  |
| H | -4.96604000 | 5.55021900  | 0.43213100  |
| H | -1.72462600 | 3.46074300  | -1.09777900 |
| H | -4.45157700 | 1.41230900  | 1.52983600  |
| H | -5.76822700 | 3.52692800  | 1.67370800  |
| H | -1.13231400 | 1.28883400  | -0.04365800 |
| H | -2.29365000 | 5.50648000  | -1.91607300 |
| H | -3.71666800 | 6.38028200  | -1.31256600 |
| H | -2.21671500 | 6.35272700  | -0.34161400 |
| H | -0.62541800 | -0.51292800 | -0.38940800 |
| H | -3.58883200 | -2.72690500 | -1.18529800 |
| H | -1.24340000 | -6.14615400 | -1.26215100 |
| H | 0.81060600  | -4.83656000 | -0.62131900 |
| H | 0.60792000  | -2.39556800 | -0.23610600 |
| H | -3.37758900 | -6.27758200 | -1.72223700 |
| H | -4.40805000 | -5.10790800 | -0.85741800 |
| H | -4.00812500 | -4.84886600 | -2.58179200 |
| H | 0.84383500  | 1.41640600  | 1.86650000  |

|   |             |             |             |
|---|-------------|-------------|-------------|
| H | 2.02014800  | 2.54467100  | -0.02305200 |
| H | 2.62101500  | 0.90885600  | -0.65506000 |
| H | -0.29056000 | -0.64854700 | 2.69462700  |
| H | 0.00137400  | -3.01041600 | 3.37851800  |
| H | 1.95753900  | -4.30533500 | 2.56524800  |
| H | 3.60604100  | -3.23295800 | 1.05144100  |
| H | 3.30338000  | -0.89233000 | 0.34163900  |
| N | -2.17462900 | 1.13672600  | 0.02965900  |
| N | -1.55052900 | -0.97501900 | -0.43026400 |
| N | 3.96943200  | 1.74609800  | 1.04509500  |
| H | 4.00191600  | 2.67907300  | 1.45160900  |
| H | 4.03482400  | 1.07167100  | 1.80560700  |
| C | 5.01727700  | 1.55551100  | 0.08289500  |
| C | 5.20309800  | 2.51876300  | -0.90794000 |
| C | 5.78515600  | 0.39297600  | 0.09330500  |
| C | 6.17400500  | 2.32034400  | -1.88329800 |
| H | 4.60269100  | 3.42491400  | -0.90598000 |
| C | 6.75049900  | 0.20079100  | -0.89261000 |
| H | 5.65065400  | -0.34361500 | 0.88199300  |
| C | 6.94672200  | 1.16071000  | -1.88076500 |
| H | 6.32904500  | 3.07607600  | -2.64553900 |
| H | 7.35954300  | -0.69646000 | -0.87675000 |
| H | 7.70523800  | 1.01175200  | -2.64074600 |

**TS1(VIIA)**Value of imaginary frequency = -524.7 cm<sup>-1</sup>

|   |             |             |             |
|---|-------------|-------------|-------------|
| C | 6.45314100  | -2.71950500 | 0.49719000  |
| N | 6.46127400  | -1.50573800 | -0.07631100 |
| C | 5.34337400  | -0.76763100 | -0.23591400 |
| C | 4.11281500  | -1.24718900 | 0.21598500  |
| C | 4.08948800  | -2.52599800 | 0.80110800  |
| C | 5.25486000  | -3.25724500 | 0.93866100  |
| C | 7.73613300  | -0.92122700 | -0.55391000 |
| C | 2.64887500  | 0.76917200  | -0.04842600 |
| S | 3.79377300  | 1.96549900  | -0.18692900 |
| C | 0.67270400  | 2.21603300  | 0.04838100  |
| C | -0.36359700 | 2.36075200  | 0.96817700  |
| N | -1.04484600 | 3.51385300  | 1.06884300  |
| C | -0.75325300 | 4.57330100  | 0.28773600  |
| C | 0.26187800  | 4.48487500  | -0.64461100 |
| C | 0.98198700  | 3.30298100  | -0.77848700 |
| C | -2.10108300 | 3.65775600  | 2.09263000  |
| O | 0.26594800  | -1.38788200 | 0.44351800  |
| C | -1.49284900 | -1.67340900 | -0.11899600 |
| C | -0.20785500 | -2.09654800 | -0.67254800 |
| C | -2.07662000 | -0.33931700 | -0.35472100 |
| C | -3.06239600 | 0.12857000  | 0.52242500  |
| C | -3.69185900 | 1.34948500  | 0.28752300  |
| C | -3.33706300 | 2.11488600  | -0.82169500 |
| C | -2.35404900 | 1.65573200  | -1.70047000 |
| C | -1.73296500 | 0.43206800  | -1.47368400 |
| H | 7.40449900  | -3.22780700 | 0.58909700  |
| H | 5.45716100  | 0.19565300  | -0.71113400 |
| H | 3.14515000  | -2.92776400 | 1.15847600  |
| H | 5.25018400  | -4.23852300 | 1.39705200  |
| H | 2.07547300  | -1.14178500 | 0.32969500  |
| H | 7.63300900  | -0.66910200 | -1.60907400 |
| H | 7.95376200  | -0.02726000 | 0.03073400  |
| H | 8.53068700  | -1.65285400 | -0.42614600 |
| H | 0.70389400  | 0.10774900  | 0.17891400  |
| H | -0.65479400 | 1.55174400  | 1.62891900  |
| H | -1.34541900 | 5.46730700  | 0.44478100  |
| H | 0.48002100  | 5.34204000  | -1.26996100 |
| H | 1.76725000  | 3.21272700  | -1.51744700 |
| H | -2.33323300 | 2.67610500  | 2.50002100  |
| H | -1.73954000 | 4.31904400  | 2.88105000  |
| H | -2.99122300 | 4.07603500  | 1.62298500  |
| H | -1.82783700 | -2.21438700 | 0.75897900  |

|   |             |             |             |
|---|-------------|-------------|-------------|
| H | -0.01541600 | -3.17392000 | -0.64222100 |
| H | 0.07188700  | -1.68727300 | -1.65081200 |
| H | -3.36627000 | -0.48699800 | 1.36546100  |
| H | -4.48394000 | 1.68121200  | 0.95206300  |
| H | -3.84480000 | 3.05423700  | -1.02111000 |
| H | -2.09047900 | 2.24021600  | -2.57606700 |
| H | -0.98374100 | 0.07862200  | -2.17618200 |
| N | 2.90764200  | -0.57897400 | 0.09866800  |
| N | 1.29561900  | 0.97439600  | -0.01189400 |
| N | -3.03138900 | -2.76471000 | -1.20793000 |
| H | -3.03800400 | -2.45082300 | -2.17543700 |
| H | -2.75197200 | -3.74299800 | -1.18598900 |
| C | -4.28950500 | -2.55515400 | -0.57068200 |
| C | -5.16660100 | -1.58752500 | -1.05748800 |
| C | -4.58329500 | -3.24798700 | 0.60452900  |
| C | -6.34701400 | -1.32255700 | -0.36996400 |
| H | -4.92391600 | -1.04307400 | -1.96699500 |
| C | -5.76588300 | -2.97524000 | 1.28479400  |
| H | -3.90000800 | -4.00857700 | 0.97485200  |
| C | -6.64876200 | -2.01098700 | 0.80216000  |
| H | -7.03613200 | -0.58031400 | -0.75854700 |
| H | -6.00211100 | -3.52605800 | 2.18879400  |
| H | -7.57381200 | -1.80845200 | 1.33011300  |

**TS1(VIIB)**Value of imaginary frequency = -580.6 cm<sup>-1</sup>

|   |             |             |             |
|---|-------------|-------------|-------------|
| C | 5.27172100  | -3.78553800 | 0.23943900  |
| N | 5.67465400  | -2.50823200 | 0.17716600  |
| C | 4.81732900  | -1.47587700 | 0.02832500  |
| C | 3.44405800  | -1.70954800 | -0.07452000 |
| C | 3.01080500  | -3.04891700 | -0.00747200 |
| C | 3.91895000  | -4.07765200 | 0.14890100  |
| C | 7.11811400  | -2.18371100 | 0.25455500  |
| C | 2.55656300  | 0.60271200  | -0.43217100 |
| S | 3.94981100  | 1.51261400  | -0.42159300 |
| C | 1.03906900  | 2.48037600  | -0.87753500 |
| C | 0.00977600  | 3.10158200  | -0.18418300 |
| N | -0.31226400 | 4.38820900  | -0.44008700 |
| C | 0.35915800  | 5.11583400  | -1.35011900 |
| C | 1.39531000  | 4.54499600  | -2.06761600 |
| C | 1.73621300  | 3.21938700  | -1.84601700 |
| C | -1.42218800 | 4.99615900  | 0.32357800  |
| O | -0.17006500 | -1.13894200 | -0.21945600 |
| C | -0.94797300 | -1.20088500 | 0.95530700  |
| C | -1.71854900 | -2.02466700 | 0.02410200  |
| C | -1.51899300 | 0.09930700  | 1.45966900  |
| C | -0.93563300 | 0.70728900  | 2.57502300  |
| C | -1.44348600 | 1.90158100  | 3.08453200  |
| C | -2.55335600 | 2.49478800  | 2.48460000  |
| C | -3.13212400 | 1.90572600  | 1.35948000  |
| C | -2.61123400 | 0.72063400  | 0.84265600  |
| H | 6.03802300  | -4.54068700 | 0.35829100  |
| H | 5.24402300  | -0.48420700 | -0.00996900 |
| H | 1.94775300  | -3.25806400 | -0.09111100 |
| H | 3.59531100  | -5.10997300 | 0.19686700  |
| H | 1.48264800  | -1.11981900 | -0.22197600 |
| H | 7.26674800  | -1.42882600 | 1.02582500  |
| H | 7.67166100  | -3.08462800 | 0.50941500  |
| H | 7.44560400  | -1.80528700 | -0.71400500 |
| H | 0.49908600  | 0.48818600  | -0.51474700 |
| H | -0.56442300 | 2.59667500  | 0.58812900  |
| H | 0.04097800  | 6.14217800  | -1.48543900 |
| H | 1.91575500  | 5.13976200  | -2.80812700 |
| H | 2.52464700  | 2.74717400  | -2.41803700 |
| H | -1.50252500 | 6.04721600  | 0.05477700  |
| H | -2.34624900 | 4.47209700  | 0.07873000  |
| H | -1.21001600 | 4.89809700  | 1.38829800  |
| H | -0.46871800 | -1.75172300 | 1.77468600  |

|   |             |             |             |
|---|-------------|-------------|-------------|
| H | -1.39080400 | -3.04149400 | -0.14496400 |
| H | -2.29036300 | -1.54410900 | -0.75795300 |
| H | -0.09041800 | 0.22984500  | 3.06425900  |
| H | -0.99389300 | 2.34910700  | 3.96481500  |
| H | -2.98072200 | 3.39960800  | 2.90641300  |
| H | -4.00800400 | 2.35348800  | 0.89892600  |
| H | -3.09102600 | 0.26854500  | -0.02140800 |
| N | 2.46380700  | -0.75133500 | -0.23471400 |
| N | 1.30236800  | 1.13610700  | -0.61235600 |
| N | -3.47984400 | -2.62891400 | 0.90134500  |
| H | -3.38744100 | -3.59199400 | 1.21873300  |
| H | -3.62471900 | -2.04131800 | 1.72071000  |
| C | -4.55652900 | -2.48742500 | -0.03701100 |
| C | -4.66437300 | -3.40069000 | -1.08455600 |
| C | -5.43510000 | -1.41023000 | 0.05734700  |
| C | -5.66992200 | -3.24070200 | -2.03193400 |
| H | -3.97725400 | -4.24052100 | -1.14903000 |
| C | -6.43485700 | -1.25614700 | -0.90003400 |
| H | -5.35529800 | -0.71257700 | 0.88781300  |
| C | -6.55480000 | -2.16823600 | -1.94434900 |
| H | -5.76442000 | -3.96014600 | -2.83792300 |
| H | -7.13125300 | -0.42863600 | -0.81786600 |
| H | -7.33988100 | -2.04998000 | -2.68245200 |



**TS1(VIIIA)**Value of imaginary frequency = -527.3 cm<sup>-1</sup>

|   |             |             |             |
|---|-------------|-------------|-------------|
| C | 6.69941000  | -2.18782400 | 0.04236000  |
| N | 5.65861500  | -2.61475800 | 0.77774200  |
| C | 4.45511600  | -2.00963400 | 0.70972800  |
| C | 4.23577000  | -0.93355100 | -0.14179300 |
| C | 5.30765900  | -0.49327600 | -0.93803900 |
| C | 6.53878700  | -1.12139800 | -0.82623400 |
| C | 5.81509000  | -3.77867500 | 1.67835600  |
| C | 2.65469800  | 0.96140300  | -0.22681300 |
| S | 3.78322700  | 2.17836300  | -0.27550800 |
| C | 0.66923900  | 2.36194800  | 0.00000500  |
| C | -0.32947800 | 2.45737200  | 0.96582600  |
| N | -0.99265600 | 3.60915100  | 1.16504500  |
| C | -0.72213700 | 4.71143400  | 0.43734800  |
| C | 0.25085300  | 4.67137800  | -0.54182700 |
| C | 0.95430200  | 3.49445600  | -0.77311300 |
| C | -2.00569500 | 3.70259100  | 2.23741200  |
| O | 0.35142600  | -1.27536700 | 0.17078400  |
| C | -1.40937500 | -1.59676300 | -0.35542600 |
| C | -0.13003300 | -1.84706800 | -1.01849700 |
| C | -2.07639800 | -0.27980700 | -0.36152400 |
| C | -2.97496300 | 0.01939400  | 0.66837800  |
| C | -3.69033400 | 1.21484900  | 0.65313200  |
| C | -3.51737700 | 2.11611800  | -0.39569900 |
| C | -2.62091000 | 1.82580700  | -1.42609700 |
| C | -1.90502800 | 0.63294000  | -1.41105900 |
| H | 7.63490900  | -2.71998600 | 0.16268700  |
| H | 3.67796500  | -2.40267800 | 1.35606700  |
| H | 5.16391900  | 0.32079900  | -1.63535200 |
| H | 7.38244000  | -0.80037000 | -1.42486700 |
| H | 2.17042200  | -1.00290900 | 0.06270100  |
| H | 5.34987200  | -3.54966900 | 2.63637000  |
| H | 5.34071100  | -4.64805800 | 1.22174200  |
| H | 6.87578300  | -3.96890300 | 1.82785600  |
| H | 0.73216100  | 0.23904600  | 0.00360300  |
| H | -0.60704500 | 1.61163000  | 1.58495000  |
| H | -1.29725900 | 5.59895900  | 0.67347800  |
| H | 0.45174100  | 5.56274400  | -1.12361900 |
| H | 1.71041300  | 3.44217200  | -1.54586300 |
| H | -2.17598300 | 2.71108500  | 2.65107800  |
| H | -1.63550600 | 4.37543200  | 3.01168600  |
| H | -2.93431900 | 4.08407100  | 1.81320600  |
| H | -1.66119000 | -2.27571400 | 0.45174000  |

|   |             |             |             |
|---|-------------|-------------|-------------|
| H | 0.13050400  | -2.90127800 | -1.15774700 |
| H | 0.07759200  | -1.27837100 | -1.93348200 |
| H | -3.14132000 | -0.70570000 | 1.46086200  |
| H | -4.41144800 | 1.41936200  | 1.43869200  |
| H | -4.10242300 | 3.03081200  | -0.42969000 |
| H | -2.49771500 | 2.51941200  | -2.25171200 |
| H | -1.22412200 | 0.40892000  | -2.22760500 |
| N | 2.95862100  | -0.38828600 | -0.18675700 |
| N | 1.29830000  | 1.13156200  | -0.15761000 |
| N | -2.94788800 | -2.59398500 | -1.49440700 |
| H | -3.07553200 | -2.10784300 | -2.37877100 |
| H | -2.60369600 | -3.53235100 | -1.68600900 |
| C | -4.14518400 | -2.61376700 | -0.71840200 |
| C | -5.12747800 | -1.64635300 | -0.92441200 |
| C | -4.27211300 | -3.54067600 | 0.31667600  |
| C | -6.24559300 | -1.61711700 | -0.09661000 |
| H | -5.01394700 | -0.91877200 | -1.72469300 |
| C | -5.39405400 | -3.50289800 | 1.13855900  |
| H | -3.50757600 | -4.29937700 | 0.46611100  |
| C | -6.38167100 | -2.54100900 | 0.93637000  |
| H | -7.01612800 | -0.87260200 | -0.26614200 |
| H | -5.50084300 | -4.23469100 | 1.93190600  |
| H | -7.25899800 | -2.52108500 | 1.57296300  |

**TS1(VIIIB)**Value of imaginary frequency = -583.7 cm<sup>-1</sup>

|   |             |             |             |
|---|-------------|-------------|-------------|
| C | 5.47364400  | -3.46352900 | 0.48030700  |
| N | 4.49890200  | -3.63605700 | -0.43190800 |
| C | 3.54195900  | -2.70520800 | -0.61932400 |
| C | 3.51017900  | -1.53939400 | 0.13765200  |
| C | 4.50440600  | -1.35958600 | 1.11356600  |
| C | 5.49102000  | -2.32479900 | 1.26544500  |
| C | 4.51641000  | -4.83331900 | -1.30187800 |
| C | 2.61261400  | 0.71839800  | -0.22863400 |
| S | 4.01930200  | 1.55199700  | 0.06608700  |
| C | 1.15801100  | 2.62017800  | -0.87687400 |
| C | -0.14378100 | 3.06197800  | -0.64050100 |
| N | -0.50296400 | 4.33081100  | -0.90692600 |
| C | 0.37857400  | 5.23299400  | -1.38137400 |
| C | 1.67936600  | 4.84827700  | -1.63751200 |
| C | 2.07812200  | 3.53734000  | -1.40782700 |
| C | -1.88709200 | 4.76541000  | -0.62389800 |
| O | -0.12627200 | -0.98918800 | -0.46963600 |
| C | -0.78276000 | -1.04191500 | 0.77986000  |
| C | -1.62337200 | -1.91002400 | -0.04199100 |
| C | -1.32336000 | 0.26641200  | 1.29482200  |
| C | -0.52189800 | 1.03765800  | 2.14258200  |
| C | -0.96476900 | 2.27252500  | 2.61191500  |
| C | -2.22692700 | 2.74164300  | 2.24852100  |
| C | -3.03224400 | 1.98174100  | 1.40032000  |
| C | -2.57765100 | 0.75505400  | 0.91537200  |
| H | 6.21229600  | -4.25197100 | 0.55941900  |
| H | 2.81069700  | -2.90399600 | -1.39485700 |
| H | 4.48927000  | -0.48040800 | 1.74299400  |
| H | 6.26989600  | -2.20980700 | 2.00923700  |
| H | 1.52065100  | -1.03165500 | -0.32832700 |
| H | 5.05623300  | -4.59783400 | -2.22001700 |
| H | 5.01213400  | -5.64560700 | -0.77379600 |
| H | 3.49134400  | -5.12043300 | -1.52969300 |
| H | 0.61924500  | 0.62675800  | -0.67957100 |
| H | -0.91554800 | 2.40821400  | -0.24482500 |
| H | 0.00403900  | 6.23495900  | -1.55218200 |
| H | 2.37455800  | 5.57273500  | -2.04365100 |
| H | 3.08408800  | 3.22249300  | -1.64586100 |
| H | -2.19472600 | 5.47648500  | -1.38920700 |
| H | -2.53875300 | 3.89432800  | -0.64133200 |
| H | -1.91779200 | 5.23135900  | 0.36220600  |
| H | -0.20391600 | -1.55473400 | 1.56001600  |

|   |             |             |             |
|---|-------------|-------------|-------------|
| H | -1.27808800 | -2.91761400 | -0.22860800 |
| H | -2.28777000 | -1.46174000 | -0.76892800 |
| H | 0.45300300  | 0.66195900  | 2.44570300  |
| H | -0.33851300 | 2.85467400  | 3.27984100  |
| H | -2.59226000 | 3.68341300  | 2.64638500  |
| H | -4.02376300 | 2.33310300  | 1.12962800  |
| H | -3.22195600 | 0.17438800  | 0.25998800  |
| N | 2.47079800  | -0.64464800 | -0.09986200 |
| N | 1.42204900  | 1.27853800  | -0.62739200 |
| N | -3.24844100 | -2.56770100 | 1.03140800  |
| H | -3.05945400 | -3.51220000 | 1.36192800  |
| H | -3.34712400 | -1.96666500 | 1.84805300  |
| C | -4.42523000 | -2.52745200 | 0.20919900  |
| C | -4.55959800 | -3.45783900 | -0.82018000 |
| C | -5.38105600 | -1.53009600 | 0.39204500  |
| C | -5.66533200 | -3.39465000 | -1.66095200 |
| H | -3.81179100 | -4.23541200 | -0.95304100 |
| C | -6.48090200 | -1.47112400 | -0.46056500 |
| H | -5.28164400 | -0.82239400 | 1.21192000  |
| C | -6.62559900 | -2.40005600 | -1.48654100 |
| H | -5.77883600 | -4.12798900 | -2.45176600 |
| H | -7.23430700 | -0.70568500 | -0.30943300 |
| H | -7.48867200 | -2.35749800 | -2.14109700 |

**IM1(IA)**

|   |             |             |             |
|---|-------------|-------------|-------------|
| C | -4.83097600 | 0.55229500  | -0.47743300 |
| C | -4.26723900 | -0.60501600 | -1.00294600 |
| C | -3.02747700 | -0.57594000 | -1.62707100 |
| C | -2.33199800 | 0.63316400  | -1.75152700 |
| C | -2.89375200 | 1.80571900  | -1.24196200 |
| C | -4.12544200 | 1.74354400  | -0.59743500 |
| N | -1.08465600 | 0.60764600  | -2.40407200 |
| C | 0.14119500  | 0.96131100  | -1.83210600 |
| N | 1.10869200  | 0.15888600  | -2.27713000 |
| S | 0.22794500  | 2.17785800  | -0.64111100 |
| C | 2.40251900  | 0.24295700  | -1.80232200 |
| C | 3.11343700  | 1.42125100  | -1.48102900 |
| C | 4.36076000  | 1.34241500  | -0.87597600 |
| C | 4.96467900  | 0.12317200  | -0.56301400 |
| C | 4.30123300  | -1.03208200 | -0.95109700 |
| C | 3.06799800  | -0.97643100 | -1.59384600 |
| O | -0.10180900 | -2.27763200 | -1.95801400 |
| C | 0.24023900  | -1.67541300 | 0.35880600  |
| C | 0.35529500  | -2.75492500 | -0.73427700 |
| C | -4.67285000 | 2.97916300  | 0.05563100  |
| F | -4.28254900 | 4.09715400  | -0.56499400 |
| F | -4.25920600 | 3.07629500  | 1.33524300  |
| F | -6.01410600 | 2.97396400  | 0.08668600  |
| C | -5.02434000 | -1.89748200 | -0.90132300 |
| F | -5.92488700 | -2.02704900 | -1.88722100 |
| F | -5.70577500 | -1.98268000 | 0.25589800  |
| F | -4.21422100 | -2.96469800 | -0.96871900 |
| C | 4.82597300  | -2.38785900 | -0.60196900 |
| F | 6.02508700  | -2.35888600 | -0.02490900 |
| F | 4.88138100  | -3.21201200 | -1.64937000 |
| F | 3.98053700  | -2.99745100 | 0.29558300  |
| C | 5.02714000  | 2.61373400  | -0.43158300 |
| F | 4.61147100  | 2.97053700  | 0.80170100  |
| F | 4.75737900  | 3.63755000  | -1.24537500 |
| F | 6.35928100  | 2.48119600  | -0.36265700 |
| C | -1.09584100 | -1.53252500 | 1.04280600  |
| C | -1.53244600 | -0.25453400 | 1.40893100  |
| C | -2.76018800 | -0.08615000 | 2.04009900  |
| C | -3.56050600 | -1.19298900 | 2.31168900  |
| C | -3.12796300 | -2.46857400 | 1.96004100  |
| C | -1.89920400 | -2.63952700 | 1.32874200  |
| H | -5.79065100 | 0.52353300  | 0.02683100  |
| H | -2.56361400 | -1.49482100 | -1.97596200 |

|   |             |             |             |
|---|-------------|-------------|-------------|
| H | -2.36602400 | 2.74484500  | -1.34027700 |
| H | -0.97936400 | -0.19402300 | -3.01544600 |
| H | 0.42333800  | -1.46130000 | -2.19820000 |
| H | 2.66881400  | 2.38706500  | -1.67992500 |
| H | 5.91937900  | 0.08283900  | -0.05292600 |
| H | 2.59255700  | -1.88955600 | -1.94045600 |
| H | 0.54582600  | -0.71244300 | -0.06061300 |
| H | 1.40621300  | -3.09204500 | -0.78266700 |
| H | -0.23860300 | -3.63642700 | -0.47705700 |
| H | -0.92278300 | 0.61144100  | 1.16056300  |
| H | -3.10531100 | 0.91475100  | 2.27891100  |
| H | -4.53312900 | -1.06231900 | 2.77526600  |
| H | -3.76133400 | -3.32899600 | 2.14839000  |
| H | -1.59621200 | -3.64204000 | 1.04020900  |
| N | 1.33244200  | -1.94942600 | 1.41077500  |
| H | 1.09470900  | -2.80685800 | 1.91878800  |
| H | 2.21935000  | -2.12803800 | 0.91529900  |
| C | 1.53018500  | -0.84652900 | 2.36404100  |
| C | 0.97891500  | -0.93558800 | 3.63324200  |
| C | 2.20995600  | 0.27624700  | 1.91656400  |
| C | 1.13981900  | 0.14324300  | 4.49675700  |
| H | 0.41728000  | -1.81530400 | 3.93563100  |
| C | 2.35849600  | 1.34878200  | 2.78990800  |
| H | 2.59224100  | 0.33361800  | 0.90105100  |
| C | 1.82847500  | 1.27911200  | 4.07580500  |
| H | 0.71713000  | 0.09691900  | 5.49413500  |
| H | 2.88265400  | 2.23341200  | 2.44703400  |
| H | 1.94347000  | 2.11876900  | 4.75263900  |

**IM2(IA)**

|   |             |             |             |
|---|-------------|-------------|-------------|
| C | -4.53170500 | -1.35402600 | 0.45494100  |
| C | -4.01774000 | -1.01159700 | 1.69812700  |
| C | -2.67238100 | -1.19623100 | 1.99543400  |
| C | -1.80405200 | -1.74753000 | 1.04259600  |
| C | -2.32564400 | -2.14728900 | -0.19416400 |
| C | -3.66908000 | -1.92389100 | -0.47333200 |
| N | -0.44920800 | -1.84935100 | 1.37491500  |
| C | 0.69081800  | -1.50090300 | 0.64005000  |
| N | 1.71457600  | -1.30817900 | 1.43060000  |
| S | 0.57752800  | -1.22668600 | -1.07026900 |
| C | 3.00565200  | -1.07438500 | 0.95957400  |
| C | 3.61013800  | -1.79355500 | -0.08398400 |
| C | 4.92201500  | -1.52251000 | -0.44640400 |
| C | 5.67388400  | -0.54361300 | 0.20044200  |
| C | 5.07854400  | 0.15487700  | 1.24093000  |
| C | 3.77022000  | -0.11134300 | 1.62840000  |
| O | 0.59245200  | 1.18944200  | 2.19098300  |
| C | -0.22223800 | 2.35811400  | 0.28196100  |
| C | 1.02349800  | 1.87607500  | 1.03133800  |
| C | -4.17406800 | -2.29296000 | -1.84152700 |
| F | -4.23177700 | -3.61875700 | -2.01014500 |
| F | -3.36723400 | -1.81180100 | -2.80270400 |
| F | -5.40084400 | -1.80073800 | -2.06957700 |
| C | -4.89867600 | -0.36825800 | 2.73124700  |
| F | -5.17773300 | -1.20022300 | 3.74103200  |
| F | -6.06188900 | 0.04337600  | 2.21064100  |
| F | -4.30078700 | 0.71089600  | 3.27440900  |
| C | 5.84572500  | 1.19539900  | 2.00394900  |
| F | 6.98821300  | 1.53157500  | 1.39122400  |
| F | 6.16304100  | 0.77306600  | 3.23740900  |
| F | 5.12302400  | 2.31833900  | 2.15794700  |
| C | 5.52628700  | -2.26483500 | -1.60524000 |
| F | 5.25759000  | -1.65962300 | -2.77296800 |
| F | 5.05536100  | -3.51620700 | -1.69543400 |
| F | 6.86181000  | -2.34013100 | -1.50331100 |
| C | 0.02055800  | 2.98769200  | -1.06287700 |
| C | -0.59371500 | 4.20298600  | -1.36760400 |
| C | -0.40149100 | 4.79783400  | -2.61050700 |
| C | 0.40275700  | 4.17388900  | -3.55960100 |
| C | 1.01206200  | 2.95681100  | -3.26402900 |
| C | 0.82577200  | 2.36140700  | -2.01979500 |
| H | -5.56712500 | -1.15832500 | 0.20685700  |
| H | -2.28097400 | -0.86732300 | 2.95571800  |

|   |             |             |             |
|---|-------------|-------------|-------------|
| H | -1.67236400 | -2.58827300 | -0.93576500 |
| H | -0.24217300 | -1.88006100 | 2.36697100  |
| H | 1.04709400  | 0.32061600  | 2.21013100  |
| H | 3.05147900  | -2.56473600 | -0.60084300 |
| H | 6.69661200  | -0.34025900 | -0.09295900 |
| H | 3.32656400  | 0.43451900  | 2.45721000  |
| H | -0.77767500 | 3.04869400  | 0.92576800  |
| H | 1.61982100  | 1.22238600  | 0.38277900  |
| H | 1.63199900  | 2.74999400  | 1.29061800  |
| H | -1.22813200 | 4.68312400  | -0.62705500 |
| H | -0.88119600 | 5.74430500  | -2.83658500 |
| H | 0.55381200  | 4.63441200  | -4.53056000 |
| H | 1.63721500  | 2.46664100  | -4.00290900 |
| H | 1.29384100  | 1.40326600  | -1.80522200 |
| N | -1.11344000 | 1.14099400  | 0.16227300  |
| H | -0.62083400 | 0.40223300  | -0.43165800 |
| H | -1.11998700 | 0.74160900  | 1.11314500  |
| C | -2.46972700 | 1.36640900  | -0.31971600 |
| C | -2.79101900 | 0.99336000  | -1.61724000 |
| C | -3.40522200 | 1.92816000  | 0.54063400  |
| C | -4.10143300 | 1.16827200  | -2.05439800 |
| H | -2.03824000 | 0.53834900  | -2.25501800 |
| C | -4.70939300 | 2.10379000  | 0.09046200  |
| H | -3.13178900 | 2.18278600  | 1.56099500  |
| C | -5.05587100 | 1.72249200  | -1.20499400 |
| H | -4.37550400 | 0.85252800  | -3.05491400 |
| H | -5.45522800 | 2.51679000  | 0.76083600  |
| H | -6.07660100 | 1.84812500  | -1.55033300 |



**TS2(IA)**Value of imaginary frequency = -1167.8 cm<sup>-1</sup>

|   |             |             |             |
|---|-------------|-------------|-------------|
| C | 4.61911600  | -1.48466200 | -0.35634600 |
| C | 4.10170000  | -1.05950400 | -1.57367200 |
| C | 2.73963000  | -1.11910500 | -1.82866200 |
| C | 1.85596300  | -1.61120100 | -0.85981100 |
| C | 2.36831700  | -2.07991100 | 0.35519800  |
| C | 3.73694400  | -1.99246100 | 0.58889900  |
| N | 0.49260400  | -1.58160700 | -1.19026000 |
| C | -0.63061200 | -1.35233400 | -0.42074100 |
| N | -1.60760200 | -0.85531900 | -1.21351200 |
| S | -0.64482600 | -1.50331300 | 1.26120900  |
| C | -2.96150600 | -0.80620900 | -0.87805000 |
| C | -3.60811600 | -1.74481400 | -0.06197300 |
| C | -4.97333100 | -1.63575000 | 0.16582400  |
| C | -5.73522300 | -0.61991600 | -0.40292900 |
| C | -5.09274100 | 0.29182900  | -1.23041300 |
| C | -3.72869900 | 0.20285300  | -1.47497900 |
| O | -0.51097600 | 1.26219100  | -1.83286600 |
| C | 0.18177000  | 2.57160200  | 0.03010000  |
| C | -1.02331100 | 2.12415300  | -0.84324200 |
| C | 4.25631000  | -2.34997500 | 1.95304600  |
| F | 3.54990800  | -3.33153700 | 2.52004200  |
| F | 4.18891700  | -1.28749800 | 2.78194600  |
| F | 5.53940800  | -2.72989700 | 1.91368800  |
| C | 5.02303500  | -0.52729800 | -2.63574600 |
| F | 5.40569200  | -1.48809200 | -3.48658900 |
| F | 6.13585300  | 0.00001800  | -2.10667000 |
| F | 4.42839800  | 0.42987700  | -3.36813200 |
| C | -5.88722600 | 1.35783200  | -1.92938700 |
| F | -7.00778000 | 1.66215200  | -1.26061300 |
| F | -6.25501300 | 0.97276800  | -3.16113700 |
| F | -5.17827600 | 2.48877200  | -2.07206600 |
| C | -5.63459200 | -2.61113000 | 1.09973200  |
| F | -5.56841300 | -2.19362500 | 2.37293700  |
| F | -5.05559500 | -3.81838500 | 1.05214900  |
| F | -6.93366300 | -2.77030400 | 0.80630400  |
| C | -0.13344200 | 3.00254700  | 1.43468400  |
| C | 0.32458800  | 4.23327300  | 1.90600500  |
| C | 0.04161000  | 4.63925400  | 3.20701800  |
| C | -0.69385000 | 3.81047100  | 4.04887300  |
| C | -1.14492200 | 2.57541700  | 3.58776300  |
| C | -0.87084700 | 2.17179400  | 2.28565900  |
| H | 5.67939200  | -1.40839900 | -0.14555400 |

|   |             |             |             |
|---|-------------|-------------|-------------|
| H | 2.35283800  | -0.73411700 | -2.76882400 |
| H | 1.70621500  | -2.49067600 | 1.10433400  |
| H | 0.30317700  | -1.46331900 | -2.17931000 |
| H | -1.12871800 | 0.18346300  | -1.71080600 |
| H | -3.04989600 | -2.55443200 | 0.39110600  |
| H | -6.79925500 | -0.54760500 | -0.21278700 |
| H | -3.24799600 | 0.91579000  | -2.13920200 |
| H | 0.73308100  | 3.35819300  | -0.49339900 |
| H | -1.75503800 | 1.60610600  | -0.20477800 |
| H | -1.50760900 | 3.00616400  | -1.27505600 |
| H | 0.90537700  | 4.87646100  | 1.25016800  |
| H | 0.39882500  | 5.60003300  | 3.56263700  |
| H | -0.91500300 | 4.12448100  | 5.06380700  |
| H | -1.71722800 | 1.92455000  | 4.24041400  |
| H | -1.22719300 | 1.20273100  | 1.94017500  |
| N | 1.07400500  | 1.36275900  | -0.03942700 |
| H | 0.77396600  | 0.66820700  | 0.66081500  |
| H | 0.61735600  | 1.03183100  | -1.07090900 |
| C | 2.49670300  | 1.60268600  | 0.04861100  |
| C | 3.18534600  | 1.25314300  | 1.20224800  |
| C | 3.15009800  | 2.16703800  | -1.04455700 |
| C | 4.56109200  | 1.47031300  | 1.25981500  |
| H | 2.66106100  | 0.79057100  | 2.03425700  |
| C | 4.52030600  | 2.38501700  | -0.97362500 |
| H | 2.59205100  | 2.40026300  | -1.94791400 |
| C | 5.22645100  | 2.03605000  | 0.17730600  |
| H | 5.10766800  | 1.17764100  | 2.14962800  |
| H | 5.04163900  | 2.79997000  | -1.82947900 |
| H | 6.29900000  | 2.19251300  | 0.22003000  |

**IM3(IA)**

|   |             |             |             |
|---|-------------|-------------|-------------|
| C | 4.59452300  | -1.46050600 | -0.43232200 |
| C | 4.09862900  | -0.83489900 | -1.56900700 |
| C | 2.74365700  | -0.86834900 | -1.86655200 |
| C | 1.85524900  | -1.53673700 | -1.02217200 |
| C | 2.34157000  | -2.20321300 | 0.10274600  |
| C | 3.70250300  | -2.14169000 | 0.38543900  |
| N | 0.49114300  | -1.51527400 | -1.38914500 |
| C | -0.62339700 | -1.38152200 | -0.61140800 |
| N | -1.69842300 | -1.01833400 | -1.39339500 |
| S | -0.67359300 | -1.57341500 | 1.04499900  |
| C | -3.03694300 | -0.90915400 | -0.97498300 |
| C | -3.65747700 | -1.88564100 | -0.19134800 |
| C | -4.99545700 | -1.73509200 | 0.14252200  |
| C | -5.74249700 | -0.64648700 | -0.30109900 |
| C | -5.11743100 | 0.30315000  | -1.09560500 |
| C | -3.77310000 | 0.18293200  | -1.43106100 |
| O | -0.35743200 | 1.40501200  | -2.07189200 |
| C | 0.36495400  | 2.52279200  | -0.05536100 |
| C | -0.82622200 | 2.07232300  | -0.90859600 |
| C | 4.19207800  | -2.76406000 | 1.66321500  |
| F | 3.54110900  | -3.90060600 | 1.94049100  |
| F | 4.00138300  | -1.93974600 | 2.70765700  |
| F | 5.50100900  | -3.04067200 | 1.61249800  |
| C | 5.03480500  | -0.14391300 | -2.52093700 |
| F | 5.35112100  | -0.94386000 | -3.55157100 |
| F | 6.17939100  | 0.21026700  | -1.92792500 |
| F | 4.48151100  | 0.96051200  | -3.04645800 |
| C | -5.89779500 | 1.46252800  | -1.64941600 |
| F | -6.98609100 | 1.72360300  | -0.91638600 |
| F | -6.30835700 | 1.22133100  | -2.90285100 |
| F | -5.15143500 | 2.57619000  | -1.69113900 |
| C | -5.65059700 | -2.74804800 | 1.04171400  |
| F | -5.59945400 | -2.36600200 | 2.32461800  |
| F | -5.05607400 | -3.94485900 | 0.95874600  |
| F | -6.94419800 | -2.90950600 | 0.72981400  |
| C | -0.07477700 | 3.14166100  | 1.25394500  |
| C | 0.19668200  | 4.48053600  | 1.53263300  |
| C | -0.21458500 | 5.05167200  | 2.73428400  |
| C | -0.90059900 | 4.28420700  | 3.66997100  |
| C | -1.17272700 | 2.94421700  | 3.40121800  |
| C | -0.76322600 | 2.37576100  | 2.20017200  |
| H | 5.64793200  | -1.40619200 | -0.18515000 |
| H | 2.37556500  | -0.33966800 | -2.74284500 |

|   |             |             |             |
|---|-------------|-------------|-------------|
| H | 1.67270900  | -2.75392400 | 0.74951200  |
| H | 0.33081000  | -1.41670300 | -2.38474700 |
| H | -1.44166000 | -0.33733000 | -2.10975800 |
| H | -3.10241700 | -2.74998800 | 0.15048200  |
| H | -6.78855700 | -0.54673300 | -0.03566500 |
| H | -3.29502700 | 0.94425100  | -2.04250400 |
| H | 0.93324900  | 3.26168900  | -0.63017200 |
| H | -1.45981800 | 1.40199100  | -0.30479100 |
| H | -1.43005500 | 2.93203400  | -1.21256800 |
| H | 0.73899500  | 5.07818000  | 0.80446000  |
| H | 0.00534800  | 6.09431600  | 2.94013300  |
| H | -1.22140800 | 4.72625100  | 4.60777400  |
| H | -1.70703300 | 2.34083200  | 4.12794200  |
| H | -0.98337100 | 1.32741500  | 2.00171000  |
| N | 1.22611400  | 1.33846500  | 0.09421500  |
| H | 0.79885200  | 0.67701500  | 0.74280600  |
| H | 0.48925000  | 1.02473300  | -1.76646700 |
| C | 2.59051800  | 1.53423900  | 0.42213200  |
| C | 3.13893200  | 0.93140800  | 1.55508700  |
| C | 3.42248200  | 2.25878400  | -0.43869900 |
| C | 4.50189500  | 1.04231800  | 1.81829200  |
| H | 2.49749400  | 0.35594200  | 2.21849400  |
| C | 4.77861700  | 2.37810100  | -0.16248300 |
| H | 3.01105500  | 2.68708300  | -1.34861900 |
| C | 5.32721700  | 1.76737900  | 0.96465800  |
| H | 4.91434500  | 0.55189300  | 2.69411600  |
| H | 5.41560000  | 2.92671900  | -0.84921700 |
| H | 6.38912800  | 1.85268600  | 1.16918400  |

**IM1(IIb)**

|   |             |             |             |
|---|-------------|-------------|-------------|
| C | -5.34392700 | 0.63924900  | 0.48408000  |
| C | -4.14671700 | 1.33501700  | 0.58105200  |
| C | -2.93914600 | 0.73728500  | 0.24215900  |
| C | -2.89512200 | -0.58248300 | -0.21703800 |
| C | -4.10069200 | -1.29137600 | -0.31307200 |
| C | -5.29742800 | -0.67906900 | 0.03689600  |
| N | -1.63662000 | -1.14880900 | -0.47274200 |
| C | -1.41450600 | -1.79368900 | -1.60056500 |
| N | -0.11162600 | -2.32428300 | -1.75622400 |
| S | -2.40230600 | -2.00727400 | -2.96593000 |
| C | 0.93181800  | -2.46262200 | -0.86997800 |
| C | 0.76912100  | -2.58764300 | 0.52385000  |
| C | 1.88161500  | -2.72971500 | 1.33762500  |
| C | 3.18108800  | -2.76622600 | 0.83120800  |
| C | 3.33438900  | -2.64040600 | -0.54404000 |
| C | 2.23964500  | -2.48556800 | -1.38689500 |
| O | 0.09234500  | 0.25462000  | 0.89748500  |
| C | 0.86826900  | 0.72573800  | -0.14879200 |
| C | 2.30071000  | 0.70805300  | 0.40208600  |
| C | -6.57481600 | -1.45541500 | -0.11006100 |
| F | -6.41490000 | -2.74372800 | 0.22857600  |
| F | -7.02844100 | -1.43820500 | -1.37168500 |
| F | -7.55401100 | -0.95652400 | 0.66333000  |
| C | -4.12752900 | 2.77223200  | 1.00840900  |
| F | -3.08043900 | 3.04047100  | 1.81263000  |
| F | -5.24045900 | 3.12041200  | 1.67002500  |
| F | -4.01589400 | 3.60652700  | -0.03953700 |
| C | 4.70239600  | -2.52000500 | -1.13562500 |
| F | 5.02542000  | -1.18635900 | -1.30041400 |
| F | 4.79948200  | -3.05845500 | -2.34892500 |
| F | 5.65836600  | -3.02844900 | -0.36341500 |
| C | 1.70544800  | -2.70264800 | 2.83058100  |
| F | 0.49160800  | -3.10353100 | 3.21032500  |
| F | 1.88401500  | -1.45271300 | 3.29271600  |
| F | 2.61063500  | -3.47811300 | 3.44642000  |
| C | 0.51430500  | 2.13434800  | -0.59303800 |
| C | 0.68269600  | 2.53311700  | -1.92128200 |
| C | 0.46341200  | 3.86061600  | -2.29476700 |
| C | 0.04863500  | 4.78549300  | -1.34300900 |
| C | -0.16122000 | 4.38192700  | -0.02251100 |
| C | 0.08004700  | 3.06571800  | 0.35438600  |
| H | -6.28374900 | 1.10039000  | 0.76226600  |
| H | -2.01601000 | 1.29679000  | 0.34072200  |

|   |             |             |             |
|---|-------------|-------------|-------------|
| H | -4.09259400 | -2.31859500 | -0.65841300 |
| H | -0.59477300 | -0.36399200 | 0.45787200  |
| H | 0.05002000  | -2.61389800 | -2.71133100 |
| H | -0.22572200 | -2.56002200 | 0.94969000  |
| H | 4.03383000  | -2.88283000 | 1.48972900  |
| H | 2.39237900  | -2.38573500 | -2.45835200 |
| H | 0.81253500  | 0.06451500  | -1.03078100 |
| H | 2.58562800  | -0.29165800 | 0.73067100  |
| H | 2.37756700  | 1.40640700  | 1.23713700  |
| H | 0.92627400  | 1.79136000  | -2.68263400 |
| H | 0.58613500  | 4.15970400  | -3.33055900 |
| H | -0.14348600 | 5.81330100  | -1.63271200 |
| H | -0.52832200 | 5.09316700  | 0.71028600  |
| H | -0.10120300 | 2.72865400  | 1.37134400  |
| N | 3.29348000  | 1.15850800  | -0.65773900 |
| H | 3.74153200  | 0.32971000  | -1.06872200 |
| H | 2.75271900  | 1.62713400  | -1.39976100 |
| C | 4.31317100  | 2.10693300  | -0.18386800 |
| C | 5.58322500  | 1.64595200  | 0.12382700  |
| C | 3.93415900  | 3.43549500  | -0.03147800 |
| C | 6.51759700  | 2.56358300  | 0.59895900  |
| H | 5.83858600  | 0.59977500  | -0.01041600 |
| C | 4.88138000  | 4.33585100  | 0.44373000  |
| H | 2.92157700  | 3.75491800  | -0.27390600 |
| C | 6.16791900  | 3.90111500  | 0.75821200  |
| H | 7.51885800  | 2.22740600  | 0.84407000  |
| H | 4.61150400  | 5.37852300  | 0.56878800  |
| H | 6.90011400  | 4.60934000  | 1.13026000  |

**IM2(IIb)**

|   |             |             |             |
|---|-------------|-------------|-------------|
| C | -5.26540800 | -0.35860400 | 0.77266100  |
| C | -4.40027800 | 0.70791100  | 0.58313200  |
| C | -3.12348200 | 0.51219500  | 0.06797100  |
| C | -2.67873900 | -0.76379900 | -0.27621200 |
| C | -3.54945500 | -1.84774400 | -0.09259400 |
| C | -4.81885500 | -1.63372800 | 0.42552400  |
| N | -1.34598500 | -0.90040200 | -0.69448700 |
| C | -1.04345900 | -1.59652700 | -1.77292600 |
| N | 0.35004000  | -1.69715700 | -2.03634800 |
| S | -2.03092700 | -2.30616400 | -2.94649300 |
| C | 1.41361900  | -1.73635400 | -1.17093300 |
| C | 1.29301300  | -1.79495200 | 0.23412300  |
| C | 2.43296500  | -1.83214900 | 1.02391000  |
| C | 3.72226100  | -1.83976300 | 0.49178400  |
| C | 3.83739400  | -1.79250600 | -0.89297000 |
| C | 2.71563600  | -1.72245100 | -1.71490500 |
| O | 0.10390200  | 1.00610200  | 0.30002000  |
| C | 0.52596900  | 1.74698500  | -0.80961600 |
| C | 1.90570800  | 2.29644100  | -0.42755100 |
| C | -5.75908300 | -2.79482200 | 0.58338100  |
| F | -5.10271000 | -3.95223000 | 0.74780000  |
| F | -6.55566000 | -2.94047000 | -0.48516000 |
| F | -6.56529500 | -2.63396200 | 1.64663000  |
| C | -4.81292900 | 2.11283900  | 0.90838800  |
| F | -3.87917400 | 2.74376500  | 1.65064100  |
| F | -5.96346100 | 2.16058500  | 1.59284500  |
| F | -4.97334400 | 2.85760300  | -0.19645600 |
| C | 5.19277500  | -1.79416900 | -1.54458400 |
| F | 5.27694200  | -0.81506000 | -2.47235100 |
| F | 5.44800100  | -2.94296800 | -2.17244900 |
| F | 6.17492700  | -1.57970000 | -0.66025300 |
| C | 2.26292300  | -1.67913600 | 2.50805700  |
| F | 1.15943700  | -2.26215900 | 2.96810600  |
| F | 2.16142100  | -0.35496100 | 2.80890800  |
| F | 3.30718100  | -2.14758600 | 3.19430700  |
| C | -0.38615800 | 2.90643200  | -1.16302600 |
| C | -0.39119200 | 3.43229200  | -2.45388000 |
| C | -1.22068800 | 4.50447800  | -2.76922300 |
| C | -2.05959100 | 5.04448200  | -1.79753800 |
| C | -2.05998600 | 4.51846100  | -0.50787800 |
| C | -1.21181000 | 3.46326100  | -0.18584900 |
| H | -6.25424400 | -0.21075600 | 1.19016200  |
| H | -2.46389400 | 1.35886400  | -0.07884000 |

|   |             |             |             |
|---|-------------|-------------|-------------|
| H | -3.22581800 | -2.84813900 | -0.35411200 |
| H | -0.46805000 | 0.21414300  | -0.05902700 |
| H | 0.51685800  | -2.03852800 | -2.97444100 |
| H | 0.30953400  | -1.79249300 | 0.68694300  |
| H | 4.59655000  | -1.85477300 | 1.13042000  |
| H | 2.84225100  | -1.66519400 | -2.79279300 |
| H | 0.63158500  | 1.09316900  | -1.69415800 |
| H | 1.80857300  | 3.06674900  | 0.34145200  |
| H | 2.47916900  | 2.68542200  | -1.27084700 |
| H | 0.23623900  | 2.98595400  | -3.22253700 |
| H | -1.22905000 | 4.90273300  | -3.77859800 |
| H | -2.72377000 | 5.86446000  | -2.05012000 |
| H | -2.73434400 | 4.91224000  | 0.24507600  |
| H | -1.21683300 | 3.02992400  | 0.81008800  |
| N | 2.66310200  | 1.16127800  | 0.19987000  |
| H | 1.98169600  | 0.75179300  | 0.86916000  |
| H | 2.80802400  | 0.42186500  | -0.50323300 |
| C | 3.93802000  | 1.51031400  | 0.82263200  |
| C | 3.93928000  | 2.00790100  | 2.11839500  |
| C | 5.10389800  | 1.35073800  | 0.08661100  |
| C | 5.15843600  | 2.35332700  | 2.69280100  |
| H | 3.01000200  | 2.10314500  | 2.67187700  |
| C | 6.31620500  | 1.69280600  | 0.67717000  |
| H | 5.07030900  | 0.95308200  | -0.92405600 |
| C | 6.34227500  | 2.19558100  | 1.97541300  |
| H | 5.18178700  | 2.73726600  | 3.70654200  |
| H | 7.23763800  | 1.55908400  | 0.12143800  |
| H | 7.28932700  | 2.45961200  | 2.43335500  |



**TS2(IIb)**Value of imaginary frequency = -96.6 cm<sup>-1</sup>

|   |             |             |             |
|---|-------------|-------------|-------------|
| C | -4.98539700 | -0.47338500 | 0.82852000  |
| C | -4.16059700 | 0.61441700  | 0.58464100  |
| C | -2.93329600 | 0.45699500  | -0.04843100 |
| C | -2.49307500 | -0.80479700 | -0.45121100 |
| C | -3.32064700 | -1.91095000 | -0.20890300 |
| C | -4.54533800 | -1.73157900 | 0.41966400  |
| N | -1.19844700 | -0.89566900 | -0.97970200 |
| C | -0.89816200 | -1.66705800 | -2.01472800 |
| N | 0.48539100  | -1.69848700 | -2.31038900 |
| S | -1.89287100 | -2.51358800 | -3.07664500 |
| C | 1.55961200  | -1.68924300 | -1.44442300 |
| C | 1.44916200  | -1.83288000 | -0.04586300 |
| C | 2.59031100  | -1.81520400 | 0.74593700  |
| C | 3.86742900  | -1.67216600 | 0.20687400  |
| C | 3.96764500  | -1.52698900 | -1.17190500 |
| C | 2.84475400  | -1.52854900 | -1.99131900 |
| O | 0.28619900  | 0.96177300  | -0.18059000 |
| C | 0.62499300  | 1.88748000  | -1.17386300 |
| C | 1.98681100  | 2.45913600  | -0.70656900 |
| C | -5.44239300 | -2.91889500 | 0.62887400  |
| F | -4.74255600 | -4.04971700 | 0.79817900  |
| F | -6.25979500 | -3.11416500 | -0.41566600 |
| F | -6.22432800 | -2.76230500 | 1.70996000  |
| C | -4.56022300 | 2.00196100  | 0.99138300  |
| F | -3.60482400 | 2.58887300  | 1.74312400  |
| F | -5.69240500 | 2.01888200  | 1.70614400  |
| F | -4.74208900 | 2.80359100  | -0.06930900 |
| C | 5.28371500  | -1.12650900 | -1.76623000 |
| F | 5.36068600  | 0.23840500  | -1.79147200 |
| F | 5.43690000  | -1.53307400 | -3.02569500 |
| F | 6.32571300  | -1.54952500 | -1.05196600 |
| C | 2.43558500  | -1.94822300 | 2.23868400  |
| F | 2.29131400  | -3.22306000 | 2.61367300  |
| F | 1.35819400  | -1.28003600 | 2.67556700  |
| F | 3.50453300  | -1.45614400 | 2.88340100  |
| C | -0.36291700 | 3.02419300  | -1.33112800 |
| C | -0.51869400 | 3.66206500  | -2.56025300 |
| C | -1.41291400 | 4.72140300  | -2.69159300 |
| C | -2.16565600 | 5.13746500  | -1.59708700 |
| C | -2.01557000 | 4.49996500  | -0.36727400 |
| C | -1.10551700 | 3.45682500  | -0.23089800 |
| H | -5.93795900 | -0.35278400 | 1.32996800  |

|   |             |             |             |
|---|-------------|-------------|-------------|
| H | -2.30873400 | 1.32138100  | -0.24098400 |
| H | -3.00083200 | -2.90141600 | -0.50889600 |
| H | -0.35659000 | 0.14014200  | -0.55985600 |
| H | 0.65893600  | -2.07058400 | -3.23529800 |
| H | 0.46977000  | -1.92618500 | 0.40812100  |
| H | 4.74298200  | -1.63491400 | 0.84350000  |
| H | 2.95747800  | -1.38946700 | -3.06266700 |
| H | 0.75728600  | 1.38551200  | -2.14841600 |
| H | 1.82373900  | 3.16496100  | 0.10977200  |
| H | 2.56859200  | 2.93415900  | -1.49709600 |
| H | 0.04513900  | 3.31669100  | -3.42389900 |
| H | -1.53696600 | 5.20646500  | -3.65436100 |
| H | -2.88057700 | 5.94626700  | -1.70587100 |
| H | -2.62106500 | 4.79603400  | 0.48244500  |
| H | -0.99912100 | 2.93887700  | 0.71825500  |
| N | 2.72897300  | 1.28376900  | -0.13259400 |
| H | 1.88794900  | 0.63329100  | 0.00693900  |
| H | 3.37968600  | 0.87042000  | -0.80648600 |
| C | 3.37643500  | 1.46795700  | 1.16461100  |
| C | 2.55226200  | 1.56016400  | 2.27946300  |
| C | 4.76017800  | 1.49477000  | 1.25518900  |
| C | 3.14512600  | 1.69143500  | 3.53053200  |
| H | 1.47339000  | 1.50075100  | 2.15802100  |
| C | 5.33703800  | 1.62694500  | 2.51571000  |
| H | 5.37263700  | 1.39422700  | 0.36375400  |
| C | 4.53274000  | 1.72718600  | 3.64792000  |
| H | 2.52006600  | 1.75111500  | 4.41458800  |
| H | 6.41722300  | 1.64672900  | 2.61013300  |
| H | 4.98942000  | 1.82513900  | 4.62676200  |

**IM3(IIb)**

|   |             |             |             |
|---|-------------|-------------|-------------|
| C | 4.75768100  | -0.88749300 | 0.62825300  |
| C | 3.49505300  | -1.46492200 | 0.51266600  |
| C | 2.35243000  | -0.68831600 | 0.46250400  |
| C | 2.45150700  | 0.71022700  | 0.50951100  |
| C | 3.70383800  | 1.30409800  | 0.66111800  |
| C | 4.83663100  | 0.49271400  | 0.71138100  |
| N | 1.22862000  | 1.40234600  | 0.42484600  |
| C | 0.98076000  | 2.69954600  | 0.11139900  |
| N | -0.35607700 | 3.04173900  | 0.12554600  |
| S | 2.07972800  | 3.87236000  | -0.34324600 |
| C | -1.48301900 | 2.29128400  | 0.50219500  |
| C | -1.48917200 | 1.45754800  | 1.62614100  |
| C | -2.60750700 | 0.67603400  | 1.89344500  |
| C | -3.76283500 | 0.75799800  | 1.11938700  |
| C | -3.77288100 | 1.65796400  | 0.05898600  |
| C | -2.64380500 | 2.40272600  | -0.26574300 |
| O | -0.78369100 | -0.45072300 | -0.56698700 |
| C | -0.73177000 | -0.35676000 | -1.99422700 |
| C | -1.75888600 | -1.32373100 | -2.58748900 |
| C | 6.18046700  | 1.16257300  | 0.79140700  |
| F | 6.15587100  | 2.22174800  | 1.61074900  |
| F | 6.57496000  | 1.60631800  | -0.41201900 |
| F | 7.12885100  | 0.32503300  | 1.23406500  |
| C | 3.40006500  | -2.96227800 | 0.45267100  |
| F | 2.16181500  | -3.38443100 | 0.16218400  |
| F | 3.75172000  | -3.52520100 | 1.61723300  |
| F | 4.22748800  | -3.46357200 | -0.48123900 |
| C | -5.00267400 | 1.85557600  | -0.78604400 |
| F | -4.83220500 | 1.37985500  | -2.03729000 |
| F | -5.28184000 | 3.15994800  | -0.91854600 |
| F | -6.07763400 | 1.25793200  | -0.27064300 |
| C | -2.50909800 | -0.33645600 | 3.00291600  |
| F | -1.90458600 | 0.17907600  | 4.08144100  |
| F | -1.77530300 | -1.39229600 | 2.61263300  |
| F | -3.70719400 | -0.79214800 | 3.37761600  |
| C | 0.70087500  | -0.58826400 | -2.40492200 |
| C | 1.52986400  | 0.51284200  | -2.62473800 |
| C | 2.89035300  | 0.34128400  | -2.86462100 |
| C | 3.42741700  | -0.94240100 | -2.91338600 |
| C | 2.60263300  | -2.04907500 | -2.72193400 |
| C | 1.24846800  | -1.87265200 | -2.45515700 |
| H | 5.65140400  | -1.50052300 | 0.65897100  |
| H | 1.37961700  | -1.15762500 | 0.35139400  |

|   |             |             |             |
|---|-------------|-------------|-------------|
| H | 3.80562200  | 2.37749700  | 0.72771600  |
| H | 0.43523000  | 0.76752200  | 0.29815000  |
| H | -0.51750300 | 3.95837700  | -0.26985300 |
| H | -0.61566300 | 1.39333600  | 2.26644200  |
| H | -4.62229200 | 0.13038100  | 1.33422900  |
| H | -2.66079200 | 3.06668300  | -1.12550600 |
| H | -1.02548000 | 0.66317200  | -2.29155700 |
| H | -1.52503300 | -2.35170200 | -2.29005100 |
| H | -1.70667200 | -1.27815500 | -3.67991300 |
| H | 1.11704400  | 1.51860200  | -2.57149500 |
| H | 3.52694200  | 1.21025600  | -2.99737500 |
| H | 4.48890900  | -1.08204500 | -3.09188700 |
| H | 3.02020800  | -3.04986800 | -2.74726600 |
| H | 0.62918200  | -2.74178100 | -2.25312200 |
| N | -3.09709000 | -0.97537100 | -2.14673800 |
| H | -1.70790900 | -0.31217900 | -0.30157300 |
| H | -3.67709000 | -0.51309400 | -2.82910400 |
| C | -3.80413800 | -1.63872000 | -1.14756700 |
| C | -3.16884700 | -2.36242700 | -0.12515700 |
| C | -5.20154700 | -1.50569800 | -1.10387000 |
| C | -3.91700900 | -2.89763800 | 0.91994100  |
| H | -2.09005000 | -2.47453000 | -0.12003400 |
| C | -5.93238700 | -2.03906500 | -0.05157000 |
| H | -5.70805500 | -0.95649500 | -1.89177800 |
| C | -5.29776500 | -2.73497100 | 0.97646300  |
| H | -3.39921700 | -3.42820300 | 1.71254200  |
| H | -7.00996600 | -1.90674400 | -0.03787800 |
| H | -5.86841400 | -3.14552000 | 1.80179900  |

**IM1(IIIB)**

|   |             |             |             |
|---|-------------|-------------|-------------|
| C | -5.49489600 | -0.91268000 | -0.49698900 |
| C | -4.95029000 | 0.12971300  | -1.23268700 |
| C | -3.61669200 | 0.49362800  | -1.08353600 |
| C | -2.79988300 | -0.18028900 | -0.17468800 |
| C | -3.34445200 | -1.21663200 | 0.59180100  |
| C | -4.67328500 | -1.57467100 | 0.41059500  |
| N | -1.48135100 | 0.27116100  | -0.00932300 |
| C | -0.31430000 | -0.45571100 | 0.16515700  |
| N | 0.83097700  | 0.16802900  | 0.25707400  |
| S | -0.34408400 | -2.18644800 | 0.19495900  |
| C | 0.95450100  | 1.55312500  | 0.26196500  |
| C | 0.44352500  | 2.37623900  | 1.27945300  |
| C | 0.74856100  | 3.73333100  | 1.30655700  |
| C | 1.56635400  | 4.31759800  | 0.34452400  |
| C | 2.05811200  | 3.50625100  | -0.67152300 |
| C | 1.74676500  | 2.15496300  | -0.72769900 |
| O | 4.21077000  | -0.04465400 | -1.90177900 |
| C | 3.31999100  | -1.03306900 | -1.43093900 |
| C | 3.53636500  | -1.18748400 | 0.07990300  |
| C | -5.22338000 | -2.72564900 | 1.20721300  |
| F | -4.69847200 | -2.76726100 | 2.43996000  |
| F | -4.95290000 | -3.90211300 | 0.62512300  |
| F | -6.55573700 | -2.64508000 | 1.33499800  |
| C | -5.77643600 | 0.86064300  | -2.25290900 |
| F | -5.60683600 | 2.18866700  | -2.15909700 |
| F | -7.08331500 | 0.60558100  | -2.11688200 |
| F | -5.42772600 | 0.51456800  | -3.50120700 |
| C | 2.95085300  | 4.05983800  | -1.74509900 |
| F | 2.33224300  | 4.11026100  | -2.93090300 |
| F | 4.03516500  | 3.27412100  | -1.91059000 |
| F | 3.38535200  | 5.29054000  | -1.45916900 |
| C | 0.16931200  | 4.56571300  | 2.41773000  |
| F | 0.41530300  | 4.01585300  | 3.61638900  |
| F | -1.16263600 | 4.66771100  | 2.30413300  |
| F | 0.67007800  | 5.80693900  | 2.42995200  |
| C | 3.61408800  | -2.33315400 | -2.14310400 |
| C | 2.58569000  | -3.25175300 | -2.37160200 |
| C | 2.86803700  | -4.48586100 | -2.95530200 |
| C | 4.17318300  | -4.80181800 | -3.32114500 |
| C | 5.19821800  | -3.88286100 | -3.10121800 |
| C | 4.92281100  | -2.65459000 | -2.50956400 |
| H | -6.53490500 | -1.19172300 | -0.61403400 |
| H | -3.21066700 | 1.30535800  | -1.68098400 |

|   |             |             |             |
|---|-------------|-------------|-------------|
| H | -2.73407000 | -1.73103600 | 1.32275700  |
| H | -1.33571800 | 1.24192800  | -0.25789900 |
| H | 4.01182500  | 0.80218700  | -1.48209500 |
| H | -0.16947600 | 1.93821800  | 2.06268800  |
| H | 1.82013600  | 5.36907200  | 0.39256300  |
| H | 2.11107300  | 1.54201800  | -1.54839500 |
| H | 2.26758300  | -0.75818800 | -1.59160100 |
| H | 3.24487700  | -0.27588000 | 0.60454200  |
| H | 4.58476400  | -1.42831000 | 0.28161000  |
| H | 1.56199900  | -2.99379700 | -2.10066600 |
| H | 2.06419000  | -5.19248400 | -3.13425300 |
| H | 4.39070400  | -5.75894100 | -3.78410300 |
| H | 6.21494700  | -4.12372300 | -3.39516100 |
| H | 5.70930400  | -1.92440200 | -2.34829700 |
| N | 2.69396100  | -2.28451200 | 0.64145400  |
| H | 1.62073600  | -2.14035400 | 0.42301800  |
| H | 2.93449200  | -3.15603000 | 0.15597700  |
| C | 2.84637600  | -2.45065300 | 2.08324300  |
| C | 2.12577100  | -1.60398500 | 2.91682400  |
| C | 3.70544900  | -3.42158200 | 2.57896000  |
| C | 2.27935300  | -1.74247900 | 4.29235300  |
| H | 1.45999200  | -0.86504500 | 2.47770400  |
| C | 3.84650700  | -3.55032400 | 3.95771400  |
| H | 4.25649900  | -4.06815500 | 1.90091900  |
| C | 3.13562700  | -2.71161100 | 4.81149700  |
| H | 1.72108800  | -1.09542500 | 4.96012100  |
| H | 4.51209700  | -4.30547300 | 4.36120200  |
| H | 3.24692900  | -2.81534600 | 5.88558400  |

**TS2(IIIB)**Value of imaginary frequency = -677.5 cm<sup>-1</sup>

|   |             |             |             |
|---|-------------|-------------|-------------|
| C | -5.39186000 | -0.81070100 | -0.59920400 |
| C | -4.80879100 | 0.13610600  | -1.42822500 |
| C | -3.48142100 | 0.51780900  | -1.26040300 |
| C | -2.72005800 | -0.03769200 | -0.23370500 |
| C | -3.30514900 | -0.97209300 | 0.62735200  |
| C | -4.62182500 | -1.35873600 | 0.42306800  |
| N | -1.40398800 | 0.42161600  | -0.04147600 |
| C | -0.25817500 | -0.31194300 | 0.19256900  |
| N | 0.89418300  | 0.25063600  | 0.35502200  |
| S | -0.36621500 | -2.06173200 | 0.18740900  |
| C | 1.05539700  | 1.63777300  | 0.35520300  |
| C | 0.52529700  | 2.46665600  | 1.35427900  |
| C | 0.83534400  | 3.82294600  | 1.37500900  |
| C | 1.67434900  | 4.39124800  | 0.42287900  |
| C | 2.19169900  | 3.56721400  | -0.57046400 |
| C | 1.88357900  | 2.21412100  | -0.61763300 |
| O | 4.17570900  | -0.15675400 | -1.67717600 |
| C | 3.27302000  | -1.17530300 | -1.29002300 |
| C | 3.46177900  | -1.46365000 | 0.20306000  |
| C | -5.22530900 | -2.40979800 | 1.31463300  |
| F | -4.68241000 | -2.39219400 | 2.53896600  |
| F | -5.03904500 | -3.63936800 | 0.81608100  |
| F | -6.54719200 | -2.23548600 | 1.45012800  |
| C | -5.58807000 | 0.75433300  | -2.55595200 |
| F | -5.46530800 | 2.09020900  | -2.55344000 |
| F | -6.89154500 | 0.46357600  | -2.48078300 |
| F | -5.14591700 | 0.32732400  | -3.74747100 |
| C | 3.10642900  | 4.11606200  | -1.62994000 |
| F | 2.50105000  | 4.17159800  | -2.82316700 |
| F | 4.18732900  | 3.33100200  | -1.77829100 |
| F | 3.53503900  | 5.34803400  | -1.33485600 |
| C | 0.23108500  | 4.67006200  | 2.46149100  |
| F | 0.44398200  | 4.13362700  | 3.67173300  |
| F | -1.09774000 | 4.77319000  | 2.31145900  |
| F | 0.73427000  | 5.90975500  | 2.47066300  |
| C | 3.55573700  | -2.40712100 | -2.11740800 |
| C | 2.51653000  | -3.27633700 | -2.45654900 |
| C | 2.78345200  | -4.45282900 | -3.15418900 |
| C | 4.08895700  | -4.76124200 | -3.52486600 |
| C | 5.12689900  | -3.89127300 | -3.19540300 |
| C | 4.86398900  | -2.72111100 | -2.49107600 |
| H | -6.42671200 | -1.10247200 | -0.73198100 |

|   |             |             |             |
|---|-------------|-------------|-------------|
| H | -3.03964500 | 1.24949000  | -1.93095600 |
| H | -2.73912100 | -1.38052500 | 1.45589400  |
| H | -1.24011500 | 1.39238400  | -0.27866500 |
| H | 4.08024100  | 0.59413700  | -1.07815000 |
| H | -0.10749100 | 2.03768600  | 2.12647500  |
| H | 1.92817100  | 5.44319500  | 0.46192000  |
| H | 2.28782400  | 1.58499600  | -1.40725200 |
| H | 2.22793400  | -0.86806600 | -1.44162200 |
| H | 3.22390800  | -0.56320000 | 0.77452900  |
| H | 4.50421600  | -1.75320900 | 0.38874700  |
| H | 1.49360600  | -3.02143000 | -2.18340100 |
| H | 1.96859300  | -5.11923100 | -3.41822000 |
| H | 4.29760800  | -5.67290800 | -4.07536200 |
| H | 6.14475800  | -4.12493600 | -3.49149000 |
| H | 5.66234000  | -2.02934900 | -2.24246300 |
| N | 2.54366200  | -2.52700600 | 0.66213400  |
| H | 1.16246600  | -2.24800500 | 0.37708400  |
| H | 2.75666700  | -3.38272200 | 0.14584300  |
| C | 2.59391500  | -2.77984400 | 2.07821500  |
| C | 2.08030000  | -1.81277100 | 2.94199400  |
| C | 3.10657900  | -3.97477000 | 2.57338800  |
| C | 2.09859300  | -2.04614900 | 4.31209200  |
| H | 1.66221900  | -0.89975400 | 2.52419900  |
| C | 3.11058400  | -4.20338700 | 3.94677600  |
| H | 3.50224300  | -4.72027700 | 1.88858100  |
| C | 2.61185100  | -3.23932000 | 4.81743200  |
| H | 1.69963900  | -1.29762000 | 4.98861900  |
| H | 3.50828700  | -5.13559400 | 4.33393100  |
| H | 2.61828400  | -3.41854200 | 5.88721700  |



**IM2(IIIB)**

|   |             |             |             |
|---|-------------|-------------|-------------|
| C | -5.42781900 | -0.77175300 | -0.67525400 |
| C | -4.83002800 | 0.14097000  | -1.53200400 |
| C | -3.50529800 | 0.52865400  | -1.35768200 |
| C | -2.76539700 | 0.01455900  | -0.29493500 |
| C | -3.36555300 | -0.88279400 | 0.59436300  |
| C | -4.67809700 | -1.27941000 | 0.38206700  |
| N | -1.44718900 | 0.47035000  | -0.09486900 |
| C | -0.31581300 | -0.27549800 | 0.15177200  |
| N | 0.84821300  | 0.23577900  | 0.33638700  |
| S | -0.48111300 | -2.03486700 | 0.12348700  |
| C | 1.05760500  | 1.61887600  | 0.36117600  |
| C | 0.47063800  | 2.46251800  | 1.31359000  |
| C | 0.81330700  | 3.81094600  | 1.35586600  |
| C | 1.74327800  | 4.35110500  | 0.47541500  |
| C | 2.32340400  | 3.50762000  | -0.46634600 |
| C | 1.98533800  | 2.16314600  | -0.53710300 |
| O | 4.27846000  | -0.11892500 | -1.53884600 |
| C | 3.38506900  | -1.16252000 | -1.19044600 |
| C | 3.53212200  | -1.48526000 | 0.30020600  |
| C | -5.30376500 | -2.29231100 | 1.30293300  |
| F | -4.75120400 | -2.26178000 | 2.52196800  |
| F | -5.15635600 | -3.53662300 | 0.82944800  |
| F | -6.61857300 | -2.07574900 | 1.44145700  |
| C | -5.59084900 | 0.71564700  | -2.69579300 |
| F | -5.47600200 | 2.05104500  | -2.73383600 |
| F | -6.89296600 | 0.41763400  | -2.63562900 |
| F | -5.12068000 | 0.25174900  | -3.86182200 |
| C | 3.33750300  | 4.02942300  | -1.44687200 |
| F | 2.83102000  | 4.10366700  | -2.68419100 |
| F | 4.40365800  | 3.21396200  | -1.50880600 |
| F | 3.77563900  | 5.24875900  | -1.11437500 |
| C | 0.12992300  | 4.68111400  | 2.37505400  |
| F | 0.21596700  | 4.15446800  | 3.60454900  |
| F | -1.17741300 | 4.80613300  | 2.09825700  |
| F | 0.65306700  | 5.91117600  | 2.41833600  |
| C | 3.69902400  | -2.36756800 | -2.04543700 |
| C | 2.67588700  | -3.23446400 | -2.43398800 |
| C | 2.96659500  | -4.38933100 | -3.15674800 |
| C | 4.28293900  | -4.67934600 | -3.50411000 |
| C | 5.30587400  | -3.81163800 | -3.12672000 |
| C | 5.01737500  | -2.66236200 | -2.39758800 |
| H | -6.46071000 | -1.06788000 | -0.81458700 |
| H | -3.04982500 | 1.23176300  | -2.04914600 |

|   |             |             |             |
|---|-------------|-------------|-------------|
| H | -2.81669000 | -1.25199100 | 1.45320600  |
| H | -1.26863300 | 1.43983900  | -0.32759900 |
| H | 4.26507100  | 0.55182900  | -0.84525900 |
| H | -0.23423200 | 2.05524500  | 2.03323000  |
| H | 2.01732000  | 5.39738500  | 0.52904600  |
| H | 2.44425800  | 1.51791100  | -1.28240700 |
| H | 2.33936200  | -0.86489400 | -1.36017100 |
| H | 3.24058400  | -0.60044600 | 0.87449100  |
| H | 4.58700700  | -1.71543000 | 0.51230100  |
| H | 1.64598600  | -2.99506300 | -2.17561100 |
| H | 2.16336400  | -5.05433600 | -3.45772300 |
| H | 4.51145000  | -5.57449600 | -4.07356100 |
| H | 6.33235800  | -4.03062900 | -3.40383200 |
| H | 5.80412200  | -1.97228100 | -2.11041900 |
| N | 2.64651100  | -2.58651500 | 0.69064400  |
| H | 0.88483400  | -2.23583200 | 0.29643400  |
| H | 2.92518200  | -3.43021700 | 0.19340800  |
| C | 2.54936700  | -2.84458000 | 2.08758400  |
| C | 2.03770700  | -1.85734800 | 2.93552000  |
| C | 2.89852900  | -4.08983600 | 2.60981800  |
| C | 1.90093400  | -2.11682300 | 4.29385800  |
| H | 1.72970700  | -0.90386900 | 2.51309900  |
| C | 2.74325100  | -4.34621700 | 3.96896800  |
| H | 3.29585500  | -4.85616400 | 1.94913700  |
| C | 2.25148300  | -3.35968400 | 4.81760000  |
| H | 1.50423900  | -1.34623900 | 4.94724000  |
| H | 3.01754200  | -5.31918400 | 4.36398300  |
| H | 2.13663100  | -3.55800700 | 5.87778900  |

**Cat-I'(syn-anti)**

|   |             |             |             |
|---|-------------|-------------|-------------|
| C | -4.39032000 | 0.61434700  | 0.37894900  |
| C | -3.40606900 | 1.59287600  | 0.38938700  |
| C | -2.09355100 | 1.29562900  | 0.03969600  |
| C | -1.74422800 | -0.01026800 | -0.30196300 |
| C | -2.71812600 | -1.01279600 | -0.27947100 |
| C | -4.03031200 | -0.68467800 | 0.03477500  |
| N | -0.39815000 | -0.30340900 | -0.59915500 |
| C | 0.10173700  | -0.98876000 | -1.68520700 |
| N | 1.34068000  | -1.18876700 | -1.92342000 |
| S | -1.09613000 | -1.56743000 | -2.87159500 |
| C | 2.32647400  | -0.78354000 | -1.01215400 |
| C | 2.36413000  | -1.24066600 | 0.31128400  |
| C | 3.40837000  | -0.86277900 | 1.15025600  |
| C | 4.42835100  | -0.03236600 | 0.70494900  |
| C | 4.39059200  | 0.40973600  | -0.61417100 |
| C | 3.36281000  | 0.03853000  | -1.47037800 |
| C | -5.08583400 | -1.75621800 | -0.02728800 |
| F | -4.58609500 | -2.95681500 | 0.29145700  |
| F | -5.60044800 | -1.85457500 | -1.26009400 |
| F | -6.09902800 | -1.49639300 | 0.80824800  |
| C | -3.73504600 | 3.01455700  | 0.75738600  |
| F | -2.95633200 | 3.44360600  | 1.76050500  |
| F | -5.00882800 | 3.14992500  | 1.13915500  |
| F | -3.52827200 | 3.84175300  | -0.27630100 |
| C | 5.45712600  | 1.33537700  | -1.13283100 |
| F | 5.00110900  | 2.59331200  | -1.23147300 |
| F | 5.86699800  | 0.97285200  | -2.35584300 |
| F | 6.52903800  | 1.35974200  | -0.33136100 |
| C | 3.39058100  | -1.36060000 | 2.56925800  |
| F | 3.21377000  | -2.68821100 | 2.61824400  |
| F | 2.37960000  | -0.81033100 | 3.26032700  |
| F | 4.52501700  | -1.07356400 | 3.21719700  |
| H | -5.41230900 | 0.85406800  | 0.64685100  |
| H | -1.34223300 | 2.08036600  | 0.02940300  |
| H | -2.45122300 | -2.04293700 | -0.48798700 |
| H | 0.29916600  | 0.22447600  | -0.08751000 |
| H | 1.58942800  | -1.91063300 | 0.67360500  |
| H | 5.24098800  | 0.25118000  | 1.36204100  |
| H | 3.35359600  | 0.36844100  | -2.50397900 |
| H | -0.12591400 | -2.04284400 | -3.66428600 |

**TS3(IIIB)**Value of imaginary frequency = -889.1 cm<sup>-1</sup>

|   |             |             |             |
|---|-------------|-------------|-------------|
| C | 4.40682500  | -0.80477900 | -0.04870100 |
| C | 3.44078700  | -1.57029500 | -0.68261400 |
| C | 2.13034200  | -1.11480400 | -0.80226400 |
| C | 1.77402800  | 0.11922200  | -0.26685200 |
| C | 2.73268800  | 0.89203900  | 0.39523800  |
| C | 4.03658900  | 0.42888900  | 0.48231000  |
| N | 0.42227400  | 0.52247600  | -0.33551200 |
| C | -0.08098100 | 1.72637200  | -0.75332400 |
| N | -1.37435000 | 1.94457100  | -0.77503500 |
| S | 1.03103600  | 2.95074100  | -1.32119600 |
| C | -2.30473000 | 1.02511200  | -0.26109600 |
| C | -2.23490800 | 0.54336300  | 1.05192400  |
| C | -3.21993200 | -0.31167200 | 1.53609500  |
| C | -4.29290000 | -0.69793900 | 0.74389000  |
| C | -4.36667000 | -0.20307500 | -0.55492700 |
| C | -3.39221900 | 0.64824900  | -1.05870900 |
| C | 5.08757600  | 1.27700400  | 1.14573500  |
| F | 4.54780700  | 2.18110500  | 1.97258000  |
| F | 5.81587300  | 1.94470800  | 0.24145200  |
| F | 5.93934900  | 0.52586900  | 1.85757700  |
| C | 3.79324000  | -2.89864800 | -1.29382000 |
| F | 2.91299100  | -3.84517600 | -0.93686300 |
| F | 5.01078000  | -3.30993100 | -0.92283300 |
| F | 3.77597000  | -2.83768500 | -2.63242200 |
| C | -5.49102600 | -0.63359400 | -1.45749700 |
| F | -5.10924100 | -1.63390800 | -2.26466800 |
| F | -5.89954900 | 0.37116800  | -2.24375700 |
| F | -6.54792400 | -1.06572800 | -0.75946000 |
| C | -3.08264800 | -0.81821700 | 2.94584300  |
| F | -2.89253500 | 0.19125200  | 3.80724800  |
| F | -2.02292800 | -1.63249300 | 3.06309800  |
| F | -4.16236500 | -1.49906500 | 3.34352700  |
| H | 5.42423100  | -1.16582800 | 0.04680800  |
| H | 1.38877100  | -1.72118500 | -1.31440200 |
| H | 2.45670800  | 1.83885900  | 0.84332200  |
| H | -0.25856500 | -0.22249500 | -0.24926200 |
| H | -1.41973900 | 0.85470300  | 1.69890300  |
| H | -5.06081800 | -1.35603100 | 1.13169000  |
| H | -3.46641300 | 1.03498800  | -2.07010200 |
| H | -0.21032900 | 3.89117700  | -1.68349200 |
| O | -1.41507900 | 4.24494500  | -1.80136200 |
| H | -1.60855700 | 4.93304500  | -1.15037600 |

|   |             |            |             |
|---|-------------|------------|-------------|
| H | -1.68711500 | 3.31758400 | -1.38591800 |
|---|-------------|------------|-------------|

**TS3'(III B)**

Value of imaginary frequency = -1596.5 cm<sup>-1</sup>

|   |             |             |             |
|---|-------------|-------------|-------------|
| C | -4.53645200 | 0.60384100  | -0.21043700 |
| C | -3.53924200 | 1.40045600  | -0.75326000 |
| C | -2.20951500 | 0.99371100  | -0.73984000 |
| C | -1.86514800 | -0.22676400 | -0.16474700 |
| C | -2.85236700 | -1.03103300 | 0.40849000  |
| C | -4.17477400 | -0.61094600 | 0.36473900  |
| N | -0.50001400 | -0.58466500 | -0.13249700 |
| C | 0.03632300  | -1.81463300 | -0.29043000 |
| N | 1.33111300  | -2.07005300 | -0.31932300 |
| S | -0.77592100 | -3.32278400 | -0.56279600 |
| C | 2.36791400  | -1.16447300 | -0.05999100 |
| C | 2.32438000  | -0.26599300 | 1.01183300  |
| C | 3.39545100  | 0.59336300  | 1.24314300  |
| C | 4.52688100  | 0.56606700  | 0.44180300  |
| C | 4.57388600  | -0.35069100 | -0.60734900 |
| C | 3.51528500  | -1.20835300 | -0.86326500 |
| C | -5.24767300 | -1.50832100 | 0.92285200  |
| F | -4.78079100 | -2.27757900 | 1.91364200  |
| F | -5.73437300 | -2.32283000 | -0.02171300 |
| F | -6.27580300 | -0.79688100 | 1.40260600  |
| C | -3.86827300 | 2.71422400  | -1.40855300 |
| F | -3.11347500 | 3.70404800  | -0.91090700 |
| F | -5.15055900 | 3.05065000  | -1.24017700 |
| F | -3.62717600 | 2.66691200  | -2.72613800 |
| C | 5.77160600  | -0.37314000 | -1.51900600 |
| F | 5.58989200  | 0.42662200  | -2.57922400 |
| F | 6.00709000  | -1.60465100 | -1.98805900 |
| F | 6.87574100  | 0.04700200  | -0.88948800 |
| C | 3.29273800  | 1.54664200  | 2.40219700  |
| F | 3.10942000  | 0.88944900  | 3.55532700  |
| F | 2.24142500  | 2.36841000  | 2.25320600  |
| F | 4.38592000  | 2.30423400  | 2.52994900  |
| H | -5.57075100 | 0.92622800  | -0.22102600 |
| H | -1.44603100 | 1.62650300  | -1.18411100 |
| H | -2.59329200 | -1.96343500 | 0.89641200  |
| H | 0.15998700  | 0.18448700  | -0.17309300 |
| H | 1.47220000  | -0.26033400 | 1.68596700  |
| H | 5.36001300  | 1.23027400  | 0.63781300  |
| H | 3.56409200  | -1.92156200 | -1.67905800 |
| H | 0.83890000  | -3.35682000 | -0.55573500 |

**IM1(VA)**

|   |             |             |             |
|---|-------------|-------------|-------------|
| C | -4.99456000 | -4.19628900 | -0.31022100 |
| N | -5.22345100 | -3.14743000 | 0.49931000  |
| C | -4.39707000 | -2.08403800 | 0.56270900  |
| C | -3.24611100 | -2.01235600 | -0.23781700 |
| C | -2.98742700 | -3.13156400 | -1.05645300 |
| C | -3.85483800 | -4.20887200 | -1.09656500 |
| C | -6.43016100 | -3.12398300 | 1.35356900  |
| C | -2.62963200 | 0.29595800  | -0.03048400 |
| S | -4.11099700 | 0.98203500  | 0.39178400  |
| C | -1.29385600 | 2.43392900  | -0.34795100 |
| C | -2.22816500 | 3.42482600  | -0.02304200 |
| N | -1.93448800 | 4.72837500  | -0.20683400 |
| C | -0.75414800 | 5.15226700  | -0.68501000 |
| C | 0.21896100  | 4.21805200  | -1.00057100 |
| C | -0.04466900 | 2.87228800  | -0.83498800 |
| C | -2.99393100 | 5.71021000  | 0.11643600  |
| O | 0.09236700  | -1.28747700 | -1.19930600 |
| C | 2.25518300  | -1.37002000 | -0.31342900 |
| C | 0.84076400  | -1.94688200 | -0.23233800 |
| C | 2.39452800  | 0.08158400  | 0.06471700  |
| C | 3.22654500  | 0.91131800  | -0.69043000 |
| C | 3.46235900  | 2.22482800  | -0.28929500 |
| C | 2.87065300  | 2.71393000  | 0.87329000  |
| C | 2.02446600  | 1.89688800  | 1.62274500  |
| C | 1.78370800  | 0.58595700  | 1.21908800  |
| H | -5.72835500 | -4.99181800 | -0.30510800 |
| H | -4.67524500 | -1.29968100 | 1.25106900  |
| H | -2.10010000 | -3.11477900 | -1.68250100 |
| H | -3.66885800 | -5.05650000 | -1.74455100 |
| H | -0.88427600 | -1.28494700 | -0.90877500 |
| H | -6.12398500 | -3.08286700 | 2.39883800  |
| H | -7.02269300 | -2.24546000 | 1.09891300  |
| H | -7.01039000 | -4.02649700 | 1.17424800  |
| H | -0.67465000 | 0.53224800  | -0.53478900 |
| H | -3.20886200 | 3.18727400  | 0.36474000  |
| H | -0.62277800 | 6.21990500  | -0.80392100 |
| H | 1.17479900  | 4.55454400  | -1.38303900 |
| H | 0.71389600  | 2.13443800  | -1.08919000 |
| H | -3.35596600 | 5.51786800  | 1.12576500  |
| H | -2.57795400 | 6.71360600  | 0.05791500  |
| H | -3.80584800 | 5.59960900  | -0.60264400 |
| H | 2.63804800  | -1.53798200 | -1.32402100 |
| H | 0.89330800  | -3.03391900 | -0.42292700 |

|   |             |             |             |
|---|-------------|-------------|-------------|
| H | 0.42544300  | -1.81739800 | 0.78118200  |
| H | 3.70659400  | 0.52168500  | -1.58415100 |
| H | 4.12210600  | 2.85591700  | -0.87560100 |
| H | 3.06908600  | 3.73029400  | 1.19816000  |
| H | 1.55703700  | 2.27750000  | 2.52479700  |
| H | 1.11776500  | -0.03486400 | 1.81448600  |
| N | -2.33490500 | -0.98561900 | -0.26888100 |
| N | -1.47736200 | 1.07770000  | -0.22504000 |
| N | 3.17775500  | -2.19416800 | 0.59642200  |
| H | 2.94645700  | -1.97659100 | 1.57237800  |
| H | 2.97179600  | -3.19125600 | 0.46319800  |
| C | 4.62366100  | -1.97119400 | 0.38101200  |
| C | 5.28519300  | -1.03962200 | 1.16761100  |
| C | 5.25111700  | -2.68728100 | -0.62890200 |
| C | 6.64174100  | -0.83030600 | 0.93453600  |
| H | 4.75994000  | -0.48421000 | 1.94039000  |
| C | 6.60718800  | -2.46457700 | -0.84870300 |
| H | 4.70512300  | -3.41176400 | -1.22822400 |
| C | 7.29851000  | -1.54014600 | -0.06813300 |
| H | 7.18428000  | -0.11440100 | 1.54148200  |
| H | 7.12200500  | -3.01882600 | -1.62518600 |
| H | 8.35636800  | -1.37531500 | -0.24014700 |

**IM2(VA)**

|   |             |             |             |
|---|-------------|-------------|-------------|
| C | -5.99055300 | -2.35520700 | -0.79225500 |
| N | -5.97274600 | -1.14952100 | -0.20474700 |
| C | -4.84050000 | -0.43201000 | -0.03703500 |
| C | -3.60285000 | -0.92356400 | -0.48005600 |
| C | -3.62578100 | -2.19525200 | -1.09869300 |
| C | -4.80272000 | -2.90164400 | -1.25217400 |
| C | -7.23462200 | -0.54698300 | 0.27886500  |
| C | -2.10488800 | 0.88969100  | 0.10852800  |
| S | -3.12119700 | 2.02341500  | 0.82017600  |
| C | -0.01628100 | 2.31225100  | 0.23475200  |
| C | -0.31254400 | 3.12636400  | 1.33493100  |
| N | 0.39836300  | 4.24339300  | 1.57296200  |
| C | 1.44231300  | 4.61458700  | 0.80889200  |
| C | 1.82306300  | 3.81181300  | -0.25065200 |
| C | 1.09876400  | 2.66654100  | -0.54267700 |
| C | -0.02108800 | 5.08928100  | 2.71347000  |
| O | -0.35614300 | -1.70734700 | -1.18669900 |
| C | 1.66991700  | -1.68105900 | 0.08002400  |
| C | 0.24714000  | -2.27381800 | -0.05031400 |
| C | 2.60079100  | -2.48044900 | 0.96246600  |
| C | 2.14110100  | -2.85569400 | 2.22934800  |
| C | 2.94337400  | -3.61509800 | 3.07262200  |
| C | 4.21428900  | -4.01306900 | 2.66210200  |
| C | 4.68242500  | -3.63727900 | 1.40898200  |
| C | 3.88182400  | -2.87050900 | 0.56403400  |
| H | -6.95051200 | -2.84716100 | -0.88188700 |
| H | -4.94686300 | 0.52807000  | 0.44565000  |
| H | -2.68930900 | -2.60687400 | -1.46318900 |
| H | -4.81721400 | -3.87383100 | -1.72924600 |
| H | -1.19675600 | -1.16127800 | -0.90655100 |
| H | -7.44225200 | 0.35184100  | -0.30196000 |
| H | -8.04222400 | -1.26485400 | 0.15378800  |
| H | -7.12315900 | -0.29685900 | 1.33355300  |
| H | -0.28438200 | 0.56515800  | -0.75530100 |
| H | -1.11706800 | 2.90532200  | 2.02021100  |
| H | 1.93998300  | 5.53965900  | 1.06954600  |
| H | 2.67185500  | 4.09921700  | -0.85867600 |
| H | 1.38306200  | 2.05472700  | -1.39613300 |
| H | 0.71135100  | 5.88060900  | 2.85613100  |
| H | -0.99849100 | 5.51818200  | 2.49063500  |
| H | -0.07454800 | 4.47138500  | 3.60930000  |
| H | 1.58323100  | -0.64116800 | 0.41767400  |
| H | 0.31613100  | -3.36416700 | -0.15026900 |



|   |             |             |             |
|---|-------------|-------------|-------------|
| H | -0.31510000 | -2.04574700 | 0.86247300  |
| H | 1.15343400  | -2.55358300 | 2.56586300  |
| H | 2.57358800  | -3.90134300 | 4.05118400  |
| H | 4.83678600  | -4.61083500 | 3.31857400  |
| H | 5.67284300  | -3.93524500 | 1.08314700  |
| H | 4.30054500  | -2.56972400 | -0.39504600 |
| N | -2.36891400 | -0.31779800 | -0.38982700 |
| N | -0.72423900 | 1.16742000  | -0.06694800 |
| N | 2.16619400  | -1.57392300 | -1.34738000 |
| H | 2.69977300  | -2.41997500 | -1.58236600 |
| H | 1.27575100  | -1.58677500 | -1.89189700 |
| C | 2.91060700  | -0.35525200 | -1.71502800 |
| C | 3.78786500  | 0.23117400  | -0.81060500 |
| C | 2.68617200  | 0.17504500  | -2.98108500 |
| C | 4.46577400  | 1.38458800  | -1.19938300 |
| H | 3.95220900  | -0.20385100 | 0.17061300  |
| C | 3.36980600  | 1.33023100  | -3.35415200 |
| H | 1.99801400  | -0.30493200 | -3.67224300 |
| C | 4.25958400  | 1.93164400  | -2.46490200 |
| H | 5.16817400  | 1.84445400  | -0.51259400 |
| H | 3.21443700  | 1.74994700  | -4.34193100 |
| H | 4.80652200  | 2.81884600  | -2.76673900 |

**TS2(VA)**Value of imaginary frequency = -527.1 cm<sup>-1</sup>

|   |             |             |             |
|---|-------------|-------------|-------------|
| C | 5.30420400  | -3.35609200 | 0.93706700  |
| N | 5.57504400  | -2.25114700 | 0.22543400  |
| C | 4.65094600  | -1.29886400 | -0.02572500 |
| C | 3.34597400  | -1.42557800 | 0.46383500  |
| C | 3.05300100  | -2.59496100 | 1.19876900  |
| C | 4.02422700  | -3.54917500 | 1.43314600  |
| C | 6.93602100  | -2.03520400 | -0.31512300 |
| C | 2.35431600  | 0.74396800  | -0.11992600 |
| S | 3.70464000  | 1.64205800  | -0.52271700 |
| C | 0.58199700  | 2.53705800  | -0.37306700 |
| C | 1.29004700  | 3.55218200  | -1.02515400 |
| N | 0.72213400  | 4.75786900  | -1.23343800 |
| C | -0.53176900 | 5.04907800  | -0.85467400 |
| C | -1.29059700 | 4.07490100  | -0.22618400 |
| C | -0.74076100 | 2.83067000  | 0.01616200  |
| C | 1.54275200  | 5.78048100  | -1.92330300 |
| O | 0.02390800  | -1.27247100 | 0.87069400  |
| C | -2.06561600 | -1.49526200 | -0.23208200 |
| C | -0.60739600 | -2.01987400 | -0.13064700 |
| C | -3.06543700 | -2.45515600 | -0.82961900 |
| C | -2.68753900 | -3.20590800 | -1.94767300 |
| C | -3.58054400 | -4.09778800 | -2.52992100 |
| C | -4.86003700 | -4.25620700 | -2.00096700 |
| C | -5.24465900 | -3.51226000 | -0.89152000 |
| C | -4.35372700 | -2.61176100 | -0.31125900 |
| H | 6.11564800  | -4.05558500 | 1.09127900  |
| H | 4.97665700  | -0.45197900 | -0.61111700 |
| H | 2.04653000  | -2.72028700 | 1.58808200  |
| H | 3.80696700  | -4.44276600 | 2.00502900  |
| H | 1.18945200  | -0.97264000 | 0.60263500  |
| H | 7.34262200  | -1.11875500 | 0.11239400  |
| H | 7.56398400  | -2.88125400 | -0.04529600 |
| H | 6.87437400  | -1.95149000 | -1.40005500 |
| H | 0.36384400  | 0.62425800  | 0.26589200  |
| H | 2.30357800  | 3.42161500  | -1.37442600 |
| H | -0.89241100 | 6.04810600  | -1.06308000 |
| H | -2.30475700 | 4.29958200  | 0.08068700  |
| H | -1.33319200 | 2.07451700  | 0.52685000  |
| H | 0.99633500  | 6.72070000  | -1.94153900 |
| H | 2.47774100  | 5.90560700  | -1.37783900 |
| H | 1.74004500  | 5.44448600  | -2.94146500 |
| H | -2.04596200 | -0.54379100 | -0.77613600 |

|   |             |             |             |
|---|-------------|-------------|-------------|
| H | -0.62699500 | -3.09328800 | 0.10876600  |
| H | -0.12403100 | -1.90082200 | -1.11001000 |
| H | -1.69362100 | -3.09568900 | -2.37197200 |
| H | -3.27587700 | -4.67442600 | -3.39648300 |
| H | -5.55357900 | -4.95668500 | -2.45285600 |
| H | -6.23900700 | -3.62690900 | -0.47416300 |
| H | -4.69571900 | -2.02835700 | 0.54185800  |
| N | 2.30126500  | -0.54548500 | 0.27738700  |
| N | 1.05937700  | 1.27088000  | -0.11037600 |
| N | -2.39687500 | -1.11462100 | 1.19204300  |
| H | -2.91606100 | -1.87886200 | 1.63864000  |
| H | -1.39758900 | -1.07469600 | 1.58126200  |
| C | -3.04831800 | 0.18230900  | 1.41962100  |
| C | -3.95173500 | 0.69445700  | 0.49450900  |
| C | -2.70324000 | 0.87950900  | 2.57337700  |
| C | -4.52206900 | 1.94208700  | 0.73954200  |
| H | -4.21843200 | 0.13129200  | -0.39500700 |
| C | -3.28220600 | 2.12438000  | 2.80679000  |
| H | -1.99560700 | 0.45791500  | 3.28218000  |
| C | -4.19029400 | 2.65441700  | 1.89092000  |
| H | -5.23981000 | 2.34648300  | 0.03409200  |
| H | -3.02929000 | 2.67293800  | 3.70733500  |
| H | -4.65318100 | 3.61671000  | 2.08367700  |

**IM3(VA)**

|   |             |             |             |
|---|-------------|-------------|-------------|
| C | -6.47980700 | -2.55736400 | -0.66007400 |
| N | -6.46533900 | -1.38211700 | -0.01282500 |
| C | -5.33587800 | -0.66760600 | 0.17691400  |
| C | -4.11873400 | -1.13582300 | -0.31682000 |
| C | -4.11920400 | -2.37353700 | -0.98503400 |
| C | -5.29484800 | -3.08031600 | -1.15385600 |
| C | -7.72884700 | -0.81227200 | 0.51352800  |
| C | -2.59277400 | 0.81062300  | 0.14411800  |
| S | -3.69808900 | 2.01473000  | 0.41375600  |
| C | -0.45826200 | 2.12766500  | 0.23803100  |
| C | -0.84216800 | 3.31385800  | 0.85764700  |
| N | 0.00804500  | 4.36187900  | 0.88500100  |
| C | 1.24047800  | 4.30926000  | 0.34887100  |
| C | 1.68143200  | 3.14534600  | -0.25862900 |
| C | 0.82665500  | 2.05863500  | -0.32137700 |
| C | -0.46617300 | 5.62119300  | 1.50499700  |
| O | -0.23502700 | -1.47918000 | -0.94228900 |
| C | 2.02813000  | -1.57577800 | -0.02705500 |
| C | 0.75950100  | -2.35412700 | -0.38508900 |
| C | 3.06759800  | -2.52018800 | 0.55383000  |
| C | 2.89328400  | -2.99858600 | 1.85518200  |
| C | 3.79617800  | -3.90473500 | 2.40119500  |
| C | 4.88602500  | -4.33796800 | 1.64922900  |
| C | 5.06998900  | -3.85842900 | 0.35621400  |
| C | 4.16397800  | -2.95286400 | -0.19067800 |
| H | -7.43824300 | -3.04924900 | -0.76845300 |
| H | -5.43586900 | 0.26449600  | 0.71295100  |
| H | -3.18500500 | -2.76869300 | -1.37533600 |
| H | -5.30815100 | -4.03122400 | -1.67220600 |
| H | -2.09976500 | -1.07052600 | -0.46635500 |
| H | -7.96584200 | 0.09261900  | -0.04645100 |
| H | -8.52379500 | -1.54472600 | 0.39308200  |
| H | -7.59634400 | -0.58321600 | 1.57051200  |
| H | -0.68455900 | 0.13635000  | -0.07276900 |
| H | -1.80593300 | 3.45155500  | 1.32500400  |
| H | 1.84146600  | 5.20743600  | 0.42020600  |
| H | 2.67975200  | 3.09120800  | -0.68354500 |
| H | 1.14874300  | 1.14353700  | -0.81566800 |
| H | -1.10612100 | 6.14533000  | 0.79411400  |
| H | -1.02279100 | 5.38033200  | 2.40930200  |
| H | 0.39473000  | 6.23539500  | 1.76013800  |
| H | 1.74899500  | -0.83661900 | 0.73969000  |
| H | 0.99222700  | -3.15053400 | -1.10278100 |

|   |             |             |             |
|---|-------------|-------------|-------------|
| H | 0.32773000  | -2.81145300 | 0.50639900  |
| H | 2.05008500  | -2.65335300 | 2.45112800  |
| H | 3.65418600  | -4.26796000 | 3.41340600  |
| H | 5.59429400  | -5.04114600 | 2.07362300  |
| H | 5.92428300  | -4.18253600 | -0.22827000 |
| H | 4.33854200  | -2.57230200 | -1.19317300 |
| N | -2.89366700 | -0.49920500 | -0.17061400 |
| N | -1.23067600 | 0.97002400  | 0.16383200  |
| N | 2.41524100  | -0.81504400 | -1.21073000 |
| H | 2.65051100  | -1.43026100 | -1.98736300 |
| H | 0.20352500  | -1.04484900 | -1.69257000 |
| C | 3.40338900  | 0.20515100  | -1.07645900 |
| C | 3.97004300  | 0.55576000  | 0.15210600  |
| C | 3.75737700  | 0.92356000  | -2.22612800 |
| C | 4.88342500  | 1.60869400  | 0.21848900  |
| H | 3.74650400  | -0.01047600 | 1.04946200  |
| C | 4.68135400  | 1.95913300  | -2.15209300 |
| H | 3.31023700  | 0.65634500  | -3.18017600 |
| C | 5.24623500  | 2.31296000  | -0.92521500 |
| H | 5.33292400  | 1.85661700  | 1.17462800  |
| H | 4.96212700  | 2.49008500  | -3.05577100 |
| H | 5.97570800  | 3.11335500  | -0.86825200 |

**IM1(VIIB)**

|   |             |             |             |
|---|-------------|-------------|-------------|
| C | 3.52579000  | -4.91493200 | -0.47493100 |
| N | 4.12917600  | -3.93049000 | 0.22010200  |
| C | 3.74934900  | -2.64486800 | 0.11987600  |
| C | 2.69835600  | -2.25901200 | -0.72522100 |
| C | 2.07469800  | -3.28373000 | -1.46201000 |
| C | 2.48749200  | -4.60082400 | -1.33340400 |
| C | 5.26863100  | -4.24778500 | 1.10755200  |
| C | 2.35619800  | -0.02669600 | 0.01000100  |
| S | 2.42709900  | -0.23317300 | 1.68999500  |
| C | 2.01446300  | 2.48783800  | -0.04902700 |
| C | 1.41761500  | 3.44639900  | -0.87053300 |
| N | 1.24400400  | 4.71528400  | -0.46373600 |
| C | 1.60899800  | 5.11912600  | 0.76562500  |
| C | 2.21269300  | 4.21602700  | 1.62361000  |
| C | 2.43692500  | 2.90604800  | 1.22892600  |
| C | 0.63674200  | 5.67228600  | -1.41065000 |
| O | -0.24942100 | -0.83300000 | -1.83911800 |
| C | -0.79668500 | -0.58720800 | -0.57496200 |
| C | -2.12738900 | -1.35374500 | -0.59610300 |
| C | -1.06622600 | 0.88747000  | -0.31504100 |
| C | -0.91093000 | 1.43718600  | 0.96201100  |
| C | -1.28043100 | 2.76203100  | 1.20810500  |
| C | -1.81116700 | 3.53930400  | 0.18151000  |
| C | -1.95046600 | 2.99893500  | -1.10013000 |
| C | -1.57623000 | 1.68046900  | -1.34911800 |
| H | 3.89987200  | -5.91945600 | -0.32740500 |
| H | 4.30304300  | -1.92919100 | 0.71299200  |
| H | 1.26134200  | -3.01790500 | -2.13064300 |
| H | 2.01239400  | -5.39502300 | -1.89626300 |
| H | 0.73495800  | -0.82090400 | -1.73595700 |
| H | 5.09935100  | -3.78227500 | 2.07790300  |
| H | 5.33810600  | -5.32705700 | 1.22510500  |
| H | 6.18542000  | -3.86420400 | 0.65882000  |
| H | 2.07699400  | 1.15550500  | -1.59097100 |
| H | 1.05799400  | 3.21040300  | -1.86615300 |
| H | 1.42880500  | 6.15676300  | 1.01562500  |
| H | 2.53094600  | 4.55491100  | 2.60211100  |
| H | 2.93076300  | 2.20341300  | 1.88565000  |
| H | 0.39711200  | 6.59190000  | -0.88083900 |
| H | 1.34651700  | 5.88040400  | -2.21197000 |
| H | -0.27507600 | 5.23046100  | -1.81344200 |
| H | -0.15460000 | -0.98006200 | 0.23159500  |
| H | -1.97596400 | -2.43121200 | -0.67640200 |

|   |             |             |             |
|---|-------------|-------------|-------------|
| H | -2.73413100 | -1.01343000 | -1.43830800 |
| H | -0.46265300 | 0.84023000  | 1.75553900  |
| H | -1.15943900 | 3.17925400  | 2.20294800  |
| H | -2.12640100 | 4.55978000  | 0.37938200  |
| H | -2.37649200 | 3.59801100  | -1.90029500 |
| H | -1.67575500 | 1.25133800  | -2.34283800 |
| N | 2.32744000  | -0.95653700 | -0.94090100 |
| N | 2.17192000  | 1.22910000  | -0.58353300 |
| N | -2.93920800 | -1.09762300 | 0.64912900  |
| H | -2.48616500 | -1.54442800 | 1.45364500  |
| H | -2.91017000 | -0.08479100 | 0.84019600  |
| C | -4.34437700 | -1.54680100 | 0.55609200  |
| C | -4.67146900 | -2.82827100 | 0.97160300  |
| C | -5.27236800 | -0.66709800 | 0.01711300  |
| C | -5.99597300 | -3.23944200 | 0.84646500  |
| H | -3.92199500 | -3.49510800 | 1.38976500  |
| C | -6.59131100 | -1.09390800 | -0.09996000 |
| H | -4.97676600 | 0.32951300  | -0.30232500 |
| C | -6.94995300 | -2.37562000 | 0.31357300  |
| H | -6.28033800 | -4.23425100 | 1.16989200  |
| H | -7.33717200 | -0.42282200 | -0.51038600 |
| H | -7.97988600 | -2.70223100 | 0.22280600  |

**IM2(VIIB)**

|   |             |             |             |
|---|-------------|-------------|-------------|
| C | -0.84511600 | 5.87882700  | -0.29213400 |
| N | -1.96789400 | 5.26408600  | 0.13020200  |
| C | -2.16621000 | 3.94528900  | -0.03044900 |
| C | -1.20510400 | 3.12863500  | -0.64652600 |
| C | -0.04223600 | 3.77260300  | -1.10674600 |
| C | 0.13293700  | 5.13667500  | -0.92785600 |
| C | -3.03511300 | 6.04629800  | 0.79090000  |
| C | -2.05482100 | 1.00205100  | -0.04665600 |
| S | -2.38532000 | 1.27366800  | 1.58841600  |
| C | -2.91405200 | -1.38532700 | -0.25505700 |
| C | -2.90164900 | -2.44638600 | -1.16521100 |
| N | -3.43028800 | -3.64460800 | -0.86675100 |
| C | -3.98695900 | -3.89374400 | 0.33180100  |
| C | -4.04059200 | -2.88059500 | 1.27211700  |
| C | -3.51860100 | -1.62637300 | 0.99643100  |
| C | -3.33449100 | -4.71691700 | -1.87713300 |
| O | 1.06329000  | 0.61212300  | -1.12891200 |
| C | 1.03368000  | 0.10247600  | 0.18536200  |
| C | 2.48594200  | 0.14925200  | 0.66342700  |
| C | 0.49311800  | -1.31871900 | 0.24980300  |
| C | -0.01646400 | -1.81779900 | 1.45166900  |
| C | -0.42672900 | -3.14588000 | 1.54201000  |
| C | -0.32298600 | -3.99061200 | 0.43680800  |
| C | 0.16410400  | -3.49229100 | -0.77065600 |
| C | 0.55984600  | -2.15664200 | -0.86781800 |
| H | -0.77021300 | 6.94308100  | -0.11266700 |
| H | -3.10661000 | 3.55330300  | 0.33272000  |
| H | 0.72064200  | 3.17844300  | -1.59934600 |
| H | 1.02764800  | 5.63763000  | -1.27678000 |
| H | 0.16420600  | 0.99302800  | -1.30892100 |
| H | -3.24019200 | 5.60536700  | 1.76628400  |
| H | -2.69875800 | 7.07337900  | 0.91392900  |
| H | -3.92964300 | 6.02286500  | 0.16835700  |
| H | -2.08413200 | -0.17640800 | -1.66643200 |
| H | -2.46338600 | -2.35343700 | -2.15276900 |
| H | -4.38786800 | -4.88637900 | 0.49130500  |
| H | -4.51141000 | -3.07595800 | 2.22812900  |
| H | -3.57480400 | -0.82839000 | 1.72411800  |
| H | -3.95018400 | -5.55737500 | -1.56428000 |
| H | -3.69334300 | -4.33950300 | -2.83412700 |
| H | -2.29123000 | -5.02752200 | -1.95707400 |
| H | 0.44650300  | 0.74359800  | 0.85844000  |
| H | 2.64608000  | -0.35950700 | 1.61537100  |



|   |             |             |             |
|---|-------------|-------------|-------------|
| H | 2.85335400  | 1.17550200  | 0.71925200  |
| H | -0.10130500 | -1.16109300 | 2.31470300  |
| H | -0.81570300 | -3.52550400 | 2.48152200  |
| H | -0.60916300 | -5.03486800 | 0.52190900  |
| H | 0.25680500  | -4.14466500 | -1.63485300 |
| H | 0.90761500  | -1.75304900 | -1.81596600 |
| N | -1.39315100 | 1.79156300  | -0.89749800 |
| N | -2.35771200 | -0.20434200 | -0.69006300 |
| N | 3.32832400  | -0.54137000 | -0.37697400 |
| H | 3.00388900  | -1.51435900 | -0.45837800 |
| H | 3.08994500  | -0.09048000 | -1.27222600 |
| C | 4.77906300  | -0.50569900 | -0.12069000 |
| C | 5.32984200  | -1.48962900 | 0.68791600  |
| C | 5.52892800  | 0.52591800  | -0.66585500 |
| C | 6.69518000  | -1.43772600 | 0.95179000  |
| H | 4.71446600  | -2.28484900 | 1.10093800  |
| C | 6.89338100  | 0.56354900  | -0.39186900 |
| H | 5.06804800  | 1.28113000  | -1.29712300 |
| C | 7.47242700  | -0.41426000 | 0.41383900  |
| H | 7.14985600  | -2.19939900 | 1.57503500  |
| H | 7.50257900  | 1.35525800  | -0.81307400 |
| H | 8.53622200  | -0.38065400 | 0.62091400  |

**TS2(VIIB)**Value of imaginary frequency = -194.9 cm<sup>-1</sup>

|   |             |             |             |
|---|-------------|-------------|-------------|
| C | -3.71522200 | 4.38604200  | 0.00027500  |
| N | -2.48932300 | 4.92108000  | 0.10855400  |
| C | -1.36867700 | 4.17123800  | 0.17406300  |
| C | -1.44853000 | 2.77729500  | 0.12576600  |
| C | -2.73293400 | 2.20615300  | 0.02812500  |
| C | -3.85668500 | 3.00727200  | -0.03565700 |
| C | -2.32464700 | 6.39228300  | 0.15842300  |
| C | 0.94813600  | 2.14277500  | 0.05472200  |
| S | 1.68038200  | 3.57504800  | -0.36219300 |
| C | 2.99299600  | 0.72308100  | 0.07216900  |
| C | 3.65129200  | -0.13891200 | 0.94356100  |
| N | 4.93157400  | -0.49415000 | 0.73702700  |
| C | 5.63424100  | -0.01973200 | -0.30767100 |
| C | 5.03337300  | 0.84643100  | -1.20257100 |
| C | 3.70710000  | 1.21731300  | -1.02976500 |
| C | 5.59343700  | -1.37638500 | 1.72154800  |
| O | -0.76140300 | -0.62915700 | 0.40819400  |
| C | -0.25778900 | -1.25735000 | -0.73136800 |
| C | -1.37856900 | -2.24117400 | -1.19311000 |
| C | 1.03597100  | -2.01206700 | -0.44301700 |
| C | 1.98795700  | -2.21624000 | -1.44601300 |
| C | 3.14501100  | -2.94636000 | -1.18619600 |
| C | 3.35801200  | -3.49155900 | 0.08080800  |
| C | 2.42097200  | -3.28110200 | 1.09105700  |
| C | 1.27156900  | -2.53216800 | 0.83284000  |
| H | -4.55016400 | 5.07278100  | -0.05402500 |
| H | -0.43189900 | 4.70222600  | 0.26069300  |
| H | -2.81524800 | 1.12293100  | -0.00038800 |
| H | -4.84795200 | 2.57956500  | -0.12028500 |
| H | -0.65417200 | 0.84788400  | 0.31161200  |
| H | -1.71649700 | 6.70592300  | -0.68987600 |
| H | -3.30458700 | 6.86137500  | 0.10604800  |
| H | -1.83567000 | 6.65919000  | 1.09523000  |
| H | 1.11071000  | 0.22010900  | 0.74081500  |
| H | 3.16470500  | -0.55990000 | 1.81511700  |
| H | 6.66281800  | -0.34807800 | -0.39301400 |
| H | 5.60563800  | 1.21262300  | -2.04625600 |
| H | 3.22345000  | 1.87441700  | -1.74053300 |
| H | 6.38927300  | -1.92592700 | 1.22181700  |
| H | 6.00598100  | -0.76531300 | 2.52557600  |
| H | 4.85651900  | -2.07690700 | 2.11127300  |
| H | -0.07772300 | -0.55019700 | -1.55760500 |

|   |             |             |             |
|---|-------------|-------------|-------------|
| H | -1.02276600 | -3.08886000 | -1.77947000 |
| H | -2.15875900 | -1.70838800 | -1.73949800 |
| H | 1.81960900  | -1.80532400 | -2.43922100 |
| H | 3.87067900  | -3.10859400 | -1.97697000 |
| H | 4.24139200  | -4.09328000 | 0.27327800  |
| H | 2.57382300  | -3.71379500 | 2.07597800  |
| H | 0.55433000  | -2.33664900 | 1.62639900  |
| N | -0.38653600 | 1.90125400  | 0.19992800  |
| N | 1.64913100  | 0.97696100  | 0.31511600  |
| N | -1.98684700 | -2.67693900 | 0.10032000  |
| H | -1.47936500 | -3.48103600 | 0.47730800  |
| H | -1.66043400 | -1.74174200 | 0.65413800  |
| C | -3.42762500 | -2.92304700 | 0.10914300  |
| C | -3.95170300 | -3.97120800 | -0.63802300 |
| C | -4.23506700 | -2.09080000 | 0.87293000  |
| C | -5.32570800 | -4.18809800 | -0.61442900 |
| H | -3.30084700 | -4.61218200 | -1.22599600 |
| C | -5.60916700 | -2.31793500 | 0.88885500  |
| H | -3.79305400 | -1.29328800 | 1.46430400  |
| C | -6.15214700 | -3.36287500 | 0.14644500  |
| H | -5.75021600 | -5.00495800 | -1.18744600 |
| H | -6.25238600 | -1.68601600 | 1.49127200  |
| H | -7.22164800 | -3.54079300 | 0.16517500  |

**IM3(VIIB)**

|   |             |             |             |
|---|-------------|-------------|-------------|
| C | 5.06534800  | 2.22935600  | -0.31375900 |
| N | 4.10826100  | 3.16545100  | -0.44934400 |
| C | 2.80016700  | 2.85003700  | -0.51136100 |
| C | 2.38961300  | 1.52288500  | -0.40926200 |
| C | 3.37474300  | 0.53233900  | -0.28771600 |
| C | 4.71278300  | 0.89370700  | -0.24536900 |
| C | 4.47446900  | 4.59830400  | -0.53785500 |
| C | -0.05316500 | 1.82160900  | -0.03920600 |
| S | -0.03638400 | 3.28218300  | 0.74429400  |
| C | -2.49970100 | 1.41327300  | 0.05717400  |
| C | -3.52732500 | 1.11630700  | -0.82862400 |
| N | -4.81492800 | 1.31953000  | -0.49245400 |
| C | -5.15734700 | 1.82791900  | 0.70360900  |
| C | -4.17449800 | 2.14179500  | 1.62571600  |
| C | -2.83949000 | 1.92359100  | 1.31913800  |
| C | -5.85570000 | 0.99147900  | -1.48990100 |
| O | -0.05646200 | -1.36117400 | -1.27381400 |
| C | -0.48472100 | -2.03308100 | -0.08563400 |
| C | 0.02644100  | -3.49233700 | -0.15484100 |
| C | -1.98935700 | -1.96494700 | 0.03217500  |
| C | -2.59366400 | -1.68260700 | 1.25731700  |
| C | -3.98304100 | -1.65993300 | 1.37041300  |
| C | -4.77638800 | -1.92120300 | 0.25511000  |
| C | -4.17715100 | -2.19826300 | -0.97505200 |
| C | -2.78865300 | -2.21151600 | -1.08809900 |
| H | 6.08888300  | 2.57905600  | -0.26442200 |
| H | 2.10896800  | 3.67093100  | -0.63855100 |
| H | 3.09376800  | -0.51681200 | -0.21196800 |
| H | 5.48049700  | 0.13755500  | -0.13861700 |
| H | 0.88438500  | 0.17014600  | -0.78812400 |
| H | 4.00562300  | 5.13142500  | 0.28918600  |
| H | 5.55616300  | 4.69219100  | -0.47409100 |
| H | 4.12509300  | 4.99278900  | -1.49199000 |
| H | -1.09535000 | 0.32494300  | -0.98008600 |
| H | -3.34445600 | 0.70907900  | -1.81668100 |
| H | -6.21465300 | 1.96967100  | 0.89049600  |
| H | -4.46518200 | 2.53801700  | 2.59104400  |
| H | -2.06661300 | 2.13271700  | 2.04654100  |
| H | -6.83209700 | 1.04142600  | -1.01238500 |
| H | -5.80476900 | 1.71147400  | -2.30738600 |
| H | -5.67367600 | -0.01966300 | -1.85415900 |
| H | -0.03713800 | -1.52208800 | 0.77875800  |
| H | -0.64949800 | -4.06672300 | -0.79367100 |

|   |             |             |             |
|---|-------------|-------------|-------------|
| H | 0.00144300  | -3.94430000 | 0.84464600  |
| H | -1.97595100 | -1.48505900 | 2.13058400  |
| H | -4.44400600 | -1.46011400 | 2.33262400  |
| H | -5.85834200 | -1.93746300 | 0.34964300  |
| H | -4.78993300 | -2.43764600 | -1.83972700 |
| H | -2.31749400 | -2.42702600 | -2.04354900 |
| N | 1.05291800  | 1.13542000  | -0.47839800 |
| N | -1.19707400 | 1.11322800  | -0.34057300 |
| N | 1.33573400  | -3.50741000 | -0.78665100 |
| H | 1.49983000  | -4.33255600 | -1.35079200 |
| H | 0.61845400  | -1.96013100 | -1.66490200 |
| C | 2.48610200  | -3.11103100 | -0.06198600 |
| C | 3.72067900  | -3.12842900 | -0.72745800 |
| C | 2.43433300  | -2.66894500 | 1.26405500  |
| C | 4.87982900  | -2.73832100 | -0.06941700 |
| H | 3.76491100  | -3.47111600 | -1.75767300 |
| C | 3.60211500  | -2.25943900 | 1.90996000  |
| H | 1.50381100  | -2.68050000 | 1.81983000  |
| C | 4.82726900  | -2.29369000 | 1.25403400  |
| H | 5.83093800  | -2.79590600 | -0.58991300 |
| H | 3.54879000  | -1.93923600 | 2.94538800  |
| H | 5.73494000  | -2.00731500 | 1.77472900  |
